# Supplementary material for: Male pheromones modulate synaptic transmission at the C. elegans neuromuscular junction in a sexually dimorphic manner
Source: eLife. 2021 Mar 31;10:e67170. doi: 10.7554/eLife.67170 (PMC8051947; doi:10.7554/eLife.67170)
Supplement: Figure 1—figure supplement 1—source data 1. [file elife-67170-fig1-figsupp1-data1.xlsx]

## Sheet: Figure 1-figure supplement 1
Figure 1-figure supplement 1
Ratio change (ΔF/F)
Normalized to herm-cond
herm-cond	male-cond
72.7761	217.436
72.7761	315.899
43.929	111.261
122.946	186.531
111.322	168.729
29.4128	256.973
22.2248	68.6137
76.9205	101.84
198.379	66.3708
40.7115	39.4328
55.1342	227.903
326.135	128.106
155.665	452.14
27.164	242.157
45.2749	137.551
98.1532	222.801
274.301	109.669
85.8148	84.4651
40.9601	0
