# Supplementary material for: Male pheromones modulate synaptic transmission at the C. elegans neuromuscular junction in a sexually dimorphic manner
Source: eLife. 2021 Mar 31;10:e67170. doi: 10.7554/eLife.67170 (PMC8051947; doi:10.7554/eLife.67170)
Supplement: Figure 1—source data 1. [file elife-67170-fig1-data1.xlsx]

## Sheet: Fig 1
Fig. 1 B
	Self-ferlitization			Crossed
time/min	Blind No. 1	4	6	2	3	5
0	0	0	0	0	0	0
10	0	0	0	0	0	0
20	0	0	0	0	0	0
30	0	0	0	0	0	0
40	0	0	0	13.04	14.29	14.29
50	11.76	20	14.29	34.78	52.38	39.29
60	17.65	35	19.05	65.22	85.71	85.71
70	41.18	45	33.33	95.65	100	96.43
80	70.59	75	61.9	100	100	100
90	88.24	95	76.19	100	100	100
100	94.12	100	90.48	100	100	100
110	100	100	100	100	100	100
120	100	100	100	100	100	100
Fig. 1 D
	Herm-cond			Male-cond
time/min	Blind No. 2	8	11	1	6	9
0	0	0	0	0	0	0
10	0	0	0	0	0	0
20	0	0	0	0	0	0
30	3.57143	3.57143	0	3.84615	3.57143	3.57143
40	3.57143	3.57143	4.16667	7.69231	17.8571	17.8571
50	10.7143	21.4286	4.16667	26.9231	53.5714	42.8571
60	42.8571	32.1429	50	53.8462	67.8571	64.2857
70	67.8571	57.1429	58.3333	73.0769	85.7143	82.1429
80	78.5714	75	83.3333	92.3077	92.8571	96.4286
90	85.7143	89.2857	95.8333	96.1538	100	100
100	96.4286	100	100	100	100	100
Fig. 1 F			Ratio change (ΔF/F)
time/sec	Herm-cond																			Male-cond
8.1312	0.170506	0.170506	0.098805	0.044569	0.606115	-0.11715	0.072112	0.196412	0.95076	0.048589	0.227262	1.17211	0.384581	0.055325	0.232304	0.557691	1.84857	0.094375	0.263994	0.753964	0.54429	0.51	0.793979	0.249437	0.798025	0.054734	0.298547	0.270904	0.225168	0.325625	0.592002	0.582905	0.223641	0.382199	-0.27031	-0.00042	-0.14915
8.4023	-0.0282	-0.0282	0.113255	0.118749	0.812625	0.009066	-0.07373	0.127652	1.19176	0.073829	0.251452	0.91371	0.299592	0.034824	-0.05069	0.280981	1.46507	0.099374	0.201494	0.372214	0.17619	0.35531	0.76306	0.843836	0.150425	0.051473	0.349397	0.182103	-0.10418	0.491825	0.379162	-0.15669	-0.00713	0.333889	-0.26747	0.110685	-0.15386
8.6733	0.253847	0.253847	0.078775	0.379739	0.478015	0.066081	0.081361	-0.15985	0.45076	0.07006	0.286932	0.95541	0.256812	0.049554	0.069815	0.313031	1.24797	-0.06376	0.144755	0.404314	0.75609	0.42406	0.691629	0.606447	0.220925	0.159314	0.342136	0.050954	0.006747	0.248325	0.411262	0.317805	-0.05012	0.339679	-0.18224	0.717525	0.017133
8.9444	0.273076	0.273076	0.045455	0.203909	0.545415	0.062671	0.105671	-0.08172	0.77216	0.00281	0.048222	-0.08069	0.219582	-0.00905	-0.10685	0.518161	1.20117	0.088125	0.110225	0.546204	0.84639	0.16156	0.01893	0.258786	0.323325	0.077614	0.451087	0.048224	0.051107	0.557225	0.242902	-0.2234	0.35487	0.370628	0.005257	0.042305	0.020663
9.2154	0.478207	0.478207	0.069225	0.38386	0.335565	0.097758	0.189002	-0.13797	1.13526	0.090589	0.099842	0.12761	-0.11486	0.020115	0.023475	0.239321	0.54337	0.018124	0.063064	-0.07205	0.10159	0.51781	-0.04398	0.195236	0.036125	0.010624	-0.2075	-0.14714	0.136437	0.169825	0.148872	-0.225	-0.04333	0.354979	0.232527	-0.15428	-0.05717
9.4865	-0.14359	-0.14359	0.038235	0.05969	0.403915	0.071444	0.179742	-0.53485	0.34656	0.046929	0.324032	0.28321	0.065692	0.113345	0.095995	0.018161	0.39657	-0.04313	0.031094	-0.36428	0.54429	0.235	-0.04291	0.049436	0.193025	-0.1871	-0.00895	-0.07336	0.010158	-0.03957	0.218132	0.059105	0.23495	0.224708	-0.07145	0.110685	-0.13795
9.7575	0.228207	0.228207	-0.03119	0.315179	0.384325	-0.08353	0.082521	-0.3161	0.37926	0.08327	0.235322	0.34981	0.045692	0.003364	0.011475	0.180551	0.22687	-0.01313	-0.06369	-0.02138	-0.32731	0.10375	-0.02692	0.041967	-0.19927	0.319444	-0.27046	-0.17036	0.098887	0.172425	0.210252	0.586105	-0.07726	-0.03821	-0.06576	-0.05171	-0.25351
10.0285	-0.11795	-0.11795	0.116515	-0.06119	0.342255	0.025637	0.099892	-0.16922	0.11446	0.014599	0.207902	-0.23899	0.046812	0.066005	-0.15701	0.009621	0.01237	0.017505	-0.01239	0.015794	-0.32381	0.08656	0.091419	0.264387	-0.32298	0.203433	0.407507	-0.04877	0.122787	-0.12858	0.340312	0.373405	0.12409	0.070628	-0.01747	-0.03461	-0.08075
10.2996	-0.07307	-0.07307	0.023785	0.24925	0.122845	-0.02553	0.061692	0.043282	-0.20704	-0.13994	0.115972	0.18321	0.227912	0.067455	-0.00325	0.034191	0.00387	-0.10313	0.014314	-0.49941	-0.57031	-0.44156	-0.2572	-0.03841	-0.18198	0.072714	0.184747	0.063254	0.034047	-0.05788	-0.01554	0.762305	-0.11573	0.033898	-0.22485	-0.22265	-0.25174
10.5706	0.106406	0.106406	-0.00952	0.17644	0.062145	0.051951	-0.21493	-0.20672	0.17696	0.00469	-0.2292	-0.57789	0.304582	0.059944	0.019114	0.224361	-0.10993	-0.07438	-0.00407	0.088434	-0.57201	-0.14469	-0.07702	-0.34121	-0.20857	-0.09886	0.247697	0.052324	-0.10589	-0.01607	-0.16082	0.670205	0.110531	-0.03107	-0.17372	-0.41924	-0.08429
10.8417	0.106406	0.106406	-0.00836	-0.03372	-0.27821	0.049998	-0.01354	0.030782	-0.49864	0.04127	-0.10661	-0.80849	-0.1632	-0.0538	-0.04632	0.100431	-0.38033	-0.03063	-0.02293	-0.1734	-0.58771	-0.28218	-0.26146	-0.4627	-0.06628	0.040034	0.005567	0.052324	-0.12978	-0.11027	-0.15462	0.273405	-0.2198	-0.18413	-0.4777	-0.30812	0.053683
11.1127	-0.16281	-0.16281	-0.06218	-0.21092	-0.28536	0.128947	-0.01933	0.177662	-0.29924	-0.0281	-0.14371	-0.22509	0.003472	-0.02262	-0.09485	-0.10257	-0.29153	-0.03	-0.04771	-0.44198	-0.09631	-0.24625	-0.31797	-0.14682	0.361925	-0.09559	-0.0937	-0.02145	0.022097	-0.04347	-0.31678	-0.0139	-0.0388	-0.07937	0.008097	0.290175	0.134463
11.3837	0.144877	0.144877	-0.05987	-0.04059	-0.3284	0.016375	-0.07373	0.177662	-0.56114	-0.13193	-0.20017	-0.15569	0.039031	0.045505	-0.0545	-0.06731	-0.22903	-0.18625	0.030775	-0.26124	-0.07031	-0.14625	-0.125	-0.41785	0.451025	0.020424	0.017676	-0.04331	-0.10418	-0.03048	-0.43897	-0.3123	0.044911	-0.14535	-0.3527	-0.05171	-0.10787
11.6548	0.010257	0.010257	-0.0475	-0.17658	-0.2849	-0.1191	0.000352	0.155782	-0.36474	-0.10998	-0.23887	-0.57239	-0.15098	-0.02984	0.023475	-0.01496	-0.36263	-0.14438	-0.04564	0.090114	-0.46611	0.00219	-0.32969	-0.26644	0.086625	-0.14298	-0.15666	-0.1608	-0.01203	-0.11677	-0.2937	-0.0044	-0.07047	-0.28617	0.297867	-0.06881	-0.04537
11.9258	-0.18846	-0.18846	0.041035	-0.33867	-0.37476	0.014422	0.028122	0.021402	-0.34094	-0.06397	-0.19532	-0.04459	-0.19264	-0.1075	0.012024	-0.23184	-0.65013	-0.02938	-0.1158	-0.24434	-0.29951	-0.00719	-0.33715	-0.15616	0.057425	0.080884	-0.17845	-0.11844	0.008447	-0.56317	-0.34268	-0.5679	-0.23563	-0.34706	-0.02315	-0.51326	0.162173
12.1969	0.151287	0.151287	-0.14769	-0.26312	-0.64484	-0.0348	-0.16054	0.237032	-0.57304	-0.08945	-0.12274	0.11101	-0.05764	-0.05813	0.015834	-0.1485	-0.92843	0.153125	-0.15769	0.147554	0.45919	-0.2275	-0.11221	-0.05336	0.034825	-0.14134	-0.18813	0.074174	-0.1093	-0.45447	-0.34887	-0.0456	-0.36459	-0.12631	0.363217	0.401285	0.258873
12.4679	-0.32949	-0.32949	-0.06755	-0.12987	-0.55259	-0.0348	-0.05289	0.087032	-0.52244	0.021679	-0.20017	-0.01679	-0.1782	-0.10576	0.025655	-0.36752	-1.06653	0.121875	-0.16024	-0.19705	0.21619	-0.20406	0.106339	-0.21037	-0.17537	-0.08415	-0.27772	0.119264	0.011858	-0.11948	-0.12477	-0.2504	-0.51844	-0.22733	0.775147	-0.15428	0.217013
12.7389	-0.25897	-0.25897	-0.05542	-0.2068	-0.37095	-0.02456	-0.10614	0.052662	-0.86174	-0.0852	-0.11468	-0.45569	-0.38097	-0.03215	0.011475	-0.29701	-0.89353	-0.10313	-0.06657	0.161064	-0.01481	-0.0275	0.009329	-0.01411	-0.33228	-0.07762	-0.28983	0.132924	0.022097	-0.22807	-0.03018	-0.6758	-0.29446	-0.18311	0.414347	-0.06026	0.099673
13.01	-0.27179	-0.27179	-0.16517	-0.14499	-0.53441	-0.07768	-0.06215	0.215152	-0.64744	0.13825	-0.25984	-0.55019	-0.28875	-0.05755	-0.03814	-0.60791	-0.96393	0.183125	-0.05043	-0.15819	-0.20231	-0.25406	-0.20389	-0.30944	-0.54097	-0.02696	-0.10096	-0.14714	-0.01032	0.291525	-0.10563	-0.544	0.37296	-0.21032	-0.26747	-0.08589	0.300153
13.281	-0.34871	-0.34871	0.029385	-0.32493	-0.43882	-0.07719	-0.1235	0.083902	-0.64154	0.012009	0.014352	-0.36959	-0.36653	-0.03908	0.010935	-0.63889	-1.06983	0.045625	-0.11261	-0.14638	-0.11371	-0.415	-0.33928	-0.09262	-0.68598	-0.23612	-0.53196	-0.11571	-0.17414	-0.34848	-0.21036	-0.6059	0.569801	-0.25216	0.297867	0.452565	0.057803
13.5521	0.433337	0.433337	0.428265	1.69979	0.238055	0.235186	0.511921	1.12765	1.66506	0.55094	0.688542	6.52211	1.60903	0.425135	0.169065	0.770301	1.01507	1.84062	0.200215	3.56816	6.12759	1.18344	3.39419	2.47748	4.44573	0.791664	1.85545	1.275	0.472608	3.34782	1.66633	7.69881	4.99287	2.14512	3.49673	2.55513	1.25533
13.8231	1.17693	1.17693	0.712285	2.89073	0.844175	0.46033	0.787392	1.63703	2.69176	0.90677	0.949842	8.94431	3.28847	0.681475	0.537104	1.40705	2.79657	2.77999	0.311634	6.40092	9.59119	1.53813	5.15219	4.16907	7.84593	1.73937	2.55521	1.99085	1.21835	6.42772	2.93153	12.3195	8.68291	3.86247	4.86605	3.97393	3.20816
14.0942	0.721797	0.721797	0.434555	1.97315	0.498565	0.301463	0.766552	1.86516	2.46266	0.74301	0.480482	7.25821	2.53125	0.598345	0.383884	0.868591	2.46767	2.30875	0.250884	5.74046	7.91229	0.99907	4.03918	3.12234	6.16913	1.2018	2.33487	1.84194	0.743937	5.07822	1.91239	10.2258	8.34354	2.71791	3.94844	3.11069	2.76181
14.3652	1.04872	1.04872	0.505615	2.09403	0.338915	0.337039	0.849892	1.3714	1.86146	0.779119	1.00307	6.08591	2.1268	0.592565	0.294465	0.746791	1.63807	1.9725	0.160255	5.28774	7.26649	1.14594	3.48054	3.12608	5.53613	1.34231	2.30581	1.69576	0.665438	4.44993	2.04921	10.3337	7.56753	3.04818	3.16151	2.88845	2.64743
14.6362	0.644877	0.644877	0.618145	1.67232	-0.0588	0.237132	0.788542	1.25265	2.16206	0.8761	0.824032	6.02761	2.16514	0.518375	0.339174	0.772431	1.67427	1.90562	0.156895	4.65092	7.25089	0.82563	3.27692	2.92421	5.06802	1.06617	1.84334	1.56871	0.680798	4.88183	1.50529	8.5321	7.57206	2.77369	2.51663	2.58932	1.72998
14.9073	0.638456	0.638456	0.528455	1.62562	-0.02725	0.257602	0.860302	0.996402	2.43586	0.860059	0.791772	6.04431	2.23181	0.434374	0.386614	0.842951	1.77357	1.6825	0.232344	4.08842	6.04249	0.82406	2.91764	2.9429	4.00152	0.884803	2.13633	1.20123	0.617668	3.83873	1.46193	7.24641	6.36391	2.63049	2.73254	2.30727	1.37149
15.1783	0.055127	0.055127	0.481145	1.45666	-0.12141	0.181094	0.609142	1.20578	1.67696	0.844709	0.882092	4.71931	1.86458	0.414455	0.288465	0.442311	1.43677	1.48812	0.133885	3.57829	5.00259	0.63343	2.73534	2.6158	3.30472	1.05636	1.62785	1.04822	0.532338	3.73522	1.05991	6.98771	6.52003	1.9958	2.61038	1.98247	1.11676
15.4494	0.426926	0.426926	0.285905	1.02672	-0.08892	0.184016	0.699421	1.17766	2.25726	0.857229	0.896612	4.51371	1.69903	0.371435	0.070904	0.239321	1.26177	1.22938	0.054914	3.79281	4.17969	0.32719	2.35048	2.60084	3.27813	0.953433	1.41719	0.852863	0.612548	3.38313	0.870152	6.521	5.63541	1.90872	2.43423	1.68334	0.968183
15.7204	0.298717	0.298717	0.449225	1.24925	-0.11664	0.045131	0.675111	0.893282	1.37036	0.797999	0.657902	3.69151	1.78291	0.396264	0.169065	0.355771	0.91507	1.3175	0.105744	3.21849	3.75959	0.04906	2.15751	2.58589	2.73163	0.817814	1.53584	0.817353	0.532338	3.28242	0.729392	6.2893	4.82545	1.72165	1.58764	1.61495	0.775383
15.9914	0.401287	0.401287	0.274255	1.05557	-0.23852	0.160624	0.565161	0.980782	1.53106	0.79705	0.730482	3.93601	1.42513	0.289165	0.263935	0.417741	1.14987	1.33625	0.057154	3.30296	3.06509	0.31469	1.96242	1.75599	2.98952	0.863554	1.53342	0.817353	0.269537	3.19862	0.622412	5.4448	5.34354	1.67812	1.32629	1.37565	0.542483
16.2625	0.439747	0.439747	0.224155	0.76298	-0.62668	0.096782	0.568642	1.03078	1.39116	0.73688	0.938542	2.56651	1.44014	0.290604	0.077455	0.356841	0.68347	1.18813	0.121735	2.98876	3.60499	-0.10406	1.73427	2.30925	2.36992	0.680553	1.33971	0.428004	0.371927	2.76932	0.407882	4.5274	5.22138	1.53152	0.775147	1.43548	0.235283
16.5335	-0.18205	-0.18205	0.330405	0.901719	-0.61567	0.124072	0.620711	0.877652	1.86446	0.83693	0.906292	2.39151	1.19736	0.249895	0.105265	0.209401	0.49987	1.01687	0.042455	2.59349	3.09639	0.01625	1.43683	1.8943	1.64383	0.633164	1.27191	0.646584	0.257597	3.08213	0.689982	4.47661	4.58111	1.42812	1.38026	1.23035	0.084343
16.8046	0.343587	0.343587	0.268195	0.85776	-0.77868	0.062182	0.596411	0.574532	1.16206	0.808849	0.965962	2.13871	1.05514	0.286844	0.074735	0.068381	0.40517	0.733125	0.102705	2.57492	3.36889	-0.25719	1.69377	1.95785	2.08403	0.513884	1.09274	0.492214	0.467488	2.47613	0.374662	3.829	3.60825	1.17301	0.897297	1.11923	0.181633
17.0756	0.343587	0.343587	0.183615	0.69293	-0.62095	0.160624	0.594102	1.02765	1.13826	1.03608	0.741772	2.40821	0.957922	0.084484	0.153244	0.166671	0.20647	0.745005	0.048845	2.47694	2.30989	-0.31813	1.60954	1.82888	1.59993	0.638073	1.03947	0.198504	0.172267	2.08082	0.348192	3.64011	3.7802	0.899879	0.459797	0.956835	0.080803
17.3467	0.087187	0.087187	0.151465	0.90035	-0.63909	0.209842	0.452892	0.621402	0.88826	0.99998	0.759512	1.58591	0.948472	0.106424	0.152694	0.181621	0.03147	0.671255	0.050435	2.51242	2.40889	-0.48219	0.914449	1.45692	1.29672	0.492644	0.935346	0.287294	0.202988	2.26673	0.289642	3.68131	3.96346	0.684238	0.286507	0.495305	0.280683
17.6177	0.401287	0.401287	0.031705	0.40859	-0.69455	0.10702	0.507292	0.618282	0.69776	1.28549	0.793392	1.63601	0.720702	0.161555	0.193595	-0.05235	-0.58103	0.720005	0.019275	2.35363	1.52349	-0.48531	1.12874	1.5728	1.31533	0.306363	1.1799	0.105604	0.458958	1.86742	-0.31847	3.0036	3.19196	0.756678	0.124577	0.871365	0.182223
17.8887	0.196157	0.196157	0.116985	0.230009	-0.53968	0.121638	0.504981	0.658902	0.62636	1.10876	0.724032	0.86931	0.767361	0.103824	0.139614	-0.18589	-0.40673	0.750625	-0.07217	1.83335	1.78729	-0.15718	0.906989	1.52234	0.933725	0.342313	1.24044	0.183474	0.469198	1.87532	-0.07128	3.0829	2.85487	0.817909	0.519467	0.845725	0.224083
18.1598	0.099996	0.099996	0.188985	0.092649	-0.6912	0.014422	0.628821	0.465152	0.71856	1.32372	0.546612	0.81931	0.805142	0.159254	0.145065	-0.38248	-0.59683	0.601875	-0.11548	1.9989	1.34119	-0.39469	0.97201	1.09243	0.528125	0.401143	1.03947	0.083743	0.197867	1.82163	0.413512	2.7258	2.88654	0.876758	-0.37826	1.13633	0.357343
18.4308	0.234617	0.234617	0.195505	0.243749	-0.85469	0.057795	0.374192	0.440152	0.05786	1.18922	0.546612	0.66101	0.666802	0.194185	0.087265	-0.37393	-0.92513	0.530625	-0.12859	1.44146	1.44179	-0.32125	0.449629	1.03823	0.962925	0.350494	0.782806	0.019534	0.206398	1.84783	0.180402	2.40521	3.22364	0.776748	-0.34133	0.589315	0.225853
18.7019	-0.23333	-0.23333	0.169175	0.2671	-1.00479	0.052439	0.426271	0.568282	-0.23384	1.23735	0.845002	0.68041	0.433472	0.027325	0.122164	-0.30235	-1.28953	0.570625	-0.17383	1.94316	0.69179	-0.63375	0.206549	1.00645	1.02412	0.129904	0.528577	0.045494	0.330977	1.69473	0.229952	2.4163	2.85938	0.623348	-0.07145	0.213255	-0.03889
18.9729	-0.06666	-0.06666	0.168245	0.29595	-1.12954	0.064135	0.532752	0.633912	0.07576	1.04434	0.620802	-0.20569	0.466811	0.117105	0.155964	-0.29808	-1.07773	0.528125	-0.12428	1.53437	1.10499	-0.53375	0.462419	0.729816	0.601225	0.098853	0.342136	0.137023	0.045988	2.20653	0.101572	1.94961	4.30056	0.560768	-0.55724	0.008115	-0.05658
19.2439	0.151287	0.151287	0.151935	0.17507	-0.96319	0.031482	0.322112	0.449532	0.33166	1.05921	0.661122	-0.59179	0.605132	0.098054	-0.00761	-0.27243	-1.12973	0.358125	-0.17543	1.51072	1.81859	-0.68843	0.462419	0.490567	0.408425	0.120094	0.412347	0.081013	0.300257	1.62013	-0.21824	1.45751	4.24853	0.499539	-0.8811	0.563675	-0.11613
19.515	0.311536	0.311536	0.133295	-0.05158	-0.88098	0.046588	0.121872	0.433902	0.14716	1.07171	0.414352	-0.41959	0.232912	0.038585	-0.00216	-0.2265	-0.99683	0.460625	-0.22786	1.73538	1.32379	-0.6275	0.140459	0.473737	0.481625	0.180553	0.129056	0.078274	0.247358	1.45653	0.059352	0.987705	3.87975	0.360428	-0.3669	0.384185	-0.23229
19.786	-0.23974	-0.23974	0.136785	0.040449	-1.02152	0.011012	-0.02743	0.162032	-0.46294	0.98441	0.445002	-0.52239	0.470142	0.038585	-0.04632	-0.49252	-1.34093	0.331255	-0.15464	1.0462	1.14149	-0.89782	0.1138	0.443837	0.195725	0.340684	0.344546	0.161614	-0.06322	0.955125	-0.11859	1.19091	4.44762	0.441039	-0.75042	0.093595	-0.09019
20.0571	-0.35512	-0.35512	0.126305	0.190179	-1.05594	-0.04941	0.260761	0.030782	-0.32904	0.80932	0.348222	-0.72239	0.416252	0.046665	-0.07631	-0.48718	-1.59613	0.221874	-0.09838	1.13066	0.11019	-0.78218	-0.26892	0.511127	0.417725	-0.12664	0.388137	-0.18812	0.146678	1.14623	-0.2098	1.36711	3.67161	0.394779	-0.90383	0.093595	-0.17214
20.3281	-0.50256	-0.50256	-0.09853	-0.02548	-1.12716	-0.0421	0.261921	0.305782	-0.04924	0.91668	0.422422	-0.85849	0.302362	0.065425	0.181055	-0.5812	-2.01853	0.225624	-0.09806	0.716814	0.28389	-0.83532	-0.25826	0.673737	-0.07427	-0.1152	0.366337	-0.21818	-0.07858	0.840025	-0.0375	1.1782	4.17612	0.331178	-0.86974	0.067945	-0.19927
20.5991	0.035896	0.035896	-0.06149	-0.08729	-1.05928	0.025149	0.059372	-0.25984	0.13826	1.12291	0.474032	-0.84459	0.520141	-0.08353	0.047465	-0.44979	-1.91913	0.129374	-0.17446	0.988764	0.25609	-0.87906	-0.22841	0.827016	0.158425	-0.20507	0.247697	-0.09795	0.172267	0.679025	-0.08536	1.575	3.74853	0.134228	-1.52883	0.332905	-0.50882
20.8702	-0.12435	-0.12435	0.061765	-0.15597	-1.26769	-0.0309	-0.22882	-0.04734	-0.20404	1.15642	0.575642	-0.42239	0.210141	-0.09479	0.049104	-0.51816	-1.95663	0.005624	-0.12827	1.30802	0.16409	-1.04313	-0.57809	1.06253	0.089325	-0.08906	0.535837	-0.22774	-0.06322	1.19602	-0.10113	0.457505	3.29151	-0.02053	-1.1794	0.649145	-0.4929
21.1412	0.112816	0.112816	-0.01256	-0.19443	-1.55163	0.065593	-0.10845	-0.20984	-0.53144	0.93981	0.486932	-1.06959	0.411812	-0.046	0.122164	-0.44338	-2.09883	0.179375	-0.30346	0.797884	0.35849	-1.13063	-0.56636	0.518597	-0.02107	-0.07762	0.499517	-0.31107	-0.02739	0.959125	0.068912	0.475005	3.54943	0.005329	-1.33565	0.008115	-0.4817
21.4123	-0.30384	-0.30384	0.086225	-0.09691	-1.57027	-0.04551	-0.18947	-0.21922	-0.41834	1.05307	0.377262	-0.84179	0.288472	-0.03273	0.025655	-0.62607	-2.30993	0.131245	-0.26686	1.02423	0.17969	-1.25406	-0.25293	0.389626	0.094625	-0.02207	0.148427	0.168444	0.102298	1.01933	-0.05214	0.730605	2.85712	-0.12631	-1.2561	-0.20555	-0.3172
21.6833	-0.34871	-0.34871	-0.00487	-0.13949	-1.92878	-0.00409	-0.02164	-0.4661	-0.60284	0.98204	0.359512	-1.13069	0.297361	0.017795	-0.00761	-0.46902	-2.65013	0.146874	-0.25982	0.831674	-0.43491	-1.03531	-0.26466	0.077477	-0.34018	-0.33252	-0.06949	-0.10479	-0.05469	0.885825	-0.28919	0.352805	3.06301	-0.03481	-1.5402	-0.12008	-0.16449
21.9544	-0.16281	-0.16281	0.017735	-0.18482	-2.02152	-0.01189	-0.05868	-0.40047	-0.27844	0.935089	0.267582	-1.90849	0.112922	-0.03734	-0.01906	-0.49572	-2.67973	0.139995	-0.15784	0.578294	-0.29771	-1.1775	-0.40645	0.470006	-0.25778	-0.23612	0.291287	-0.05971	0.052817	0.448625	-0.35563	1.1194	3.36617	-0.08617	-1.31008	-0.45342	-0.1975
22.2254	-0.17564	-0.17564	-0.02352	-0.12575	-2.01578	0.083628	-0.02859	-0.28172	-0.27544	0.98252	0.398222	-1.64179	0.295142	-0.02609	-0.01088	-0.76282	-2.56653	0.209995	-0.12412	0.649234	-0.15021	-0.90718	-0.37767	0.126076	-0.23248	0.038403	0.482566	0.030463	0.057938	0.308525	0.006982	0.829005	3.41595	-0.08923	-1.67088	-0.29957	-0.31011
22.4964	-0.37435	-0.37435	-0.03213	-0.3057	-2.13481	-0.02359	-0.19294	-0.49109	-0.67424	0.891669	0.148222	-1.02239	0.124032	-0.03446	0.069815	-0.97222	-2.58623	0.183125	-0.25423	0.911064	-0.38801	-1.35563	-0.46296	-0.47579	-0.14738	-0.18383	-0.00169	-0.15943	-0.01544	0.303325	-0.03131	1.1099	2.925	0.141379	-1.37542	0.136325	-0.20339
22.7675	-0.29102	-0.29102	0.039165	-0.19581	-2.05259	0.001757	-0.20451	-0.53485	-1.09094	0.567929	0.083712	-1.97509	0.169581	-0.0691	-0.1014	-0.92948	-2.79943	0.211254	-0.25647	0.350254	-0.13631	-1.38687	-0.22734	-0.13934	0.068025	0.026953	0.032207	-0.18948	0.037457	0.724825	-0.15068	1.18931	3.26437	-0.08379	-1.65951	0.102135	-0.26412
23.0385	-0.15	-0.15	-0.10273	-0.36202	-2.15153	0.064135	-0.24039	-0.5911	-0.33494	0.72627	0.038542	-2.27519	0.027362	0.002495	-0.06268	-0.96367	-2.88893	0.176244	-0.27533	0.718494	-0.33251	-1.31188	-0.61967	-0.26458	0.020125	-0.00246	0.080626	0.050954	0.197867	0.613525	-0.27793	0.954405	3.24401	-0.25318	-1.87258	-0.40213	-0.10964
23.3096	-0.28461	-0.28461	-0.06708	-0.40597	-2.02247	0.005656	-0.21493	-0.5661	-1.04334	0.88601	0.303062	-1.59179	-0.00764	-0.05813	-0.09049	-0.78953	-2.56653	0.168125	-0.25055	0.971874	0.11889	-1.19	-0.69323	-0.21785	0.262125	-0.2737	-0.08159	-0.05014	0.245648	0.676325	-0.36295	1.1052	2.97704	-0.03243	-1.93508	0.025215	2.3e-05
23.5806	-0.5923	-0.5923	-0.1442	-0.53235	-2.08126	-0.03528	-0.24618	-0.49735	-0.71594	0.931549	-0.17275	-1.35569	0.119581	-0.00703	-0.01361	-0.74893	-2.70933	0.146874	-0.30682	0.846874	-0.56511	-1.1025	-0.56317	-0.21411	-0.04898	-0.08089	0.015247	-0.10752	-0.0581	0.770625	-0.60338	1.29251	2.90238	-0.19195	-2.27315	0.076495	-0.0271
23.8516	-0.03461	-0.03461	-0.14048	-0.45131	-2.23949	-0.11277	-0.19063	-0.08484	-0.49864	0.76991	-0.37274	-1.94459	-0.12486	-0.07603	-0.07304	-0.9562	-2.84423	0.196254	-0.36676	0.730324	-0.15541	-1.49781	-0.54291	-0.04963	-0.53307	-0.25736	0.083057	-0.1567	0.194457	0.413325	-0.56678	1.2528	3.05396	-0.19501	-2.06008	0.495305	-0.28476
24.1227	-0.06025	-0.06025	-0.12883	-0.39773	-2.47037	-0.01481	-0.26817	-0.42547	-0.91534	0.75434	-0.47597	-1.66409	-0.0693	-0.07285	0.020205	-0.75428	-3.05343	0.131245	-0.3348	0.710054	-0.42101	-1.14156	-0.47574	-0.05523	-0.67668	-0.03024	-0.11792	-0.27965	-0.05128	0.167225	-0.85732	1.7464	2.92953	-0.11678	-2.90951	0.392735	-0.09255
24.3937	-0.18846	-0.18846	-0.18009	-0.6285	-2.5349	-0.02359	-0.40359	-0.7786	-0.64744	0.58587	-0.58726	-1.70569	-0.05097	-0.0896	-0.0027	-0.89209	-3.10013	0.002505	-0.23553	0.623904	-1.35681	-1.26656	-0.35527	0.004576	-1.13677	-0.24919	-0.00169	-0.27009	-0.15537	0.531125	-0.70248	1.59881	3.38427	-0.12291	-2.42372	0.264525	-0.18511
24.6648	-0.13076	-0.13076	-0.18217	-0.57218	-2.41587	0.0115	-0.27743	-0.61922	-1.24574	0.47827	-0.42597	-1.84459	-0.11486	-0.03302	0.064374	-1.00214	-2.97773	0.056875	-0.29675	0.551264	-0.43661	-1.2275	-0.67084	-0.04028	-0.66067	-0.42566	0.024936	-0.1608	-0.1383	0.322925	-0.85225	1.4305	4.00871	-0.11746	-2.55156	0.349995	-0.38618
24.9358	-0.36154	-0.36154	-0.18149	-0.33592	-2.18978	0.10702	-0.3434	-0.45047	-0.55824	0.686619	-0.66629	-1.78909	0.019582	-0.06882	0.014745	-1.12286	-3.00803	0.053745	-0.34982	0.850254	-0.13451	-1.53063	-0.66124	0.013926	-1.20058	-0.28187	-0.01622	-0.1526	-0.10759	0.316425	-0.58593	1.2242	4.04038	-0.13924	-2.40667	0.255985	-0.66036
25.2069	-0.09871	-0.09871	-0.17356	-0.44581	-2.30641	-0.0002	-0.26817	-0.89422	-1.50464	0.52546	-0.8792	-1.98629	-0.14487	-0.1023	0.014745	-1.02991	-3.27113	0.113124	-0.369	0.257344	-0.36721	-1.19625	-0.68364	-0.11691	-1.16598	-0.26063	-0.10339	-0.20861	-0.14513	0.312525	-0.71937	1.48131	4.07885	-0.1923	-3.09417	0.238885	-0.55953
25.4779	-0.06666	-0.06666	-0.13627	-0.43482	-2.37237	0.061206	-0.2809	-0.87235	-0.83204	0.59436	-0.90339	-2.39179	0.481252	-0.04456	0.156514	-1.01389	-3.01653	0.022495	-0.33	0.233704	-0.34111	-1.03218	-0.67723	-0.34308	-1.41738	-0.20017	0.066097	-0.10615	0.051107	-0.06967	-0.5634	1.21791	4.52229	-0.14264	-3.53451	-0.16281	-0.61613
25.7489	-0.00897	-0.00897	-0.14863	-0.44718	-2.3217	0.061206	-0.23345	-1.0036	-1.65644	0.67742	-0.71468	-2.44739	0.174032	-0.10115	0.021834	-1.0203	-3.02513	0.138745	-0.39666	0.505664	-0.49041	-0.85875	-1.02372	-0.32813	-1.92138	-0.34886	-0.0138	-0.23593	-0.04957	0.283725	-0.13322	1.1115	3.7802	-0.04706	-3.48622	0.213255	-0.82191
26.02	-0.01538	-0.01538	-0.11648	-0.44581	-1.96129	-0.14249	-0.05752	-0.49735	-1.61474	0.551179	-0.83565	-1.90019	0.075692	-0.02262	-0.00816	-0.94551	-3.54943	0.176244	-0.43933	0.370524	-0.15881	-1.08375	-0.84674	-0.5356	-1.76177	-0.30148	-0.16392	-0.04331	0.020387	0.332125	0.198422	0.602005	3.75532	-0.07937	-3.19645	0.315815	-0.64502
26.291	-0.2782	-0.2782	-0.12323	-0.52411	-1.93834	-0.05137	-0.21493	-1.0286	-1.66234	0.51437	-0.85661	-2.26679	0.000702	-0.11067	0.018024	-0.87607	-3.43633	0.219375	-0.38914	-0.1109	-0.38281	-1.09313	-1.01946	-0.51878	-1.85888	-0.07272	0.146007	-0.43538	0.168857	0.791525	0.073992	0.316305	3.94762	-0.42257	-3.93224	0.349995	-0.6686
26.5621	0.048717	0.048717	-0.21176	-0.64361	-1.87285	0.032946	-0.38044	-1.14109	-1.47484	0.753869	-0.83242	-2.35289	0.131252	-0.06246	0.204494	-0.75214	-3.51263	0.068124	-0.38691	0.108704	0.01649	-1.02906	-0.94376	-0.64402	-1.62217	-0.38481	-0.27288	-0.29058	-0.05128	0.603025	0.250232	0.452805	3.86166	-0.20862	-3.79588	0.161965	-0.72168
26.8331	-0.33589	-0.33589	-0.15794	-0.68207	-1.80497	0.030993	-0.30058	-0.6661	-1.26354	0.82253	-0.78404	-2.16679	-0.03931	-0.04168	0.086725	-0.97757	-3.64283	0.004994	-0.42479	-0.28995	-0.39671	-0.79469	-1.16871	-0.62159	-1.88948	-0.42893	-0.09128	-0.16626	-0.10759	0.391025	0.453492	0.067105	3.76437	-0.3678	-3.96065	0.213255	-0.67569
27.1041	-0.00897	-0.00897	-0.11182	-0.72053	-2.01052	-0.04162	-0.23345	-0.60672	-1.65944	0.702429	-0.95823	-2.62239	-0.0132	-0.06563	0.145065	-0.94765	-3.39023	0.319374	-0.33831	-0.22239	0.05819	-0.43219	-0.95016	-0.33187	-2.06898	-0.1152	-0.05496	-0.39303	0.151797	0.083425	0.276682	0.633705	3.32998	-0.35692	-4.03735	0.085035	-0.66625
Fig. 1 G
Delta F/F in muscle (%)
Herm-cond	13.46	13.46	13.49	19.56	6.31	13.02	29.48	17.71	11.29	18.53	14.34	22.82	17.58	20.88	9.87	11.93	8.48	26.96	6.33
Male-cond	24.5	25.26	11.5	22.98	20.56	25.41	21.09	20.88	24.96	25.71	23.47	19.04	22.67	29.84	23.37	18.17	30.15	31.6
Fig. 1 I
mEPSC rate
Herm-cond	49.3	33.2	62.7	34	63.3	35.6	51.7	46.5	67.5	50.7	43.2	43.5	52.3
Male-cond	96.4	59.1	66.4	85	58.7	62.9	30.1	107.1	54.7	39.1	58	62.3
Fig. 1 J
mEPSC amp
Herm-cond	27.2	21.8	31.2	27.2	22.4	19.1	24.8	17	23.8	27	23.4	24.6	32.8
Male-cond	23.2	22.6	28.7	28.1	23.3	24.3	21.9	26.1	23.3	24.7	23.2	22.8
Fig. 1 L
mIPSC rate
Herm-cond	40.9	22.6	40	29.3	43.2	28.3	27.2	29.1	69.6	30.9	43.1	43.5	62.9	34.7	47.1
Male-cond	73.2	55.7	24.7	63.6	49.7	20.5	45.1	35.1	15.2	68.1	59	26.2	59.5	45	32.6	40.7	39.4
Fig. 1 M
mIPSC amp
Herm-cond	26.2	19.5	23.7	19.3	16.9	25.5	22.9	21.9	30.6	23.7	27.4	23.5	32.3	19	15.2
Male-cond	21.6	24.9	21.7	18.4	21.6	20.5	31.6	24.9	24	23.9	24.8	16.5	30.7	28.4	25.6	22.5	24.8
