# Supplementary material for: Male pheromones modulate synaptic transmission at the C. elegans neuromuscular junction in a sexually dimorphic manner
Source: eLife. 2021 Mar 31;10:e67170. doi: 10.7554/eLife.67170 (PMC8051947; doi:10.7554/eLife.67170)
Supplement: Figure 2—figure supplement 1—source data 1. [file elife-67170-fig2-figsupp1-data1.xlsx]

## Sheet: Figure 2-figure supplement 1
Figure 2- figure supplement 1A				Egg
time/min	Herm-cond			Male-cond
0	0	0	0	0	0	0
10	0	0	0	0	0	0
20	0	0	0	0	0	0
30	0	0	0	0	0	0
40	0	0	0	0	0.04	0
50	0	0	0.0384615	0	0.16	0.0740741
60	0	0.08	0.0769231	0.107143	0.32	0.259259
70	0.08	0.36	0.307692	0.285714	0.64	0.481481
80	0.32	0.48	0.576923	0.535714	0.84	0.814815
90	0.52	0.72	0.692308	0.75	0.96	0.888889
100	0.68	0.8	0.807692	0.892857	1	0.888889
110	0.84	0.88	0.884615	0.964286	1	1
120	0.92	0.96	0.923077	1	1	1
Figure 2- figure supplement 1B				L1
time/min	Herm-cond			Male-cond
0	0	0	0	0	0	0
10	0	0	0	0	0	0
20	0	0	0	0	0	0
30	0	0	0	0	0	0
40	0	0	0	0	0.04	0
50	0	0	0.0384615	0	0.16	0.0740741
60	0	0.08	0.0769231	0.107143	0.32	0.259259
70	0.08	0.36	0.307692	0.285714	0.64	0.481481
80	0.32	0.48	0.576923	0.535714	0.84	0.814815
90	0.52	0.72	0.692308	0.75	0.96	0.888889
100	0.68	0.8	0.807692	0.892857	1	0.888889
110	0.84	0.88	0.884615	0.964286	1	1
120	0.92	0.96	0.923077	1	1	1
Figure 2- figure supplement 1C				L2-L3
time/min	Herm-cond			Male-cond
0	0	0	0	0	0	0
10	0	0	0	0	0	0
20	0	0	0	0	0	0
30	0	0	0	0	0	0
40	0	0.0322581	0	0.0740741	0.037037	0.0384615
50	0.0357143	0.0322581	0.0740741	0.148148	0.111111	0.153846
60	0.0357143	0.0645161	0.0740741	0.37037	0.37037	0.346154
70	0.107143	0.129032	0.185185	0.666667	0.703704	0.769231
80	0.25	0.225806	0.37037	0.814815	0.814815	0.846154
90	0.535714	0.451613	0.518519	0.925926	0.962963	0.884615
100	0.714286	0.645161	0.666667	1	1	0.961538
110	0.928571	0.806452	0.851852	1	1	1
120	0.964286	0.935484	0.925926	1	1	1
Figure 2- figure supplement 1D				Mid-L4
time/min	Herm-cond			Male-cond
0	0	0	0	0	0	0
10	0	0	0	0	0	0
20	0	0	0	0	0	0
30	0	0	0	0	0	0
40	0	0.0322581	0	0	0	0
50	0.0357143	0.0322581	0.0740741	0	0	0
60	0.0357143	0.0645161	0.0740741	0.0416667	0.04	0.037037
70	0.107143	0.129032	0.185185	0.125	0.24	0.111111
80	0.25	0.225806	0.37037	0.291667	0.48	0.333333
90	0.535714	0.451613	0.518519	0.5	0.64	0.481481
100	0.714286	0.645161	0.666667	0.791667	0.8	0.666667
110	0.928571	0.806452	0.851852	0.875	0.88	0.851852
120	0.964286	0.935484	0.925926	0.958333	0.92	0.962963
Figure 2- figure supplement 1E
time/min	Herm-cond			Male-cond			L4 out			Adult out
0	0	0	0	0	0	0	0	0	0	0	0	0
10	0	0	0	0	0	0	0	0	0	0	0	0
20	0	0	0	0	0	0	0	0	0	0	0	0
30	0	0	0	0	0	0	0	0	0	0	0	0
40	0	0	0	0	0	0	0	0	0	0	0	0
50	0	0	0.0416667	0.148148	0.107143	0.185185	0.037037	0	0.037037	0.125	0.0833333	0.0357143
60	0.0714286	0.148148	0.166667	0.333333	0.321429	0.407407	0.148148	0.0689655	0.185185	0.25	0.25	0.178571
70	0.357143	0.444444	0.458333	0.740741	0.785714	0.814815	0.407407	0.241379	0.481481	0.666667	0.75	0.571429
80	0.678571	0.777778	0.75	0.962963	0.964286	0.962963	0.666667	0.655172	0.851852	0.875	0.916667	0.928571
90	0.857143	0.888889	0.958333	1	1	1	0.925926	0.896552	0.962963	1	1	1
100	0.928571	0.962963	1	1	1	1	1	1	1	1	1	1
110	1	1	1	1	1	1	1	1	1	1	1	1
120	1	1	1	1	1	1	1	1	1	1	1	1
