# Supplementary material for: Male pheromones modulate synaptic transmission at the C. elegans neuromuscular junction in a sexually dimorphic manner
Source: eLife. 2021 Mar 31;10:e67170. doi: 10.7554/eLife.67170 (PMC8051947; doi:10.7554/eLife.67170)
Supplement: Figure 2—figure supplement 2—source data 1. [file elife-67170-fig2-figsupp2-data1.xlsx]

## Sheet: Figure 2-figure supplement 2
Figure 2-figure supplement 2
time/min	TR389 (N2 Herm-cond)			TR389 (N2 Male-cond)
0	0	0	0	0	0	0
10	0	0	0	0	0	0
20	0	0	0	0	0	0
30	0	0	0	0	0	0
40	0	0	0	0	0	0
50	0	0	0	0	0	0
60	0	0	0	0.05	0	0
70	0	0	0	0.05	0.037037	0
80	0	0	0	0.1	0.037037	0
90	0.04	0.0333333	0.0384615	0.15	0.111111	0.0384615
100	0.2	0.1	0.0384615	0.35	0.259259	0.192308
110	0.32	0.166667	0.230769	0.7	0.518519	0.5
120	0.48	0.466667	0.423077	0.9	0.814815	0.730769
130	0.68	0.8	0.807692	1	0.962963	0.961538
140	0.88	0.866667	0.923077	1	1	1
