# Supplementary material for: Male pheromones modulate synaptic transmission at the C. elegans neuromuscular junction in a sexually dimorphic manner
Source: eLife. 2021 Mar 31;10:e67170. doi: 10.7554/eLife.67170 (PMC8051947; doi:10.7554/eLife.67170)
Supplement: Figure 2—figure supplement 3—source data 1. [file elife-67170-fig2-figsupp3-data1.xlsx]

## Sheet: Figure 2-figure supplement 3
Figure 2-figure supplement 3A				Curvature (radians)
herm-cond	9.24451	9.67174	10.3494	12.0484	12.5555	12.6482	17.1027	9.36627	11.5529	9.63438	11.7209	17.0799	9.70236	10.0144	10.5021	11.0799	10.5645	11.9327	9.44418	9.75808	12.3159	8.89234	9.91669	12.7696	9.49971	12.375	10.6348	11.6618	11.3151	8.28937	12.3523	10.6107	11.6468	10.4631	9.92283	10.3217	12.5763	11.1918	8.91284	15.1642	10.1053
male-cond	10.5563	11.7524	10.2649	13.886	10.6722	13.2065	10.8378	12.9093	11.9493	9.82984	10.4863	10.7263	10.2379	10.6136	10.4288	9.58505	11.2844	10.9173	14.8934	11.1654	9.60999	10.3214	9.25294	10.4958	10.7795	12.2947	10.9152	11.4808	9.38541	10.8632	12.787	13.2631	9.55544
Figure 2-figure supplement 3C				Curvature (radians)
Herm.	11.1629	9.09191	9.57913	15.6343	8.56677	11.4941	10.359	11.8439	10.2026	9.49532	10.8727	10.3445	12.3872	10.3411	11.5129	8.63794	9.21043	12.0016	11.1798	9.39399	8.05211	11.2878	11.1615
Male	13.8297	16.9929	13.7034	13.867	16.9318	15.8055	14.7513	21.0146	14.1217	16.1112	15.8045	14.3756	13.508	12.1401	16.1043	12.6975	19.6022	14.2826	12.6074	10.4336	14.679	13.5005	21.0169	18.5219	14.8181	17.7848	12.6704	11.6339	18.8116	15.755
