# Supplementary material for: Male pheromones modulate synaptic transmission at the C. elegans neuromuscular junction in a sexually dimorphic manner
Source: eLife. 2021 Mar 31;10:e67170. doi: 10.7554/eLife.67170 (PMC8051947; doi:10.7554/eLife.67170)
Supplement: Figure 2—figure supplement 4—source data 1. [file elife-67170-fig2-figsupp4-data1.xlsx]

## Sheet: Figure 2-figure supplement 4
Figure 2-figure supplement 4
time (hour)	Herm-cond																						Male-cond
	1	2	3	4	5	6	7	8	9	10	11	12	13	14	15	16	17	18	19	20	21	22	1	2	3	4	5	6	7	8	9	10	11	12	13	14	15	16	17	18
8	22	21	24	20	20	25	24	17	19	27	25	14	22	17	22	29	18	21	23	24	18	26	14	15	20	25	26	16	19	18	19	13	22	24	17	12	21	18	18	20
16	45	55	47	45	41	56	67	48	48	71	51	51	26	41	41	66	41	48	53	51	49	45	52	54	45	80	58	36	57	42	56	48	67	69	58	48	49	53	52	47
24	79	104	86	91	78	91	106	74	100	118	86	88	62	77	70	101	74	82	93	86	95	86	97	104	88	117	109	71	103	80	91	88	109	105	90	95	90	90	94	86
32	114	158	136	135	114	147	148	110	148	147	133	142	104	120	110	155	115	127	137	121	142	134	140	148	131	158	160	120	155	127	143	135	162	151	137	138	140	135	145	137
40	153	201	176	181	162	197	176	149	185	187	181	189	149	155	158	211	164	183	173	159	191	171	186	190	184	197	202	156	199	172	170	179	205	198	183	181	194	178	202	182
48	180	227	206	228	218	245	192	183	231	239	232	243	197	198	213	255	203	191	207	178	231	217	229	241	233	216	263	188	243	212	198	206	260	234	225	222	239	228	257	213
56	207	255	235	272	255	260	197	217	256	289	263	266	236	215	248	291	232	216	230	194	256	262	264	274	261	245	307	215	259	231	226	218	280	267	265	255	264	256	302	222
64	222	257	253	308	275	283	198	227	271	305	270	272	250	235	257	301	265	243	239	230	279	294	302	292	269	260	319	232	266	242	264	220	305	318	276	280	269	260	311	223
72	230	261	261	327	286	285	198	228	276	306	272	274	252	242	261	302	289	259	240	231	283	306	308	298	271	266	326	246	271	245	284	228	308	333	277	285	272	261	322	225
80	240	262	266	333	290	285	198	230	277	307	273	283	252	245	261	304	297	261	241	232	285	312	314	298	271	270	332	251	272	247	293	228	315	343	278	288	273	262	326	229
