# Supplementary material for: Male pheromones modulate synaptic transmission at the C. elegans neuromuscular junction in a sexually dimorphic manner
Source: eLife. 2021 Mar 31;10:e67170. doi: 10.7554/eLife.67170 (PMC8051947; doi:10.7554/eLife.67170)
Supplement: Figure 2—source data 1. [file elife-67170-fig2-data1.xlsx]

## Sheet: Fig 2
Fig. 2 B
	Herm-cond			Male-cond (egg)			Herm-cond			Male-cond (L1 stage)			Herm-cond			Male-cond (L2-L3 stage)			Male-cond (Mid-L4 stage)
Paralyzed % (70 min)	66.67	53.57	45.16	100	96.15	81.48	8	36	30.77	28.57	64	48.15	10.71	12.9	18.52	66.67	70.37	76.92	12.5	24	11.11
Fig. 2 C
	Herm-cond	Male-cond	L4 out	Adult out
Paralyzed % (70 min)	35.71	74.07	40.74	66.67
	44.44	78.57	24.14	75
	45.83	81.48	48.15	57.14
Fig. 2 D
Paralyzed %	CB4856 Herm-cond			CB4856 Male-cond
time/min	Blind No. 2	3	6	1	4	5
0	0	0	0	0	0	0
10	0	0	0	0	0	0
20	0	0	0	0	0	0
30	0	0	0	4.7619	5.26316	4.7619
40	0	0	0	19.0476	21.0526	9.52381
50	4.7619	5	9.09091	38.0952	52.6316	28.5714
60	23.8095	20	18.1818	57.1429	78.9474	42.8571
70	52.381	40	54.5455	76.1905	89.4737	71.4286
80	66.6667	70	72.7273	85.7143	100	80.9524
90	80.9524	80	86.3636	90.4762	100	95.2381
100	90.4762	95	95.4545	95.2381	100	100
110	100	100	100	95.2381	100	100
120	100	100	100	100	100	100
Fig. 2 E
	AB3 Herm-cond			AB3 Male-cond
time/min	Blind No. 2	4	5	1	3	6
0	0	0	0	0	0	0
10	0	0	0	0	0	0
20	0	0	0	0	0	0
30	0	0	0	0	0	0
40	0	0	0	0	0	0
50	0	0	0	4.16667	0	3.57143
60	3.57143	10.7143	3.57143	12.5	10.7143	14.2857
70	10.7143	14.2857	7.14286	25	25	28.5714
80	21.4286	28.5714	35.7143	58.3333	46.4286	53.5714
90	50	53.5714	71.4286	75	75	85.7143
100	85.7143	82.1429	92.8571	91.6667	89.2857	92.8571
110	92.8571	92.8571	100	95.8333	96.4286	96.4286
120	100	96.4286	100	100	100	100
Fig. 2 F
Paralyzed %	TR389 Herm-cond			TR389 Male-cond
time/min	Blind No. 2	3	6	1	4	5
0	0	0	0	0	0	0
10	0	0	0	0	0	0
20	0	0	0	0	0	0
30	0	0	0	0	0	0
40	0	0	0	0	0	0
50	0	0	0	0	0	0
60	0	0	0	0	0	0
70	0	0	0	0	0	0
80	0	0	0	0	0	0
90	0	0	0	4.16667	4	0
100	4	8	3.7037	4.16667	8	11.1111
110	16	20	14.8148	20.8333	16	37.037
120	36	44	44.4444	54.1667	44	59.2593
130	48	72	62.963	75	60	70.3704
140	76	88	77.7778	91.6667	88	88.8889
150	80	96	88.8889	95.8333	96	96.2963
Fig. 2 G
	N2 (N2 Herm-cond)	N2 (N2 Male-cond)	N2 (TR389 Herm-cond)	N2 (TR389 Male-cond)
Paralyzed % (80 min)	57.69	96	76	64.52
	46.43	87.1	62.07	70.37
	72.41	96.55	70.59	72.73
Fig. 2 H	Peristaltic Speed (um/s)
N2 Herm-cond	380.51	387.45	343.94	193.77	303.83	393.91	479.8	433.84	304.47	348	328.47	357.97	284.71	343.58	375.27	331.91	248.68	321.69	437.69	449.36	412.84	456.56	340.81	316.15		301.26	396.11	393.83	384.96	413.52	402.18	256.76	236.84	308.56	279.9	263.31	367.98	396.65	399.69	444.25	477.65	319.05	532.16	405.51	321.89	451.52	359.17	381.66	379.72
N2 male-cond	314.59	329.07	329.46	257.77	378.5	155.19	177.15	165.59	341.37	424.22	325.34	385.07	439.55	269.18	429.72	402.32	296.63	420.17	319.97	230.48	155.73	338.58	384.78	282.87	278.09	289.3	212.24	369.13	446.06	456.05	321.7	260.42	286.35	330.69	295.69	392	306.99	405.04	356	300.08	349.49	391.64	315.64	403.11	331.08	322.64	333.25	240.25	357.87
TR389 herm-cond	428.04	372.51	345.32	407.27	504.92	266.51	347.22	304.87	336.39	347.62	372.83	287.5	329.79	445.75	306.94	435.27	463.46	286.33	274.92	345.08	398.94	379.84	398.89	370.05	364.53	310.23	384.54	292.07	287.83	401.77	399.45	259.56	354.59
TR389 male-cond	344.79	370.38	487.42	309.1	338.63	320.84	313.85	338.41	396.51	428.85	322.31	435.95	408.58	383.77	325.23	357.53	348.49	355.76	335.24	312.75	446.92	323.06	387.56	424.47	337.77	383.62	356.49	380.49	353.86	429.46	380.31	245.71	373.85	389.89	302.9	343.3	324.45	333.58	388.49	381.04	302.84	371.27	357.75	474.84	293.98	393.6	268.08
Fig. 2 I	Mating efficiency (%)
Herm-cond	46.67	53.33	46.67	60	40	55.56	46.67	53.33	40	60	53.33
TR389 male-cond	60	53.33	66.67	73.33	66.67	66.67	80	73.33	53.33	73.33	66.67	53.33
Male-cond	80	60	73.33	66.67	86.67	77.78	73.33	86.67	73.33	86.67	73.33	68.75
[truncated: 12 more columns]
