# Supplementary material for: Male pheromones modulate synaptic transmission at the C. elegans neuromuscular junction in a sexually dimorphic manner
Source: eLife. 2021 Mar 31;10:e67170. doi: 10.7554/eLife.67170 (PMC8051947; doi:10.7554/eLife.67170)
Supplement: Figure 3—figure supplement 1—source data 1. [file elife-67170-fig3-figsupp1-data1.xlsx]

## Sheet: Figure 3-figure supplement 1
Figure 3-figure supplement 1A			N2 male
time/min	N2 Herm-cond			N2 Male-cond			daf-22 Herm-cond			daf-22 male-cond
0	0	0	0	0	0	0	0	0	0	0	0	0
10	0	0	0	0	0	0	0	0	0	0	0	0
20	0	0	0	0	0	0	0	0	0	0	0	0
30	0	0	0	0	0	0	0	0	0	0	0	0
40	0	0	0	0	0	0	0	0	0	0	0	0
50	0	0	0	0	0	0	0	0	0	0	0	0
60	0.0769231	0.0740741	0.103448	0.037037	0	0.0869565	0.04	0	0.0322581	0	0.0416667	0.0645161
70	0.269231	0.296296	0.241379	0.222222	0.2	0.347826	0.12	0.111111	0.16129	0.148148	0.166667	0.16129
80	0.615385	0.666667	0.413793	0.407407	0.56	0.565217	0.28	0.259259	0.451613	0.407407	0.458333	0.322581
90	0.730769	0.814815	0.62069	0.592593	0.72	0.73913	0.6	0.481481	0.612903	0.703704	0.666667	0.580645
100	0.884615	0.888889	0.827586	0.851852	0.92	0.869565	0.76	0.666667	0.83871	0.888889	0.916667	0.806452
110	1	0.962963	0.931034	0.962963	1	0.913043	0.92	0.888889	0.935484	0.962963	0.958333	0.935484
120	1	1	1	1	1	0.956522	1	0.925926	0.967742	1	1	1
Figure 3-figure supplement 1B			daf-22 hermaphrodite
	N2 Herm-cond			N2 Male-cond			daf-22 Herm-cond			daf-22 male-cond
0	0	0	0	0	0	0	0	0	0	0	0	0
10	0	0	0	0	0	0	0	0	0	0	0	0
20	0	0	0	0	0	0	0	0	0	0	0	0
30	0	0	0	0	0	0	0	0	0	0	0	0
40	0	0	0	0	0	0	0	0	0	0	0	0
50	0	0.0344828	0	0.04	0	0	0	0	0	0.037037	0	0
60	0	0.0344828	0	0.12	0.0714286	0.037037	0	0.0357143	0	0.037037	0	0
70	0.1	0.0689655	0.0769231	0.28	0.25	0.111111	0.115385	0.0714286	0.037037	0.111111	0.115385	0.0689655
80	0.166667	0.137931	0.115385	0.48	0.357143	0.296296	0.269231	0.178571	0.111111	0.222222	0.269231	0.137931
90	0.3	0.206897	0.192308	0.6	0.535714	0.444444	0.384615	0.285714	0.222222	0.296296	0.346154	0.172414
100	0.433333	0.37931	0.423077	0.8	0.678571	0.62963	0.5	0.392857	0.444444	0.444444	0.5	0.310345
110	0.566667	0.551724	0.538462	0.88	0.857143	0.740741	0.615385	0.607143	0.592593	0.62963	0.615385	0.482759
120	0.7	0.724138	0.807692	0.96	0.928571	0.925926	0.730769	0.785714	0.703704	0.740741	0.769231	0.689655
130	0.866667	0.827586	0.923077	1	0.964286	0.925926	0.884615	0.892857	0.851852	0.814815	0.846154	0.793103
