# Supplementary material for: Male pheromones modulate synaptic transmission at the C. elegans neuromuscular junction in a sexually dimorphic manner
Source: eLife. 2021 Mar 31;10:e67170. doi: 10.7554/eLife.67170 (PMC8051947; doi:10.7554/eLife.67170)
Supplement: Figure 3—figure supplement 2—source data 1. [file elife-67170-fig3-figsupp2-data1.xlsx]

## Sheet: Figure 3-figure supplement 2
Figure 3-figure supplement 2A
	N2 herm excre						N2 male excre						TR389 male excre
ascr#10	56700	41517	101955	88972	121411	119573	178738	69137	192448	367222	415614	351888	148265	154317	249386	283043	354509	264993
Figure 3-figure supplement 2B
	N2 male			daf-22 male
C3	18200	14248	16312	2378	1637	1906
C5	62351	45645	61409	4812	3808	4004
C6	11142	10108	10897	958	1755	890
C7	139667	112247	149568	3096	1669	2395
C8	6780	5166	6996	662	659	722
C9	628474	472061	644088	2214	1958	2186
C10	2990	2103	2979	3094	3100	2596
C11	16585	12376	17979	2076	1443	1862
C12	759	664	989	1566	1197	1197
C13	10452	8828	11655	3874	2943	2728
C14	828	879	1231	1003	803	857
C15	5009	4756	6284	3166	3851	2220
C16	859	715	1135	3499	2476	2547
C17	2617	3226	5064	7611	6169	7613
C18	1142	1177	1777	10383	7818	7982
C19	153	158	219	9907	7133	6824
C20	142	0	433	31210	23336	22769
C21	673	879	919	88120	63280	59240
Figure 3-figure supplement 2C
	N2 herm excretome						N2 male excretome						TR389 male excretome
C3	12167	11796	20900	12034	15354	20351	24851	18461	38253	14343	21176	14340	13707	16997	16199	11750	15192	12821
C5	54979	47771	104276	63907	85309	82277	20788	12064	33252	43233	49628	45605	47094	44656	70556	74004	88260	66783
C6	7957	8861	13495	18633	21456	26190	11489	5514	11940	18452	20376	19127	9312	11228	12917	29141	27386	27129
C7	71329	53808	125933	105240	134043	135547	59462	37345	94249	88142	102694	91556	60600	60427	52337	108476	134904	102263
C8	3421	2756	6618	5261	6777	7144	4859	2474	6725	8547	10105	8184	4261	4022	6936	8387	10320	7549
C9	62071	45636	111281	92001	125775	123908	184133	70362	196509	372498	421371	357896	152501	156737	256860	287342	359727	268892
C10	439	335	972	736	974	971	681	428	1168	1308	1554	1310	602	560	1000	1075	1289	965
C11	6917	5816	15504	12610	18364	18353	13385	7106	19666	25367	31242	28891	9073	8817	15262	19106	22828	16350
C12	546	497	1193	766	1024	1299	1155	805	2462	1657	1915	1773	645	479	1246	1140	1262	988
C13	633	572	1504	1191	1616	1721	1233	629	2048	2685	3061	3169	768	689	1400	1720	1771	1385
C15	1132	607	1734	1325	1237	1234	2107	1278	3500	2570	3685	2965	2400	1604	2422	1461	2124	1363
C16	380	275	712	503	767	718	2263	1498	2904	3186	3488	3488	762	852	1694	1627	1836	1306
C17	274	307	682	425	589	632	3384	2085	5898	5291	6922	5641	3216	3560	7014	3885	4106	3024
C18	395	420	1088	965	1100	1383	925	628	1097	1496	1727	1732	604	559	982	1266	1470	979
C19	157	138	259	206	169	238	198	169	398	366	463	423	196	226	232	187	220	349
C20	0	0	0				0	0	170	95	121	244	113	0	0
C21	251	400	527	238	413	476	327	267	653	510	689	595	387	366	400	288	341	290
