# Supplementary material for: Male pheromones modulate synaptic transmission at the C. elegans neuromuscular junction in a sexually dimorphic manner
Source: eLife. 2021 Mar 31;10:e67170. doi: 10.7554/eLife.67170 (PMC8051947; doi:10.7554/eLife.67170)
Supplement: Figure 3—source data 1. [file elife-67170-fig3-data1.xlsx]

## Sheet: Fig 3
Fig. 3 B
N2 hermaphrodite	N2 Herm-cond	N2 Male-cond	daf-22 Herm-cond	daf-22 Male-cond
Paralyzed % (70 min)	43.48	78.26	33.33	46.15
	31.82	75.86	45.83	47.83
	40	75	51.85	37.04
Fig. 3 C
daf-22 male	N2 Herm-cond	N2 Male-cond	daf-22 Herm-cond	daf-22 male-cond
Paralyzed % (100 min)	64	68	76.92	76
	80	62	60.87	68
	64	85	69.57	73
Fig. 3 E	β-hydroxylated ascaroside profiles in excretomes
Relative abundance	N2 herm excretome			N2 male excretome			TR389 male excretome
C9	87690	115300	115600	146900	167700	158800	152100	195500	146100
C11	240700	335400	332800	408900	478000	448600	356500	439300	328400
C13	379800	517700	550800	845000	1051000	1025000	570600	669400	482500
C14	33220	63430	74690	101500	154300	109100	45620	42690	28000
C15	206800	286700	296500	600200	658300	706200	281800	333600	240100
C16	2765	4095	4557	9983	11570	12430	5323	6475	4386
C17	41320	52620	56110	138000	159000	162100	67020	78520	58430
C18	13990	19000	25340	22360	25100	23630	19470	25440	15460
C19	6718	9051	11530	32760	41390	37590	17870	17760	15370
C20	13960	19260	21830	13950	17960	14750	17910	21780	15610
C21	23960	34870	66820	23110	28210	26030	52750	32050	25400
Fig. 3 F
	N2	dhs-28	maoc-1	acox-1.1
Paralyzed % (90 min)	15.38	75.86	46.43	35.48
	37.04	82.14	35.71	55.17
	33.33	66.67	58.62	23.33
Fig. 3 G
	N2 (Herm-cond)	N2 (Male-cond)	dhs-28 (Herm-cond)	dhs-28 (Male-cond)
Paralyzed % (70 min)	6.9	19.23	22.22	25
	13.79	28	37.04	36
	10	33.33	26.67	37.04
