# Supplementary material for: Male pheromones modulate synaptic transmission at the C. elegans neuromuscular junction in a sexually dimorphic manner
Source: eLife. 2021 Mar 31;10:e67170. doi: 10.7554/eLife.67170 (PMC8051947; doi:10.7554/eLife.67170)
Supplement: Figure 4—figure supplement 1—source data 1. [file elife-67170-fig4-figsupp1-data1.xlsx]

## Sheet: Figure 4-figure supplement 1
Figure 4-figure supplement 1A
	strong	weak	total
15min	11	6	23
30min	17	4	23
50min	19	5	24
	strong	weak
15min	0.478261	0.26087
30min	0.73913	0.173913
50min	0.791667	0.208333
