# Supplementary material for: Male pheromones modulate synaptic transmission at the C. elegans neuromuscular junction in a sexually dimorphic manner
Source: eLife. 2021 Mar 31;10:e67170. doi: 10.7554/eLife.67170 (PMC8051947; doi:10.7554/eLife.67170)
Supplement: Figure 4—figure supplement 2—source data 1. [file elife-67170-fig4-figsupp2-data1.xlsx]

## Sheet: Figure 4-figure supplement 2
Figure 4-figure supplement 2A			Pceh-36::miniSOG ASE/AWC ablation
time/min	Herm-cond			Male-cond
0	0	0	0	0	0	0
10	0	0	0	0	0	0
20	0	0	0	0	0	0
30	0	0	0	0	0	0
40	0	0	0	0	0	0
50	0	0	0	0	0	0
60	0	0	0	0.0384615	0	0.0689655
70	0.04	0.111111	0.0769231	0.153846	0.166667	0.275862
80	0.2	0.222222	0.230769	0.384615	0.4	0.482759
90	0.48	0.481481	0.423077	0.692308	0.633333	0.655172
100	0.68	0.740741	0.653846	0.807692	0.8	0.862069
110	0.96	0.888889	0.961538	0.923077	0.9	0.965517
120	1	0.962963	1	1	0.933333	1
Figure 4-figure supplement 2B			Podr-10::miniSOG AWA ablation
Time (min)	Herm-cond			Male-cond
0	0	0	0	0	0	0
10	0	0	0	0	0	0
20	0	0	0	0	0	0
30	0	0	0	0	0	0
40	0	0	0	0	0	0
50	0	0	0	0	0	0
60	0	0	0	0	0.0384615	0.0689655
70	0.0344828	0	0.12	0.2	0.0384615	0.275862
80	0.241379	0.105263	0.32	0.56	0.423077	0.448276
90	0.448276	0.315789	0.64	0.84	0.730769	0.724138
100	0.724138	0.684211	0.88	1	0.807692	0.896552
110	0.896552	0.736842	0.92	1	1	0.965517
120	0.896552	1	1	1	1	1
130	1	1	1	1	1	1
Figure 4-figure supplement 2C			Psrb-6::miniSOG ASH/ADF/ADL ablation
Time (min)	Herm-cond				Male-cond
0	0	0	0	0	0	0	0	0
10	0	0	0	0	0	0	0	0
20	0	0	0	0	0	0	0	0
30	0	0	0	0	0	0	0	0
40	0	0	0	0	0.0416667	0	0	0
50	0	0	0	0	0.166667	0.0869565	0.0384615	0
60	0	0.05	0	0	0.416667	0.304348	0.269231	0.25
70	0.111111	0.15	0.15385	0.05	0.541667	0.521739	0.5	0.357143
80	0.37037	0.35	0.38462	0.3	0.625	0.565217	0.692308	0.535714
90	0.666667	0.7	0.5	0.5	0.75	0.73913	0.730769	0.642857
100	0.851852	0.9	0.65385	0.8	0.916667	0.826087	0.884615	0.678571
110	0.925926	0.95	0.88462	1	0.916667	0.913044	0.961539	0.892857
120	1	1	1	1	1	1	1	1
Figure 4-figure supplement 2D			Pgpa-4::miniSOG ASI ablation
time/min	Herm-cond			Male-cond
0	0	0	0	0	0	0
10	0	0	0	0	0	0
20	0	0	0	0	0	0
30	0	0	0	0	0	0
40	0	0	0	0	0	0
50	0.037037	0	0	0	0	0
60	0.0740741	0	0.04	0.0833333	0.0740741	0
70	0.111111	0.0384615	0.12	0.25	0.185185	0
80	0.185185	0.192308	0.24	0.416667	0.333333	0.291667
90	0.555556	0.461538	0.48	0.625	0.666667	0.625
100	0.703704	0.692308	0.64	0.791667	0.925926	0.75
110	0.888889	0.846154	0.92	0.958333	1	0.833333
120	0.925926	0.923077	0.96	1	1	0.958333
Figure 4-figure supplement 2E			Pgcy-15::miniSOG ASG ablation
time/min	Herm-cond			Male-cond
0	0	0	0	0	0	0
10	0	0	0	0	0	0
20	0	0	0	0	0	0
30	0	0	0	0.0909091	0.0555556	0
40	0.047619	0.047619	0	0.136364	0.111111	0.05
50	0.142857	0.0952381	0	0.272727	0.388889	0.2
60	0.285714	0.190476	0.166667	0.454545	0.5	0.4
70	0.380952	0.428571	0.388889	0.545455	0.722222	0.65
80	0.571429	0.666667	0.5	0.727273	0.833333	0.75
90	0.761905	0.809524	0.611111	0.954545	0.833333	0.9
100	0.904762	0.857143	0.722222	1	0.944444	0.95
110	0.904762	0.952381	0.888889	1	0.944444	0.95
120	0.904762	0.952381	0.944444	1	0.944444	0.95
Figure 4-figure supplement 2F			Psra-7::miniSOG ASK ablation
time/min	Herm-cond			Male-cond
0	0	0	0	0	0	0
10	0	0	0	0	0	0
20	0	0	0	0	0	0
30	0	0	0	0	0	0
40	0	0	0	0	0	0
50	0	0	0	0	0	0
60	0	0.0434783	0.0526316	0.04	0.0384615	0.0869565
70	0	0.173913	0.0526316	0.12	0.115385	0.26087
80	0.181818	0.217391	0.0526316	0.24	0.461538	0.478261
90	0.318182	0.304348	0.368421	0.4	0.692308	0.73913
100	0.545455	0.434783	0.631579	0.72	0.730769	0.869565
110	0.772727	0.608696	0.736842	0.92	0.884615	0.956522
120	1	0.826087	0.894737	1	0.961538	0.956522
Figure 4-figure supplement 2G			Pdaf-28::miniSOG ASJ/ASI ablation
Time(min)	Herm-cond			Male-cond
0	0	0	0	0	0	0
15	0	0	0	0	0	0
30	0	0	0	0	0	0
45	0.0555556	0	0.05	0	0	0.043478
60	0.277778	0.0454545	0.15	0.130435	0.3	0.34783
75	0.388889	0.363636	0.45	0.521739	0.8	0.56522
90	0.666667	0.590909	0.65	0.826087	0.9	0.82609
105	0.833333	0.909091	1	0.956522	0.95	0.95652
120	0.833333	1	1	1	1	1
