# Supplementary material for: Male pheromones modulate synaptic transmission at the C. elegans neuromuscular junction in a sexually dimorphic manner
Source: eLife. 2021 Mar 31;10:e67170. doi: 10.7554/eLife.67170 (PMC8051947; doi:10.7554/eLife.67170)
Supplement: Figure 4—figure supplement 3—source data 1. [file elife-67170-fig4-figsupp3-data1.xlsx]

## Sheet: Figure 4-figure supplement 3
Figure 4-figure supplement 3A			hermaphrodites with ASJ/ASI optogenetically activated
Time(min)	no light			with light
0	0	0	0	0	0	0
15	0	0	0	0	0	0
30	0	13.6364	4	0	0	4
45	8	22.7273	16	3.44828	12.5	4
60	40	27.2727	32	34.4828	20.833	40
75	68	54.5455	52	89.6552	70.833	96
90	76	81.8182	68	100	91.667	96
105	92	95.4545	100	100	100	100
120	100	95.4545	100	100	100	100
Figure 4-figure supplement 3B			hermaphrodites with AWA optogenetically activated
time/min	no light			with light
0	0	0	0	0	0	0
10	0	0	0	0	0	0
20	0	0	0	0	0	0
30	0	0	0	0	0	0
40	0	0	0	0	0	0
50	0	0	0	0	0	0
60	0	3.7037	0	0	0	0
70	7.14286	7.40741	11.1111	3.84615	8.69565	14.2857
80	42.8571	48.1481	55.5556	46.1538	30.4348	35.7143
90	96.4286	88.8889	100	80.7692	82.6087	78.5714
100	100	100	100	100	91.3043	89.2857
110	100	100	100	100	95.6522	100
120	100	100	100	100	100	100
Figure 4-figure supplement 3C			hermaphrodites with AWC optogenetically activated
time/min	no light			with light
0	0	0	0	0	0	0
10	0	0	0	0	0	0
20	0	0	0	0	0	0
30	0	0	0	0	0	0
40	0	0	0	0	0	0
50	0	0	0	0	0	0
60	0	0	0	0	0	0
70	4	0	13.0435	0	13.0435	4.16667
80	40	34.7826	43.4783	32	43.4783	37.5
90	76	86.9565	86.9565	48	69.5652	83.3333
100	96	100	95.6522	92	86.9565	87.5
110	100	100	95.6522	100	95.6522	95.8333
120	100	100	100	100	100	100
