# Supplementary material for: Male pheromones modulate synaptic transmission at the C. elegans neuromuscular junction in a sexually dimorphic manner
Source: eLife. 2021 Mar 31;10:e67170. doi: 10.7554/eLife.67170 (PMC8051947; doi:10.7554/eLife.67170)
Supplement: Figure 4—source data 1. [file elife-67170-fig4-data1.xlsx]

## Sheet: Fig 4
Fig. 4 C
	light (-)Herm-cond	light (-) Male-cond	light (+) Herm-cond	light (+) Male-cond
Paralyzed % (70 min)	52.38	90	40.91	54.55
	55	69.23	50	23.08
	45.45	82.61	45.83	52.63
Fig. 4 D	Peristaltic Speed (um/s)
light (-) Herm-cond		327.53	315.4	309.9	250.92	324.51	237.2	280.13	286.29	240.37	260.42	260.28	222.08	395.55	208.41	243.41	300.13	265.53	254.11	204.31	276.51	284.27	264.9	313.94	243.08	308.18	275.92	287.12	217.83		236.06	172.4	305.13	314.21	153.55	364.4	121.99	275.31	261.95	310.58	338.97	295.93	217.06	307.6	277.68	273.36	309.42	291.54	243.9
light (-) Male-cond		160.37	255.25	231.74	145.84	188.71	204.58	242.86	250.85	194.99	211.87	176.01	248.84	209.59	191.1	292.7	204.53	218.55	257.53	243.3	168.57	169.87	234.8	155.94	328.56	224.8	307.79	299.6	239.72	303.03	275.55	251.02	291.27	225.45	167.52	293.07	302.25	162.72	227.95	197.8	314.69	137.4	253.94	257.85	250.75	274.63	217.1	241.95	156.49
light (+) Herm-cond		218.01	190.12	212.89	180.53	191.44	238.31	205.94	177.37	163.22	264.53	212.08	325.04	293.58	194.38	213.72	298.7	247.16	248.83	209.55	159	280.17	206.59	249.41	175.95	278.99	245.87	233.9	250.21	301.69	253.49	275.26	261.71	200.15	209.72	196.46	301.96	192.78	137.65	221.46	240.24	228.91	230.86	261.31	248.23	185.66	195.22	228.18	343.8
light (+) Male-cond		198.22	190.99	256.27	234.14	246.27	271.03	311.21	134.22	177.72	199.33	217.62	240.7	277.01	185.36	280.63	228.77	194.74	164.74	210.26	286.86	166.32	263.81	288.57	281.77	181.96	121.54	275.49	235.23	250.62	268.99	231.55	162.02	115.04	173.74	188.6	199.47	242.79	154.69	188.3	219.34	326.77	278.69	243.97	302.31	169.44	226.58	208.13	289.5
Fig. 4 E
	light(-)ATR(-)	light(+)ATR(-)	light(-)ATR(+)	light(+)ATR(+)
Paralyzed % (70 min)	84.615	89.4737	47.8261	92.8571
	73.91	74.0741	62.5	85
	64.2857	57.1429	53.5714	75
Fig. 4 G
	Herm excretome								Male excretome
0.1	-0.00126905	0.0711529	0.00713141	-0.0130966	0.0557602	0.0337775	0.204447	-0.175424	-0.0786703	0.0236633	0.110562	-0.131996	-0.175905	-0.0910534
0.2	0.0520591	0.0771611	0.0364237	-0.0149991	0.0795957	-0.0100587	0.221516	-0.201304	-0.0616857	0.0142677	0.100057	-0.215359	-0.182826	-0.147629
0.3	0.0463998	0.0670018	0.029473	-0.00744784	0.0951864	-0.0198758	0.236037	-0.167204	-0.0390713	-0.00572263	0.0814913	-0.16064	-0.197229	-0.203605
0.4	0.0443189	0.0529661	-0.0457535	-0.0476304	0.138793	-0.00748454	0.175756	-0.199045	-0.047069	-0.0216238	0.0707806	-0.133849	-0.210371	-0.218107
0.5	-0.0200907	0.051214	-0.069521	-0.0292776	0.131627	-0.0108951	0.133776	-0.215273	-0.0614874	-0.0273311	0.0673215	-0.0965366	-0.222227	-0.177391
0.6	-0.0121792	0.0252748	-0.106964	-0.00096084	0.111926	-0.043168	0.0670259	-0.233304	-0.0444424	-0.0268843	0.0660842	-0.0784941	-0.235638	-0.099195
0.7	-0.0155283	0.0213807	-0.0922391	-0.013477	0.136586	-0.0488083	0.0593685	-0.212683	-0.0416562	-0.0261851	0.0646212	-0.0799305	-0.249128	-0.0703129
0.8	-0.0223648	-0.00545044	-0.0866857	0.0067658	0.17457	-0.0308651	0.038229	-0.205854	-0.0630786	-0.0270754	0.0629318	-0.0618859	-0.259324	-0.0968467
0.9	-0.0337751	0.00364672	-0.106036	0.01705	0.198368	-0.0518303	0.051505	-0.20846	-0.0822494	-0.02761	0.062568	0.00948571	-0.264843	-0.0686602
1	-0.0368368	0.0196027	-0.0956137	0.0562333	0.202339	-0.0571292	0.0108658	-0.243018	-0.0937157	-0.0255318	0.062688	0.0573799	-0.267594	-0.0881127
1.1	-0.058936	0.00920006	-0.109036	0.0806974	0.226906	-0.034588	0.0397375	-0.247003	-0.0951011	-0.020859	0.0621192	0.0644583	-0.271358	-0.0322177
1.2	-0.0412249	0.0193635	-0.0978607	0.123883	0.226065	-0.0586872	-0.0205858	-0.321086	-0.0631145	-0.0155768	0.061873	0.0742859	-0.275724	-0.0730513
1.3	-0.0618012	-0.0181254	-0.106276	0.106512	0.247208	-0.0587845	0.0158471	-0.338987	-0.0367744	-0.0115296	0.0614714	0.14449	-0.274874	-0.0598451
1.4	-0.0280936	0.0147003	-0.100099	0.114725	0.245941	-0.0953604	0.00756353	-0.314364	-0.0586589	-0.00922719	0.0579436	0.189853	-0.267893	-0.0482363
1.5	-0.0273667	0.016211	-0.0814471	0.131403	0.199608	-0.0923559	-0.0119994	-0.37771	-0.0775761	-0.00841605	0.0497746	0.154479	-0.261979	-0.062414
1.6	-0.0368808	0.0806102	-0.0717379	0.131561	0.191748	-0.0954222	0.0255294	-0.337416	-0.0446235	-0.00854207	0.0391388	0.127833	-0.261314	-0.119259
1.7	-0.0655182	0.023831	-0.0739117	0.128318	0.193519	-0.131851	-0.00733857	-0.324683	-0.0454073	-0.00863184	0.0299082	0.0886965	-0.264415	-0.133385
1.8	-0.0477024	0.0473397	-0.0747895	0.121186	0.146387	-0.091546	0.0443136	-0.350411	-0.111456	-0.00806714	0.0249703	0.0846609	-0.271315	-0.131004
1.9	-0.0718215	0.0256801	-0.0588123	0.0902567	0.150691	-0.151938	0.102431	-0.311884	-0.0379146	-0.00742289	0.0242989	0.0728384	-0.280659	-0.0815941
2	-0.0764004	0.0238627	-0.0509123	0.0722988	0.142153	-0.139641	0.109052	-0.326565	-0.0709034	-0.00755174	0.0235732	0.0657115	-0.284187	-0.0873655
2.1	-0.0695777	0.038729	-0.0677638	0.0701583	0.121785	-0.131922	0.149734	-0.311467	-0.0607878	-0.00820279	0.0184396	-0.043916	-0.275508	-0.0160377
2.2	-0.0421673	0.0266334	-0.0434767	0.0543794	0.134358	-0.133544	0.157805	-0.328324	-0.0507641	-0.0083421	0.0100694	-0.108862	-0.263751	0.0276704
2.3	-0.0609033	0.000840515	-0.051915	0.0576517	0.137498	-0.123668	0.188352	-0.31751	-0.0516977	-0.00749318	0.000762629	-0.172829	-0.267778	0.0520623
2.4	-0.0589332	-0.021191	-0.0273528	0.0506063	0.168919	-0.132257	0.129876	-0.343631	-0.0423665	-0.00594605	-0.0111938	-0.243856	-0.291309	-0.000475582
2.5	-0.0755547	-0.02552	-0.00534442	0.0419619	0.178033	-0.16372	0.126107	-0.352882	-0.0745232	-0.00373386	-0.0269845	-0.241543	-0.317181	-0.021728
2.6	-0.0499656	-0.00786319	0.0108875	0.0250874	0.20196	-0.131226	0.108836	-0.329769	-0.0540312	-0.000586382	-0.0438552	-0.245129	-0.331099	0.0250793
2.7	-0.0441374	-0.0395555	0.00908019	0.00397285	0.157896	-0.131524	0.116254	-0.343717	-0.0568065	0.00264427	-0.0581733	-0.206016	-0.333817	0.0463352
2.8	-0.086139	-0.00908157	0.036792	-0.0057165	0.127733	-0.148622	0.129029	-0.301397	-0.0674086	0.00399834	-0.0679212	-0.204231	-0.330085	-0.0258722
2.9	-0.0486367	-0.0407165	0.0161226	-0.00359275	0.10817	-0.164206	0.148421	-0.352064	-0.0464873	0.0028026	-0.0728608	-0.129614	-0.32156	0.0849086
3	-0.0677786	-0.0216735	0.0532289	-0.0173393	0.127941	-0.146092	0.173077	-0.320968	-0.0185526	0.000716394	-0.0726638	-0.0955438	-0.309471	0.089929
3.1	-0.0486723	-0.0199053	0.0503204	-0.00740214	0.118645	-0.150457	0.16622	-0.342531	-0.0441103	-0.00027903	-0.0652329	-0.0524088	-0.29542	0.116051
3.2	-0.0717471	-0.0235621	0.0326645	-0.0253745	0.0763679	-0.141309	0.151439	-0.281741	-0.0827151	0.000354415	-0.0515166	0.00925154	-0.279405	0.0925571
3.3	-0.0638877	-0.0255755	-0.0129184	-0.0201155	0.0592191	-0.15939	0.112376	-0.317612	-0.0604955	0.00191217	-0.038777	0.0778803	-0.261477	0.0491361
3.4	-0.0807554	-0.00553159	0.00796746	-0.0129981	0.0598311	-0.149261	0.0920905	-0.310088	-0.057504	0.00298697	-0.0316559	0.0797448	-0.246161	0.0441929
3.5	-0.0756873	0.005949	0.0233617	-0.022025	0.0836152	-0.138967	0.0751603	-0.306606	-0.023202	0.00228592	-0.0269671	0.108235	-0.23932	0.0946294
3.6	-0.0756764	-0.00652626	0.0671536	-0.0184662	0.0864471	-0.147084	0.0791169	-0.303202	-0.0031164	0.000172272	-0.0225435	0.188759	-0.240525	0.0694094
3.7	-0.0814904	-0.0567732	0.0956133	-0.0154684	0.0776137	-0.167717	0.108885	-0.277097	-0.049869	-0.00120371	-0.021559	0.172252	-0.247024	0.0848499
3.8	-0.0991736	-0.00942764	0.0981884	-0.0328727	0.0870229	-0.171682	0.0939657	-0.288521	-0.045257	-0.000240456	-0.0260829	0.14819	-0.260358	0.118506
3.9	-0.0730263	-0.0722624	0.128482	-0.015478	0.0980309	-0.134139	0.124083	-0.280461	-0.11356	0.00210266	-0.0341836	0.225616	-0.278536	0.0830242
4	-0.0838426	-0.0616403	0.0728836	-0.0125717	0.0698377	-0.130443	0.0854258	-0.326184	-0.0663232	0.00340194	-0.0428139	0.240247	-0.291184	0.114785
4.1	-0.0783956	-0.0987257	0.0910228	-0.007419	0.0914512	-0.167475	0.126061	-0.315436	-0.0679743	0.00279645	-0.0499485	0.20815	-0.291862	0.117104
4.2	-0.0860197	-0.0422176	0.0801077	-0.0137468	0.0988465	-0.138401	0.0880518	-0.315227	-0.0191732	0.00211163	-0.056269	0.175893	-0.286654	0.175534
4.3	-0.0666041	-0.0224663	0.0792716	-0.02484	0.130835	-0.146003	0.102658	-0.344855	-0.0743516	0.00369208	-0.0631487	0.149499	-0.284514	0.16373
4.4	-0.0718603	-0.0209516	0.0795429	-0.0210548	0.173664	-0.136955	0.100502	-0.339176	-0.0467015	0.00806979	-0.0669211	0.0958988	-0.284002	0.0498134
4.5	-0.0623401	-0.0236392	0.0710381	-0.031664	0.170789	-0.144607	0.154645	-0.350706	-0.0662385	0.0141469	-0.0631456	0.0768829	-0.276583	0.133586
4.6	-0.0525409	-0.0275569	0.0313519	-0.0239514	0.143403	-0.143182	0.0910441	-0.359417	-0.0974248	0.0202556	-0.056147	0.0458067	-0.261398	0.140399
4.7	-0.0842736	-0.0344827	0.0734366	-0.0258488	0.146464	-0.102797	0.0798609	-0.361577	-0.0023595	0.0244758	-0.0528098	0.0426029	-0.24806	0.02823
4.8	-0.132216	-0.0783794	0.0661626	-0.0114447	0.135591	-0.101186	0.0425523	-0.326962	-0.0735788	0.0256879	-0.0506953	0.0444012	-0.246294	-0.0571103
4.9	-0.0748059	-0.0735815	0.0372567	-0.0303877	0.119687	-0.0949921	0.0551807	-0.382887	-0.0237857	0.0250215	-0.0431485	-0.0172505	-0.258507	0.0083468
5	-0.0653775	-0.0707812	0.0350748	-0.00634264	0.105794	-0.0809897	0.0348734	-0.351234	-0.025674	0.0248524	-0.0297476	-0.18484	-0.279294	0.0277735
5.1	-0.0574874	-0.0648145	0.0420586	-0.0200385	0.0869372	-0.0832961	-0.0308123	-0.351409	-0.0613332	0.0264881	-0.0133906	-0.318755	-0.299783	0.172866
5.2	-0.0803188	-0.068661	0.0753172	-0.0108091	0.0706873	-0.122859	-0.0123555	-0.378185	-0.060214	0.0301462	0.00457228	-0.327115	-0.314219	0.125956
5.3	-0.0359748	-0.0931743	0.0967059	-0.000438592	0.0603663	-0.11288	-0.00479058	-0.315154	-0.0405178	0.0361814	0.0210751	-0.333325	-0.322863	0.150719
5.4	-0.0581286	-0.0502885	0.110986	-0.00639307	0.0761026	-0.0959524	0.0530812	-0.335669	-0.0177416	0.0446097	0.0321247	-0.33424	-0.328755	0.0183877
5.5	-0.0508555	-0.0765362	0.116596	0.00852598	0.0651652	-0.127662	0.0477437	-0.298492	-0.049681	0.0543018	0.0383384	-0.328417	-0.332902	0.0719527
5.6	-0.0783544	-0.104097	0.0911093	-0.00483042	0.107628	-0.0927008	0.0239461	-0.291455	-0.0330127	0.0644488	0.0427813	-0.30541	-0.333817	0.0807495
5.7	-0.0616273	-0.0692898	0.0740396	-0.00886354	0.0924702	-0.116979	0.0288101	-0.275628	-0.095953	0.0765645	0.0456965	-0.300779	-0.330085	0.135139
5.8	-0.0790946	-0.0850344	0.0573362	-0.00225395	0.0939984	-0.115872	0.0580058	-0.27051	-0.0443217	0.0933727	0.04535	-0.307028	-0.32156	0.147594
5.9	-0.095888	-0.120273	0.0573664	-0.00837724	0.089966	-0.121144	0.0206011	-0.281046	-0.0398139	0.115615	0.0414914	-0.301357	-0.309471	0.188844
6	-0.0763063	-0.114118	0.0508551	-0.00633539	0.092573	-0.142257	-0.0189097	-0.25855	-0.0538539	0.141766	0.0373265	-0.297577	-0.29542	0.157724
6.1	-0.0673893	-0.133851	0.0435595	-1.23e-05	0.0814406	-0.123053	0.00122998	-0.237699	-0.0604449	0.171253	0.0371158	-0.329741	-0.279405	0.131396
6.2	-0.0672372	-0.117144	0.0216043	-0.00278133	0.0935682	-0.130384	0.013883	-0.263137	-0.0810931	0.2057	0.0407513	-0.289318	-0.260295	0.045625
6.3	-0.0987038	-0.121785	-0.00268103	-0.0100243	0.0626886	-0.152887	0.0137729	-0.226213	-0.0739819	0.245552	0.0441718	-0.248906	-0.238318	0.0264227
6.4	-0.10517	-0.152263	0.00990296	0.0185981	0.0675838	-0.141886	-0.00299717	-0.25301	-0.0736754	0.286783	0.0456053	-0.200006	-0.215854	0.0301733
6.5	-0.112742	-0.108181	-0.00102885	0.00107126	0.0643689	-0.139606	-0.0121954	-0.243202	-0.0124335	0.322363	0.0472304	-0.1428	-0.19643	0.145117
6.6	-0.0996187	-0.123571	-0.011864	-0.00108633	0.0403858	-0.166203	0.00893723	-0.26177	-0.0353223	0.346762	0.0491313	-0.151456	-0.182551	0.223192
6.7	-0.0749357	-0.124746	-0.00868087	-0.00163755	0.0522284	-0.178305	0.0458364	-0.283803	-0.0740423	0.358764	0.04684	-0.148217	-0.17358	0.150259
6.8	-0.085484	-0.12048	-0.0415095	0.00398497	0.0474597	-0.168807	0.0676097	-0.269016	-0.0296348	0.361042	0.0388588	-0.166004	-0.165675	0.139235
6.9	-0.097383	-0.134544	-0.0439096	0.016607	0.0473997	-0.15643	0.0975737	-0.221009	-0.0621373	0.358285	0.0295414	-0.158453	-0.154622	0.0748751
7	-0.0872192	-0.172147	-0.0388359	-0.00589466	0.0477916	-0.155971	0.134238	-0.202486	-0.0435775	0.355297	0.022423	-0.187758	-0.141991	0.0520587
7.1	-0.0748112	-0.164877	-0.0368472	0.0122533	0.0441206	-0.163028	0.164167	-0.19956	-0.0654859	0.35502	0.0199317	-0.226338	-0.136609	0.0426985
7.2	-0.0755134	-0.156555	-0.0609428	0.0146083	0.0407345	-0.180476	0.170789	-0.206054	-0.0646736	0.357096	0.0250951	-0.249314	-0.143226	0.0984866
7.3	-0.0446986	-0.185142	-0.058446	0.0062483	0.0387397	-0.175352	0.203717	-0.208137	-0.0492817	0.358619	0.0351185	-0.287321	-0.153012	0.089123
7.4	-0.0470503	-0.189333	-0.0644456	-0.0135228	0.0314367	-0.161973	0.217338	-0.233931	-0.038803	0.357045	0.0420681	-0.284704	-0.152331	0.188413
7.5	-0.0665544	-0.166529	-0.0425872	0.0178831	0.039842	-0.151853	0.215256	-0.251001	-0.0402486	0.352381	0.0403155	-0.315703	-0.137148	0.165236
7.6	-0.0249183	-0.171524	-0.0467262	0.0153019	0.0241765	-0.157753	0.211431	-0.272314	-0.0533638	0.346396	0.0276665	-0.3898	-0.114165	0.226213
7.7	-0.0692599	-0.195096	-0.0783373	0.0118682	0.0269782	-0.181222	0.212809	-0.289515	-0.0324995	0.340409	0.00773884	-0.356822	-0.0929633	0.21311
7.8	-0.0417335	-0.176172	-0.119891	0.0129061	-0.0005173	-0.16433	0.258329	-0.285203	-0.0334851	0.334944	-0.0108365	-0.336914	-0.0815337	0.247031
7.9	-0.0468514	-0.150187	-0.113057	0.0114058	0.0228024	-0.160377	0.233016	-0.233317	-0.0282914	0.331439	-0.0249107	-0.343318	-0.0832277	0.297832
8	-0.0366184	-0.141952	-0.128044	0.0141725	0.0276546	-0.156672	0.177859	-0.264761	-0.0828607	0.332764	-0.036588	-0.358543	-0.0931131	0.300501
8.1	-0.0454639	-0.151571	-0.128456	-0.000332458	0.0085322	-0.166118	0.133662	-0.237347	-0.000906211	0.341149	-0.0439622	-0.332925	-0.102159	0.299735
8.2	-0.0393571	-0.150017	-0.140642	0.00249183	-0.00468244	-0.142572	0.0760425	-0.238337	-0.0079702	0.356329	-0.0444488	-0.31105	-0.105532	0.303482
8.3	-0.0443391	-0.193233	-0.116125	0.00598085	0.0128816	-0.174214	0.0458008	-0.245997	-0.0387783	0.376428	-0.0397211	-0.297692	-0.103872	0.28845
8.4	-0.0620114	-0.211024	-0.111829	0.000866497	0.0279091	-0.165184	-0.0081318	-0.292891	-0.00510693	0.399932	-0.0313243	-0.255634	-0.0997331	0.328724
8.5	-0.062279	-0.166404	-0.160595	0.00219582	0.0255742	-0.150416	-0.0440455	-0.298947	-0.00303248	0.42591	-0.0205987	-0.235435	-0.0941965	0.361379
8.6	-0.0672482	-0.163908	-0.178158	0.00321424	0.0144977	-0.159974	-0.0645625	-0.312584	-0.0108841	0.452045	-0.0115955	-0.206171	-0.0869926	0.397619
8.7	-0.0869843	-0.185837	-0.18574	0.00648677	0.0170938	-0.1599	-0.131447	-0.317539	0.0547983	0.473006	-0.00736522	-0.138094	-0.0803226	0.437245
8.8	-0.0513641	-0.19259	-0.151147	0.0137005	0.0411521	-0.16843	-0.132593	-0.307232	0.0233553	0.482476	-0.00626306	-0.125481	-0.0780442	0.497568
8.9	-0.0486751	-0.14106	-0.163618	0.0224918	0.0528876	-0.182476	-0.166329	-0.329573	0.0268353	0.478247	-0.00531606	-0.14141	-0.0800409	0.558439
9	-0.0759691	-0.141812	-0.166371	-0.00345804	0.0466229	-0.159358	-0.180594	-0.335092	0.0344619	0.464979	-0.00553078	-0.145227	-0.0822231	0.569065
9.1	-0.0796614	-0.185544	-0.152476	0.0122631	0.0389944	-0.178815	-0.17404	-0.343496	0.0705855	0.45101	-0.00990232	-0.149268	-0.0821498	0.546881
9.2	-0.0678586	-0.172863	-0.174383	-0.010465	0.0294313	-0.155423	-0.175876	-0.33749	0.0682016	0.442845	-0.0155489	-0.1806	-0.0796639	0.621665
9.3	-0.0740402	-0.160558	-0.160813	-0.00476062	0.0230014	-0.156984	-0.195058	-0.323275	-0.00012212	0.443209	-0.0140604	-0.192409	-0.0731915	0.599405
9.4	-0.0725257	-0.189938	-0.171422	0.00934714	0.00869496	-0.157576	-0.197396	-0.357015	0.0555643	0.452323	-0.00301253	-0.206449	-0.0630557	0.577585
9.5	-0.0693153	-0.190148	-0.17648	0.00311798	0.0119741	-0.171631	-0.164795	-0.342568	0.0678477	0.46806	0.0119486	-0.18458	-0.0560466	0.512916
9.6	-0.0694726	-0.195749	-0.15238	0.000264585	0.0131214	-0.181077	-0.149979	-0.35704	0.0438369	0.485194	0.0292554	-0.237642	-0.0576788	0.479863
9.7	-0.0922765	-0.171046	-0.148389	0.00680439	0.0340201	-0.177163	-0.134753	-0.37141	0.0626383	0.497062	0.0521275	-0.237733	-0.0634996	0.424863
9.8	-0.0935391	-0.184798	-0.190224	0.00248459	0.0468539	-0.161384	-0.140659	-0.353447	0.0681638	0.498802	0.0773042	-0.308453	-0.0653457	0.421654
9.9	-0.0859231	-0.209225	-0.162635	0.00639986	0.0665093	-0.169316	-0.109785	-0.363365	0.0505281	0.489094	0.0958754	-0.357146	-0.0624157	0.416549
10	-0.130325	-0.219924	-0.216351	-0.0254203	0.0913357	-0.182258	-0.0967792	-0.344458	0.101415	0.470143	0.102322	-0.366539	-0.0610547	0.381336
10.1	-0.0855778	-0.181656	-0.210138	-0.000383022	0.125713	-0.188953	-0.104024	-0.350513	0.10939	0.446928	0.0967588	-0.363404	-0.0660528	0.432596
10.2	-0.105424	-0.214185	-0.180563	0.00487803	0.15415	-0.187245	-0.063121	-0.340207	0.136435	0.425671	0.0840954	-0.309795	-0.0764445	0.39427
10.3	-0.0825739	-0.165997	-0.200697	0.0135899	0.139349	-0.163399	-0.0398645	-0.307621	0.0696637	0.41141	0.0721256	-0.306377	-0.0883801	0.404785
10.4	-0.0779808	-0.175302	-0.181774	-0.00751289	0.148215	-0.158218	-0.0564174	-0.300964	0.0995548	0.405497	0.0644301	-0.221082	-0.0971002	0.427786
10.5	-0.108547	-0.213706	-0.159241	0.00602431	0.121305	-0.171366	-0.0474685	-0.294683	0.154216	0.404944	0.0592135	-0.169726	-0.0982451	0.302912
10.6	-0.0900242	-0.221091	-0.198209	-0.0125717	0.136541	-0.17296	-0.102536	-0.272535	0.150805	0.404934	0.058125	-0.10042	-0.0931482	0.273359
10.7	-0.113814	-0.186669	-0.175641	-0.0156563	0.175877	-0.17691	-0.118502	-0.271287	0.147114	0.402921	0.0647771	-0.0463233	-0.0900389	-0.0805818
10.8	-0.114403	-0.176724	-0.175229	-0.00141606	0.155182	-0.177572	-0.09395	-0.259331	0.0950367	0.400561	0.0750791	-0.0181352	-0.0946864	-0.12196
10.9	-0.0969379	-0.210678	-0.161609	-0.0174789	0.165991	-0.178217	-0.0929646	-0.256426	0.124396	0.401438	0.082496	0.028093	-0.10246	-0.148914
11	-0.107289	-0.187391	-0.189624	-0.0149701	0.167215	-0.183431	-0.0254533	-0.295943	0.198304	0.407328	0.0901285	0.0711591	-0.104707	-0.0608425
11.1	-0.100572	-0.21142	-0.155168	-0.0219819	0.184961	-0.179646	-0.00452719	-0.286635	0.149301	0.417829	0.105926	0.186144	-0.100765	0.0387346
11.2	-0.0934283	-0.205016	-0.196755	-0.00333518	0.196226	-0.197895	-0.0124623	-0.275636	0.153349	0.433529	0.129255	0.264671	-0.0980523	0.128624
11.3	-0.0871667	-0.231225	-0.132688	-0.0186636	0.204486	-0.156707	0.00949581	-0.321033	0.167238	0.457636	0.153022	0.280869	-0.102772	0.069067
11.4	-0.0609004	-0.251466	-0.148474	-0.0201831	0.221061	-0.178235	-0.0236318	-0.294483	0.158094	0.493444	0.174416	0.273837	-0.114124	0.0781803
11.5	-0.0597397	-0.281016	-0.166418	-0.00688674	0.219704	-0.172541	-0.00541347	-0.32837	0.159899	0.540402	0.196392	0.247531	-0.123951	0.122948
11.6	-0.0763782	-0.238109	-0.161441	-0.0233807	0.229443	-0.162215	-0.0811759	-0.332146	0.177114	0.592416	0.224289	0.222234	-0.122755	-0.0157063
11.7	-0.050864	-0.246227	-0.138566	-0.00896717	0.216112	-0.189598	-0.0613848	-0.338005	0.223409	0.640175	0.258163	0.274349	-0.109196	-0.109435
11.8	-0.0647941	-0.245052	-0.15456	-0.00858912	0.269449	-0.164612	-0.0193903	-0.327617	0.216348	0.676615	0.283939	0.371205	-0.0904895	-0.0581005
11.9	-0.0775911	-0.231212	-0.147922	-0.0196896	0.243295	-0.181672	-0.0990457	-0.301651	0.168905	0.700496	0.285171	0.373908	-0.0741366	-0.0651599
12	-0.0800564	-0.24813	-0.153091	-0.00999784	0.201153	-0.174547	-0.0623134	-0.301823	0.206936	0.71409	0.265002	0.347346	-0.0636358	-0.0818553
12.1	-0.0920658	-0.286554	-0.154177	-0.0307897	0.162705	-0.206852	-0.0659003	-0.315395	0.230905	0.718793	0.240713	0.369297	-0.0600846	-0.154203
12.2	-0.0931966	-0.258641	-0.142984	-0.012201	0.153887	-0.201339	-0.0875207	-0.334036	0.226902	0.714906	0.222932	0.347051	-0.0625843	-0.222972
12.3	-0.0910794	-0.283609	-0.150979	-0.0287815	0.132119	-0.167682	-0.0411312	-0.337322	0.224289	0.70482	0.215194	0.3167	-0.0672238	-0.275382
12.4	-0.0846657	-0.267511	-0.153152	-0.0208523	0.142102	-0.157759	-0.0181237	-0.35528	0.216481	0.694035	0.22058	0.238593	-0.0692751	-0.293398
12.5	-0.122789	-0.289465	-0.145402	-0.03137	0.0993024	-0.19293	0.00204511	-0.370235	0.211865	0.687656	0.237004	0.119325	-0.0659941	-0.0631466
12.6	-0.143299	-0.278265	-0.135127	-0.0234481	0.114679	-0.168038	-0.0590365	-0.358824	0.233523	0.686002	0.257308	0.133486	-0.0575795	0.27506
12.7	-0.113319	-0.294641	-0.134377	-0.0296919	0.121849	-0.177513	-0.070672	-0.374253	0.19234	0.684846	0.27748	0.0898725	-0.0479823	0.373496
12.8	-0.115088	-0.276685	-0.132415	-0.0230364	0.0939875	-0.192862	-0.0474507	-0.38035	0.246056	0.680296	0.300858	0.144642	-0.0426233	0.388395
12.9	-0.106704	-0.291022	-0.141984	-0.0221455	0.106342	-0.206602	-0.0841042	-0.34555	0.159504	0.671853	0.336093	0.183168	-0.0426328	0.383805
13	-0.130632	-0.268848	-0.152166	-0.0283939	0.124075	-0.178862	-0.0723053	-0.364908	0.171949	0.66045	0.386853	0.214531	-0.0414545	0.335312
13.1	-0.120548	-0.252006	-0.158536	-0.0239949	0.142187	-0.165685	-0.106891	-0.388332	0.250654	0.646323	0.441959	0.255	-0.0287858	0.312757
13.2	-0.103736	-0.231422	-0.127701	-0.0208163	0.139107	-0.188355	-0.0818805	-0.379351	0.208646	0.630622	0.484529	0.23886	-0.00133177	0.253594
13.3	-0.0947163	-0.292364	-0.158256	-0.0371923	0.0944758	-0.168733	-0.0572181	-0.35276	0.208726	0.616561	0.509651	0.243153	0.0309206	0.226409
13.4	-0.103755	-0.326713	-0.165432	-0.0359018	0.128005	-0.174833	-0.0423304	-0.361017	0.212586	0.606228	0.524255	0.284289	0.0533854	0.211244
13.5	-0.127471	-0.274395	-0.141526	-0.0385793	0.129812	-0.155066	-0.104468	-0.382723	0.239551	0.598151	0.534313	0.342093	0.0602491	0.172752
13.6	-0.107983	-0.285199	-0.156012	-0.0382685	0.120886	-0.173614	-0.136632	-0.375751	0.20131	0.590609	0.53894	0.379466	0.0551712	0.170577
13.7	-0.109652	-0.297724	-0.172804	-0.0179294	0.139491	-0.176786	-0.12316	-0.335002	0.247769	0.585469	0.534141	0.439783	0.0436913	0.154437
13.8	-0.113128	-0.267776	-0.15179	-0.0321117	0.1776	-0.169384	-0.108706	-0.302015	0.236161	0.586046	0.520561	0.417939	0.0303864	0.207309
13.9	-0.11393	-0.349638	-0.161029	-0.0286034	0.181232	-0.193348	-0.107429	-0.305857	0.268763	0.591997	0.504496	0.400525	0.0181846	0.227815
14	-0.133158	-0.324051	-0.140913	-0.0416036	0.233604	-0.173481	-0.105522	-0.306361	0.26799	0.598061	0.488104	0.35918	0.00734921	0.216209
14.1	-0.111841	-0.291911	-0.15683	-0.0402792	0.195595	-0.186081	-0.126918	-0.335129	0.259231	0.598227	0.467339	0.380365	-0.000932473	0.348504
14.2	-0.127482	-0.299737	-0.134224	-0.0380253	0.190167	-0.178311	-0.121954	-0.302776	0.257507	0.59159	0.442215	0.356144	-0.00258447	0.462071
14.3	-0.117083	-0.31349	-0.135033	-0.0468046	0.157461	-0.180088	-0.0967043	-0.304941	0.285037	0.584472	0.416643	0.358039	0.00344985	0.391218
14.4	-0.123234	-0.299557	-0.156362	-0.0232457	0.113587	-0.164527	-0.104721	-0.260424	0.279017	0.586031	0.390164	0.293876	0.0138704	0.540782
14.5	-0.090762	-0.294963	-0.165517	-0.0410087	0.102682	-0.179926	-0.137215	-0.270076	0.223962	0.600745	0.360382	0.297722	0.0278625	0.680052
14.6	-0.102352	-0.324944	-0.181577	-0.0419912	0.107579	-0.164827	-0.137742	-0.281086	0.258377	0.624474	0.328459	0.280134	0.0459389	0.655031
14.7	-0.091972	-0.340442	-0.163854	-0.0416348	0.0853641	-0.167148	-0.148296	-0.260698	0.262832	0.647643	0.297954	0.245267	0.0638345	0.638114
14.8	-0.100884	-0.366545	-0.153837	-0.0335276	0.0801842	-0.191062	-0.181359	-0.272097	0.26028	0.663063	0.270641	0.202629	0.0754123	0.586666
14.9	-0.112847	-0.321725	-0.158016	-0.0416373	0.0882964	-0.178748	-0.169802	-0.249761	0.216634	0.671107	0.246685	0.103398	0.0771948	0.581193
15	-0.116989	-0.303714	-0.185218	-0.0334047	0.0668066	-0.16868	-0.168272	-0.232052	0.258498	0.676802	0.230947	0.097988	0.068961	0.609707
15.1	-0.0994194	-0.301171	-0.186161	-0.0349602	0.0532494	-0.160963	-0.13603	-0.231132	0.250941	0.683373	0.230434	0.16182	0.0543574	0.682062
15.2	-0.103065	-0.307011	-0.194616	-0.037433	0.0464173	-0.185863	-0.149246	-0.25087	0.255423	0.691216	0.243772	0.174622	0.0387629	0.764442
15.3	-0.115	-0.302104	-0.190907	-0.0391403	0.0617939	-0.190879	-0.140766	-0.286782	0.22453	0.700668	0.261814	0.192133	0.0259498	0.799144
15.4	-0.130565	-0.319483	-0.161498	-0.0451721	0.0877892	-0.169894	-0.143143	-0.276884	0.19711	0.709963	0.274887	0.171352	0.0177068	0.79949
15.5	-0.11652	-0.302476	-0.163108	-0.0330891	0.0717274	-0.198216	-0.129359	-0.272969	0.165579	0.711631	0.278025	0.194119	0.0147458	0.767843
15.6	-0.105079	-0.344348	-0.137287	-0.0199304	0.0739644	-0.182747	-0.156508	-0.251811	0.205413	0.697724	0.274333	0.234312	0.0181898	0.750077
15.7	-0.130486	-0.344549	-0.192001	-0.0261763	0.0841675	-0.191198	-0.147943	-0.290207	0.237931	0.669631	0.269061	0.268736	0.0286568	0.690236
15.8	-0.126443	-0.365994	-0.16315	-0.011156	0.0896063	-0.169057	-0.195414	-0.288308	0.203875	0.638371	0.263161	0.306683	0.0415736	0.684977
15.9	-0.13011	-0.287474	-0.156111	-0.0211271	0.052954	-0.163894	-0.183156	-0.308709	0.189998	0.614828	0.25882	0.320193	0.0474339	0.620771
16	-0.114814	-0.355642	-0.14291	-0.0248665	0.0663745	-0.195036	-0.212679	-0.328955	0.18791	0.602186	0.262893	0.329928	0.0399507	0.566643
16.1	-0.123721	-0.310711	-0.177355	-0.0293136	0.0473398	-0.188361	-0.231289	-0.316847	0.191087	0.596632	0.281309	0.378196	0.0211454	0.572694
16.2	-0.130928	-0.286208	-0.186779	-0.0282206	0.0493389	-0.17693	-0.191721	-0.353235	0.20178	0.59237	0.314925	0.440326	-0.00196801	0.566242
16.3	-0.100484	-0.312353	-0.204633	-0.024091	0.0468817	-0.173649	-0.197204	-0.338766	0.169221	0.585977	0.358371	0.526587	-0.0228072	0.521411
16.4	-0.127344	-0.317061	-0.192299	-0.0296989	0.051379	-0.184647	-0.196941	-0.353189	0.188904	0.577564	0.401268	0.53496	-0.0381578	0.573791
16.5	-0.107044	-0.371922	-0.179642	-0.00160871	0.0560961	-0.17807	-0.192244	-0.391569	0.183202	0.568182	0.433484	0.543162	-0.047917	0.632788
16.6	-0.109014	-0.361797	-0.186786	-0.026246	0.0477637	-0.191183	-0.226859	-0.368623	0.155477	0.557019	0.449335	0.54122	-0.0530705	0.648501
16.7	-0.102877	-0.346679	-0.192378	-0.0149003	0.0389773	-0.174798	-0.217031	-0.39429	0.221107	0.542835	0.448627	0.483587	-0.0557416	0.742325
16.8	-0.125617	-0.355444	-0.181531	-0.0243005	0.0227958	-0.167623	-0.20911	-0.352449	0.119458	0.527256	0.437511	0.496965	-0.0605623	0.694329
16.9	-0.123315	-0.354904	-0.194633	-0.0139659	0.0254991	-0.174388	-0.189835	-0.350256	0.163786	0.514059	0.425298	0.518524	-0.071136	0.692735
17	-0.106568	-0.338852	-0.187101	-0.0145946	0.0243455	-0.180229	-0.167621	-0.35839	0.148734	0.505316	0.417688	0.497033	-0.0836956	0.727411
17.1	-0.107434	-0.396189	-0.19173	-0.0252853	0.0156191	-0.192173	-0.153644	-0.372428	0.115931	0.499432	0.416287	0.423921	-0.0887383	0.717297
17.2	-0.116807	-0.355264	-0.194354	-0.0298627	0.026456	-0.181584	-0.158693	-0.361037	0.14604	0.492131	0.420492	0.345026	-0.0798986	0.716358
17.3	-0.134059	-0.308564	-0.223057	-0.0215939	0.0388423	-0.170382	-0.126651	-0.347899	0.105746	0.479152	0.425481	0.178082	-0.060213	0.635037
17.4	-0.121618	-0.371756	-0.217029	-0.0131929	0.0282262	-0.160383	-0.113286	-0.325878	0.148309	0.459662	0.426246	0.157294	-0.0411842	0.506659
17.5	-0.128148	-0.389546	-0.215084	-0.0261426	0.0130979	-0.181289	-0.127174	-0.327965	0.15846	0.436888	0.425744	0.148621	-0.034082	0.547139
17.6	-0.14113	-0.36596	-0.143252	-0.011529	0.0277081	-0.178992	-0.097544	-0.349069	0.130877	0.413885	0.43148	0.181001	-0.0403288	0.541202
17.7	-0.121306	-0.377201	-0.188933	-0.0115027	0.0204371	-0.186291	-0.121047	-0.374282	0.155932	0.389677	0.443682	0.205542	-0.0508774	0.473029
17.8	-0.117934	-0.335296	-0.168052	-0.0153962	0.0232068	-0.152928	-0.107909	-0.363549	0.192969	0.361535	0.453286	0.18266	-0.055769	0.521278
17.9	-0.136676	-0.322961	-0.180834	-0.00485214	0.0201353	-0.170226	-0.0891855	-0.38544	0.161411	0.330459	0.453128	0.20935	-0.0548926	0.494314
18	-0.131826	-0.329129	-0.167369	-0.00484977	0.0473098	-0.169043	-0.0488918	-0.350677	0.141889	0.30256	0.444233	0.229771	-0.0558263	0.48855
18.1	-0.125478	-0.401837	-0.152275	0.00327204	0.0575388	-0.186538	-0.125893	-0.388087	0.154615	0.284798	0.429821	0.257957	-0.0612468	0.511028
18.2	-0.130372	-0.374569	-0.185823	0.000329635	0.0395467	-0.15408	-0.0976935	-0.329249	0.156263	0.28015	0.411641	0.29408	-0.0665187	0.545935
18.3	-0.144482	-0.374873	-0.167962	0.000384939	0.0275025	-0.178058	-0.0829621	-0.337105	0.149381	0.286718	0.390716	0.334734	-0.0697494	0.573835
18.4	-0.108144	-0.399159	-0.178829	6.5e-05	0.0209465	-0.181133	-0.0336339	-0.340186	0.123443	0.300888	0.364769	0.374952	-0.0760656	0.64089
18.5	-0.109011	-0.364496	-0.160686	-0.0106166	0.0239689	-0.165711	-0.0530512	-0.344343	0.209242	0.321409	0.330441	0.372567	-0.0901036	0.666371
18.6	-0.116279	-0.364245	-0.167018	0.018962	0.0222415	-0.169228	-0.040302	-0.350313	0.148413	0.350178	0.289821	0.388396	-0.1086	0.62578
18.7	-0.0998229	-0.357553	-0.204685	-0.00181571	0.00393049	-0.157906	-0.0112346	-0.30463	0.197184	0.388493	0.246733	0.434909	-0.123684	0.58035
18.8	-0.119653	-0.395051	-0.18546	0.00511176	0.00294791	-0.174208	0.0152711	-0.349094	0.199142	0.433286	0.202294	0.441798	-0.130973	0.517911
18.9	-0.109354	-0.357673	-0.156597	0.000726914	0.0212376	-0.181713	0.0227396	-0.374638	0.167884	0.477663	0.162282	0.482415	-0.129847	0.552079
19	-0.120366	-0.328522	-0.141783	-0.00362158	0.00582687	-0.183593	0.0182669	-0.383512	0.208873	0.513759	0.137083	0.441734	-0.119439	0.615136
19.1	-0.121944	-0.365798	-0.141919	-0.0021698	-0.0018914	-0.178585	0.00886608	-0.357768	0.228098	0.534755	0.129118	0.397211	-0.100786	0.607046
19.2	-0.0931934	-0.339405	-0.140255	0.00731017	0.000895219	-0.170503	-0.0492509	-0.357388	0.184545	0.537294	0.131097	0.443197	-0.079709	0.487906
19.3	-0.0984605	-0.363733	-0.162447	-0.00988222	0.0392065	-0.160583	-0.0864316	-0.328717	0.264541	0.524327	0.13556	0.406719	-0.062151	0.512732
19.4	-0.126233	-0.402472	-0.16014	-0.00756819	0.0396428	-0.161779	-0.115866	-0.356234	0.217744	0.504263	0.139226	0.297109	-0.0493109	0.43567
19.5	-0.117116	-0.413416	-0.152901	-0.00843255	0.0604691	-0.169045	-0.171535	-0.338905	0.271772	0.486121	0.140832	0.217799	-0.0403141	0.570581
19.6	-0.1011	-0.412896	-0.165367	-0.00391313	0.0402959	-0.166288	-0.160379	-0.335755	0.257992	0.475561	0.13799	0.241551	-0.0368635	0.524271
19.7	-0.105579	-0.4046	-0.164421	-0.0233831	0.0336519	-0.194464	-0.19518	-0.317154	0.266001	0.473238	0.127604	0.176526	-0.0420905	0.503181
19.8	-0.121975	-0.389522	-0.168848	0.0117792	0.028391	-0.171425	-0.199425	-0.351692	0.246214	0.474722	0.108948	0.0648224	-0.0566252	0.575219
19.9	-0.131873	-0.402478	-0.16576	-0.0044068	0.0550303	-0.164969	-0.212914	-0.335661	0.262424	0.474834	0.0839684	0.103231	-0.0788556	0.538011
20	-0.0948514	-0.428848	-0.165875	0.010308	0.0684998	-0.172347	-0.194162	-0.349785	0.257948	0.475397	0.0578134	0.130766	-0.10559	0.429983
20.1	-0.117448	-0.42228	-0.143452	-0.00833379	0.0557089	-0.183207	-0.197443	-0.358574	0.244819	0.486379	0.0393909	0.165805	-0.130609	0.425427
20.2	-0.109451	-0.369648	-0.15785	0.00851163	0.0388361	-0.171145	-0.120477	-0.316565	0.281908	0.515738	0.0337057	0.139148	-0.147991	0.427937
20.3	-0.124232	-0.415297	-0.181061	-0.00724795	0.0791183	-0.167311	-0.158412	-0.344094	0.299969	0.558656	0.0340941	0.147352	-0.155191	0.402183
20.4	-0.0941609	-0.377478	-0.17103	-0.00858688	0.0642832	-0.171289	-0.133244	-0.333996	0.279099	0.599035	0.0300101	0.159161	-0.150298	0.42585
20.5	-0.125288	-0.39002	-0.16879	0.00944828	0.0586112	-0.180385	-0.0899757	-0.359315	0.299832	0.621839	0.0207231	0.0886965	-0.133119	0.427819
20.6	-0.108782	-0.467824	-0.195031	0.0214564	0.0553021	-0.172412	-0.0826279	-0.339548	0.279853	0.62375	0.014236	0.175438	-0.108857	0.45796
20.7	-0.119659	-0.434874	-0.163505	0.00509964	0.0416871	-0.169593	-0.0882284	-0.297928	0.287199	0.613317	0.0159112	0.228994	-0.0855168	0.460639
20.8	-0.111529	-0.377432	-0.16313	0.0066095	0.00692473	-0.144819	-0.0635982	-0.326058	0.247043	0.602684	0.0230913	0.205372	-0.0690504	0.388469
20.9	-0.0987588	-0.367538	-0.168532	0.00554749	0.0278194	-0.15901	-0.0954982	-0.315702	0.313963	0.599033	0.0280889	0.178883	-0.0614373	0.382907
21	-0.105833	-0.401865	-0.185435	0.00142535	0.0149856	-0.150625	-0.0946581	-0.337138	0.294182	0.601862	0.0270681	0.203973	-0.0616423	0.365034
21.1	-0.110431	-0.418758	-0.172333	0.00398246	0.0397885	-0.161143	-0.0813503	-0.339135	0.278514	0.606158	0.0262141	0.246664	-0.0665793	0.371435
21.2	-0.110426	-0.446281	-0.150488	-0.0120539	0.0451629	-0.178927	-0.0440421	-0.306275	0.295854	0.607136	0.032413	0.287045	-0.0706632	0.397129
21.3	-0.111426	-0.36148	-0.188163	0.000852143	0.0458822	-0.173024	-0.0114128	-0.314241	0.260178	0.603149	0.0408457	0.325094	-0.0693584	0.415021
21.4	-0.0930111	-0.404054	-0.190114	0.0160676	0.046593	-0.168615	0.0279563	-0.310043	0.304817	0.596219	0.0422975	0.367112	-0.0646134	0.384935
21.5	-0.102498	-0.420138	-0.177405	0.0127062	0.0566271	-0.16316	0.00427942	-0.346704	0.317271	0.589978	0.0362254	0.401807	-0.0618589	0.357452
21.6	-0.0749826	-0.445296	-0.20162	0.0167032	0.0442811	-0.171581	-0.0178066	-0.341213	0.27383	0.585322	0.0248947	0.426516	-0.0624697	0.315727
21.7	-0.0748557	-0.387714	-0.185806	0.00162037	0.0357944	-0.165782	-0.0536135	-0.346659	0.298121	0.577745	0.0065059	0.461087	-0.0626901	0.350506
21.8	-0.104598	-0.438622	-0.171242	0.00819625	0.0323955	-0.149688	-0.0920325	-0.370256	0.346407	0.560599	-0.0156377	0.409199	-0.0585974	0.354783
21.9	-0.0810453	-0.408132	-0.168647	0.00906311	0.0335856	-0.167814	-0.0975369	-0.366573	0.32981	0.531406	-0.0339899	0.329079	-0.0508215	0.355328
22	-0.0786277	-0.382835	-0.182054	0.00281472	0.0218927	-0.16845	-0.0916552	-0.354601	0.300681	0.493794	-0.0500082	0.292089	-0.0438991	0.34927
22.1	-0.0825545	-0.40506	-0.163382	-0.00525179	0.0114454	-0.150625	-0.0906978	-0.353934	0.32341	0.453695	-0.0693128	0.278566	-0.042058	0.291306
22.2	-0.0993503	-0.415922	-0.198349	0.00495506	0.00400534	-0.156837	-0.0890754	-0.340407	0.281509	0.415269	-0.0908103	0.222006	-0.0476652	0.293695
22.3	-0.0880314	-0.452549	-0.197883	0.00165645	0.0145404	-0.188762	-0.106105	-0.35472	0.30988	0.379938	-0.111827	0.202914	-0.0588633	0.247168
22.4	-0.102948	-0.366824	-0.190505	-0.0143055	0.00519112	-0.176544	-0.107842	-0.36983	0.342504	0.347423	-0.13068	0.235003	-0.0665815	0.200799
22.5	-0.0959543	-0.390879	-0.175717	-0.0103083	0.0242172	-0.16233	-0.0616444	-0.381868	0.313143	0.317361	-0.142117	0.186319	-0.0624605	0.201211
22.6	-0.10989	-0.429	-0.20422	-0.0120781	0.0190395	-0.159514	-0.0378683	-0.348104	0.307419	0.290442	-0.140617	0.202124	-0.0503699	0.32981
22.7	-0.0692069	-0.393024	-0.184092	-0.0100653	0.0240695	-0.155249	0.00504803	-0.353013	0.270983	0.268086	-0.123352	0.233324	-0.0416078	0.412312
22.8	-0.0913502	-0.449282	-0.200594	-0.0106985	0.00555929	-0.154086	-0.0153516	-0.349466	0.303204	0.251386	-0.0891141	0.273559	-0.0396684	0.356219
22.9	-0.07873	-0.427934	-0.178897	-0.0174622	0.00537299	-0.182691	0.031198	-0.318992	0.285345	0.240481	-0.0445937	0.277414	-0.037856	0.326589
23	-0.0917646	-0.432989	-0.138361	-0.0179005	0.0088726	-0.158922	0.00934291	-0.338083	0.305306	0.234113	-0.00627464	0.217609	-0.0317195	0.258563
23.1	-0.0683422	-0.433165	-0.175273	-0.00268507	0.0442985	-0.175033	-0.0210448	-0.3206	0.285017	0.229173	0.01495	0.225475	-0.0252988	0.262167
23.2	-0.091005	-0.442688	-0.171718	0.0150201	0.0538851	-0.175752	-0.0404193	-0.350788	0.27318	0.221339	0.0231277	0.29024	-0.0247121	0.236994
23.3	-0.0872524	-0.450529	-0.189632	-0.006032	0.0436199	-0.17169	-0.0358542	-0.367068	0.296057	0.207296	0.0269806	0.306544	-0.0328157	0.227539
23.4	-0.0916571	-0.445813	-0.155475	0.00310599	0.0262186	-0.163973	-0.0727038	-0.356909	0.20715	0.186959	0.0319345	0.298656	-0.0496028	0.205105
23.5	-0.0855669	-0.452608	-0.188371	-0.0152422	0.0208459	-0.165979	-0.124957	-0.30882	0.307361	0.163353	0.0409559	0.294285	-0.0736176	0.224112
23.6	-0.0834112	-0.405476	-0.172593	-0.0190202	0.00519756	-0.160451	-0.156558	-0.380714	0.261856	0.140214	0.0550363	0.302969	-0.102187	0.227288
23.7	-0.0866302	-0.440985	-0.221925	-0.00294264	-0.00269211	-0.182556	-0.228574	-0.34314	0.239672	0.120058	0.0767423	0.307597	-0.130158	0.24949
23.8	-0.0942102	-0.444792	-0.184385	-0.0087071	-0.00141197	-0.187466	-0.228887	-0.400354	0.207784	0.104364	0.10958	0.295251	-0.15028	0.247366
23.9	-0.104173	-0.483185	-0.203954	-0.0166003	0.0109253	-0.167101	-0.276578	-0.37812	0.258644	0.0943401	0.146408	0.289971	-0.156873	0.307211
24	-0.0927487	-0.424173	-0.189749	-0.00677837	0.00771478	-0.166368	-0.249525	-0.389196	0.229547	0.0905429	0.170822	0.299673	-0.149398	0.348721
24.1	-0.103855	-0.41127	-0.18309	-0.00174355	-0.00271344	-0.157216	-0.28551	-0.362625	0.23183	0.0923075	0.177309	0.309165	-0.134016	0.343929
24.2	-0.0938265	-0.421987	-0.189362	0.0127327	0.0073786	-0.175231	-0.29184	-0.393836	0.241317	0.098065	0.175077	0.35621	-0.1208	0.429619
24.3	-0.0928813	-0.461432	-0.180893	0.0129372	0.0205892	-0.153376	-0.308222	-0.359278	0.226391	0.105515	0.171029	0.375446	-0.115379	0.432361
24.4	-0.106472	-0.471722	-0.200931	0.0207316	0.0274106	-0.150704	-0.308119	-0.338427	0.20743	0.11135	0.164418	0.332572	-0.11542	0.354187
24.5	-0.134484	-0.456725	-0.180536	0.0198553	0.0318264	-0.184568	-0.302707	-0.367764	0.206935	0.112232	0.155929	0.266946	-0.117357	0.285156
24.6	-0.112419	-0.410774	-0.202058	-0.00359038	0.0466056	-0.172771	-0.293651	-0.395546	0.203261	0.106926	0.150944	0.205983	-0.120824	0.269329
24.7	-0.0922154	-0.439775	-0.180643	0.030185	0.0696449	-0.161803	-0.286663	-0.363603	0.229754	0.0970272	0.15179	0.122712	-0.126105	0.341768
24.8	-0.104991	-0.416535	-0.188291	-0.00154603	0.075362	-0.153773	-0.297675	-0.354666	0.222224	0.0853393	0.150761	0.0716468	-0.132497	0.351346
24.9	-0.0927766	-0.464646	-0.18854	0.0120728	0.104336	-0.16954	-0.311755	-0.369008	0.233999	0.0740848	0.139176	0.0738246	-0.139212	0.302087
25	-0.0698708	-0.450258	-0.178484	0.00178879	0.0754733	-0.151859	-0.320502	-0.345853	0.234647	0.0647807	0.119358	0.0858724	-0.14599	0.303938
25.1	-0.0271734	-0.452509	-0.181266	0.0107436	0.0797541	-0.161075	-0.341122	-0.389118	0.204193	0.0589904	0.0985805	0.0819095	-0.151993	0.249199
25.2	0.0247263	-0.441596	-0.181529	-0.000840613	0.0848012	-0.132334	-0.294754	-0.370481	0.216289	0.0585859	0.0812282	0.0934009	-0.154723	0.213931
25.3	0.0723535	-0.429139	-0.20397	0.0165322	0.0913164	-0.115795	-0.316666	-0.377772	0.227374	0.0654612	0.0691395	0.105667	-0.15218	0.226247
25.4	0.110295	-0.476411	-0.186468	0.0163638	0.0831871	-0.0692876	-0.337553	-0.364274	0.237393	0.0806433	0.059452	0.119929	-0.146861	0.220405
25.5	0.143571	-0.505172	-0.172349	0.0154415	0.070608	-0.0557153	-0.300067	-0.382011	0.219794	0.102658	0.048694	0.121285	-0.145603	0.257915
25.6	0.148952	-0.480102	-0.189667	0.00217883	0.0582323	-0.0401666	-0.314499	-0.363819	0.255472	0.12726	0.0401778	0.137045	-0.151822	0.294626
25.7	0.175514	-0.433537	-0.195081	-0.00796561	0.0493989	-0.0165653	-0.294687	-0.302306	0.160013	0.15063	0.0368398	0.188168	-0.159188	0.326309
25.8	0.209379	-0.481626	-0.205295	-0.0015725	0.0343497	-0.0126774	-0.259527	-0.324994	0.226888	0.172694	0.0337246	0.225597	-0.156582	0.361073
25.9	0.212786	-0.436051	-0.210052	0.00167568	0.0542533	-0.0126565	-0.275533	-0.324061	0.197717	0.195305	0.0255241	0.22403	-0.137074	0.380235
26	0.222862	-0.499916	-0.184682	0.00654906	0.0588681	-0.00471283	-0.273846	-0.312085	0.201626	0.217441	0.0132913	0.242776	-0.102351	0.482079
26.1	0.28797	-0.457882	-0.20157	-0.0151024	0.0582816	-0.0137286	-0.291463	-0.274135	0.174816	0.234491	7.34977e-05	0.222512	-0.0626745	0.467073
26.2	0.243894	-0.519493	-0.212605	0.012215	0.0336371	-0.0346675	-0.27824	-0.275649	0.221586	0.242257	-0.0134978	0.204889	-0.0324237	0.389661
26.3	0.251985	-0.494398	-0.219791	0.0117141	0.0725708	-0.0364023	-0.317851	-0.270469	0.233382	0.240064	-0.0275628	0.185955	-0.0224874	0.439306
26.4	0.210189	-0.482823	-0.199766	0.0151261	0.0619888	-0.0789017	-0.292623	-0.276958	0.194723	0.230588	-0.0402351	0.182521	-0.0330288	0.351504
26.5	0.215337	-0.459324	-0.199475	0.0521063	0.0786303	-0.089543	-0.295551	-0.338042	0.142035	0.218117	-0.0472818	0.153089	-0.0540489	0.288145
26.6	0.171775	-0.4521	-0.160901	0.054731	0.0606594	-0.109884	-0.311435	-0.298468	0.177436	0.206564	-0.047817	0.131492	-0.0754923	0.202157
26.7	0.177788	-0.47277	-0.146885	0.0198045	0.07835	-0.162722	-0.323615	-0.325505	0.206541	0.198416	-0.0493262	0.180303	-0.0939168	0.202617
26.8	0.199663	-0.478377	-0.148462	0.0321956	0.0819971	-0.152775	-0.299088	-0.324536	0.181901	0.195537	-0.0593387	0.232242	-0.109503	0.170657
26.9	0.185515	-0.485752	-0.164964	0.0690169	0.0798054	-0.169334	-0.316072	-0.292269	0.168201	0.200161	-0.076363	0.221834	-0.122782	0.147852
27	0.175439	-0.466206	-0.166626	0.0364022	0.110291	-0.170524	-0.306137	-0.313729	0.161271	0.214229	-0.0929967	0.196669	-0.136315	0.0882067
27.1	0.196322	-0.475314	-0.154122	0.0545768	0.12622	-0.163694	-0.308091	-0.317379	0.168453	0.238141	-0.101466	0.171939	-0.154375	0.101302
27.2	0.171507	-0.484506	-0.167097	0.0228721	0.07143	-0.168439	-0.273949	-0.328361	0.181514	0.270135	-0.100045	0.0771303	-0.176552	0.0791301
27.3	0.145697	-0.492411	-0.164942	0.039448	0.0915584	-0.139747	-0.289513	-0.348824	0.14898	0.305999	-0.0972243	-0.00785954	-0.196385	0.0280642
27.4	0.168975	-0.45239	-0.154976	0.0256462	0.128367	-0.152027	-0.290402	-0.34864	0.198285	0.340091	-0.102141	-0.000741482	-0.210371	0.0123624
27.5	0.148098	-0.474194	-0.14884	0.0400716	0.15033	-0.147939	-0.287705	-0.341479	0.164812	0.368511	-0.113117	-0.00432262	-0.222227	0.0983334
27.6	0.152613	-0.486804	-0.188107	0.0363058	0.142048	-0.152904	-0.290996	-0.359253	0.103597	0.391076	-0.12204	0.011284	-0.235638	0.0775955
27.7	0.147894	-0.473917	-0.154585	0.0341242	0.177724	-0.133924	-0.293519	-0.355874	0.147063	0.409215	-0.125502	0.00446146	-0.249128	-0.0775894
27.8	0.119583	-0.502159	-0.154613	0.0233659	0.193732	-0.140749	-0.292363	-0.337645	0.137937	0.422946	-0.126817	0.0248252	-0.259324	-0.0516371
27.9	0.141195	-0.503626	-0.161213	0.0220463	0.172042	-0.148395	-0.316054	-0.325956	0.136782	0.430856	-0.131007	0.0515986	-0.264843	-0.0358986
28	0.157795	-0.497895	-0.18572	0.0169729	0.155505	-0.117377	-0.279877	-0.332846	0.178327	0.431763	-0.140063	0.033353	-0.267594	0.0587981
28.1	0.142958	-0.490987	-0.159147	0.00689827	0.136941	-0.138926	-0.281009	-0.337289	0.181508	0.426045	-0.150776	0.0450521	-0.271358	0.0965397
28.2	0.180563	-0.482346	-0.1525	0.0275123	0.135571	-0.145023	-0.280852	-0.340014	0.13593	0.416675	-0.158876	0.0283557	-0.275724	0.0946624
28.3	0.142624	-0.447693	-0.171487	0.0249911	0.15409	-0.100103	-0.305183	-0.320714	0.141589	0.408516	-0.166326	0.0645309	-0.274874	0.144992
28.4	0.137835	-0.480434	-0.153449	0.0273748	0.195047	-0.114235	-0.274429	-0.311132	0.197349	0.404836	-0.179852	0.0675538	-0.267893	0.125643
28.5	0.128757	-0.497038	-0.157152	0.0104788	0.203553	-0.11201	-0.289193	-0.307044	0.180701	0.405213	-0.200729	0.0727393	-0.261979	0.112399
28.6	0.132289	-0.508556	-0.155688	-0.000549205	0.239353	-0.118726	-0.309411	-0.283673	0.195342	0.408051	-0.221217	0.0639906	-0.261314	0.118418
28.7	0.136567	-0.448657	-0.177991	0.0139582	0.256964	-0.0737529	-0.294352	-0.275064	0.172942	0.413367	-0.235043	0.114349	-0.264415	0.0753904
28.8	0.123819	-0.488542	-0.171686	0.0063277	0.236862	-0.108096	-0.272038	-0.259969	0.191426	0.421374	-0.245993	0.116604	-0.271315	0.0687689
28.9	0.0837577	-0.529164	-0.184286	0.00562452	0.254849	-0.0997988	-0.285905	-0.241034	0.188571	0.429832	-0.259609	0.150125	-0.280659	0.0886594
29	0.0790073	-0.52716	-0.183556	0.011572	0.282964	-0.097151	-0.307646	-0.212089	0.19315	0.434807	-0.273479	0.132412	-0.284187	0.100312
29.1	0.0802097	-0.525739	-0.158066	-0.0140934	0.291317	-0.120308	-0.286979	-0.215035	0.208166	0.433943	-0.282278	0.116399	-0.273221	0.106562
29.2	0.0767251	-0.510449	-0.174092	-0.00649434	0.310311	-0.122355	-0.289278	-0.265923	0.16598	0.428474	-0.284448	0.112335	-0.247532	0.103791
29.3	0.0776428	-0.531763	-0.182232	-0.00513855	0.38667	-0.110072	-0.295491	-0.252846	0.180149	0.422687	-0.281783	0.170496	-0.216147	0.0626812
29.4	0.0772584	-0.562796	-0.190793	-0.0095018	0.37319	-0.1105	-0.307906	-0.243787	0.225629	0.421649	-0.27829	0.16744	-0.191267	0.0807312
29.5	0.0642896	-0.514782	-0.182625	-0.00536741	0.377779	-0.131471	-0.282016	-0.226492	0.191638	0.427571	-0.277918	0.167486	-0.178611	0.117729
29.6	0.0495165	-0.50572	-0.181294	0.0123956	0.32548	-0.136181	-0.305767	-0.27197	0.228611	0.436996	-0.281353	0.168166	-0.174279	0.116478
29.7	0.0381645	-0.500217	-0.227941	0.015627	0.265733	-0.135108	-0.287061	-0.258468	0.253985	0.44314	-0.286352	0.0770903	-0.173503	0.0796012
29.8	0.0691645	-0.514422	-0.189824	0.0348561	0.235132	-0.138628	-0.283087	-0.224597	0.250154	0.441972	-0.29206	0.0550849	-0.176023	0.0561553
29.9	0.074111	-0.48539	-0.177335	0.0473001	0.264939	-0.130543	-0.305706	-0.168464	0.279792	0.434249	-0.300666	0.0803912	-0.181032	0.0785411
30	0.0735223	-0.513914	-0.22113	0.0472784	0.313511	-0.144666	-0.288332	-0.217396	0.28061	0.42161	-0.311025	0.0144965	-0.18561	0.121097
30.1	0.085803	-0.487878	-0.203521	0.0924502	0.260965	-0.137939	-0.31567	-0.17499	0.225135	0.403515	-0.317119	0.00929558	-0.188274	0.129449
30.2	0.116645	-0.495415	-0.192132	0.104372	0.222987	-0.165982	-0.280439	-0.192053	0.210607	0.378875	-0.317662	-0.0607185	-0.18817	0.118075
30.3	0.0892075	-0.49349	-0.205381	0.111475	0.180783	-0.125901	-0.324697	-0.172478	0.242687	0.349122	-0.317442	-0.0950451	-0.183855	0.141131
30.4	0.13521	-0.512619	-0.203511	0.0992165	0.215751	-0.157408	-0.303988	-0.191983	0.215164	0.319089	-0.317036	-0.0515858	-0.177127	0.0424594
30.5	0.1232	-0.493686	-0.22084	0.10605	0.175631	-0.147532	-0.31261	-0.21492	0.199605	0.294853	-0.312816	-0.0503833	-0.174396	0.0966351
30.6	0.107465	-0.486958	-0.2634	0.109265	0.197876	-0.15729	-0.298341	-0.209417	0.275442	0.279805	-0.308242	-0.000796754	-0.180307	0.166112
30.7	0.0857864	-0.507969	-0.316664	0.119289	0.159807	-0.142272	-0.335176	-0.211504	0.178538	0.272486	-0.31118	0.0061846	-0.190979	0.179116
30.8	0.117331	-0.485801	-0.306762	0.123914	0.180398	-0.12057	-0.32538	-0.19612	0.21599	0.268927	-0.320339	-0.001869	-0.195857	0.202388
30.9	0.130661	-0.465216	-0.280491	0.124882	0.161145	-0.124034	-0.338357	-0.167625	0.21221	0.266291	-0.329971	0.0342204	-0.188448	0.219121
31	0.105097	-0.476045	-0.282637	0.113074	0.156622	-0.12153	-0.320694	-0.181541	0.181968	0.262536	-0.339175	0.0582911	-0.175818	0.225779
31.1	0.100358	-0.424305	-0.283863	0.104181	0.193231	-0.138092	-0.351156	-0.193092	0.19021	0.254007	-0.344901	0.137837	-0.173936	0.230697
31.2	0.106907	-0.453745	-0.27075	0.0998763	0.0999188	-0.130826	-0.342214	-0.153967	0.21098	0.236681	-0.34292	0.138482	-0.192643	0.186433
31.3	0.161639	-0.420937	-0.264567	0.1333	0.352252	-0.113427	-0.298796	-0.113272	0.203953	0.209902	-0.337345	0.156851	-0.228279	0.118981
31.4	0.21707	-0.389971	-0.251277	0.112667	0.359551	-0.135904	-0.319544	-0.0996997	0.188192	0.176926	-0.334885	0.11416	-0.269256	0.0930429
31.5	0.188469	-0.368859	-0.243104	0.0841962	0.331255	-0.146967	-0.321943	-0.0731376	0.224188	0.142102	-0.33626	0.119738	-0.306171	0.0498135
31.6	0.216409	-0.387188	-0.26938	0.0696911	0.23483	-0.141747	-0.332095	-0.0922819	0.188601	0.108922	-0.338858	0.120726	-0.337268	0.0444728
31.7	0.165596	-0.3608	-0.254124	0.0396406	0.216769	-0.154999	-0.305329	-0.113563	0.195211	0.0802373	-0.34143	0.131231	-0.363342	0.0636454
31.8	0.158364	-0.369357	-0.227645	0.0137561	0.295123	-0.143329	-0.299035	-0.109179	0.203313	0.0582937	-0.343843	0.160708	-0.381756	0.00752612
31.9	0.129694	-0.372508	-0.233459	0.0154511	0.263276	-0.172821	-0.325562	-0.143828	0.22866	0.0433367	-0.345367	0.145273	-0.391493	0.0192342
32	0.163742	-0.450432	-0.250206	0.000426026	0.316405	-0.160595	-0.317008	-0.158982	0.189411	0.0329737	-0.347346	0.17091	-0.396726	-0.0676076
32.1	0.188615	-0.411256	-0.242139	-0.00737568	0.312706	-0.161243	-0.306415	-0.116951	0.152724	0.024059	-0.353904	0.0733017	-0.399444	-0.133683
32.2	0.202775	-0.412772	-0.236256	-0.00951615	0.261622	-0.173619	-0.310991	-0.140573	0.198965	0.0150808	-0.366604	0.00290561	-0.398184	-0.14672
32.3	0.209454	-0.373194	-0.269868	-0.0354346	0.249766	-0.17531	-0.309379	-0.109024	0.174244	0.00644954	-0.382799	-0.079582	-0.39581	-0.153297
32.4	0.166209	-0.404107	-0.262815	-0.0217627	0.240982	-0.143965	-0.308471	-0.10571	0.167283	-0.000883684	-0.397622	-0.144892	-0.396728	-0.186589
32.5	0.153241	-0.455163	-0.294016	-0.0141515	0.247595	-0.163979	-0.327238	-0.107779	0.144874	-0.00660287	-0.406816	-0.205458	-0.398531	-0.22181
32.6	0.128257	-0.432572	-0.246328	0.0121188	0.235995	-0.164188	-0.326007	-0.0732486	0.127973	-0.011276	-0.411225	-0.225372	-0.396749	-0.23195
32.7	0.114387	-0.370121	-0.213535	0.00777962	0.234224	-0.149199	-0.294502	-0.0334597	0.155309	-0.0162176	-0.413199	-0.214293	-0.39312	-0.237128
32.8	0.094836	-0.361484	-0.254219	0.00242678	0.198649	-0.153664	-0.291897	-0.0553747	0.214475	-0.0230016	-0.409776	-0.206905	-0.39264	-0.227073
32.9	0.0980255	-0.447494	-0.26329	-0.0103542	0.217709	-0.155005	-0.292299	-0.063438	0.145376	-0.0318778	-0.398892	-0.25168	-0.396292	-0.235281
33	0.131689	-0.432208	-0.276624	0.0155498	0.183523	-0.1765	-0.308386	-0.0573456	0.136089	-0.040456	-0.38668	-0.234271	-0.399707	-0.240886
33.1	0.0777945	-0.397763	-0.293278	0.0374398	0.176902	-0.151208	-0.260904	-0.139066	0.145389	-0.0454966	-0.380933	-0.187727	-0.398424	-0.229679
33.2	0.102541	-0.446125	-0.334694	0.0527566	0.167628	-0.164483	-0.273732	-0.133233	0.136437	-0.0464805	-0.382741	-0.186193	-0.393534	-0.2843
33.3	0.0806823	-0.438766	-0.26048	0.0849618	0.165107	-0.14952	-0.280447	-0.14297	0.138008	-0.0461499	-0.387989	-0.132315	-0.389965	-0.284742
33.4	0.0846423	-0.394624	-0.297982	0.0940347	0.139161	-0.157367	-0.299437	-0.130968	0.138408	-0.04724	-0.392662	-0.141726	-0.389552	-0.261358
33.5	0.0896385	-0.389111	-0.242712	0.0899534	0.112851	-0.178544	-0.278329	-0.138885	0.15956	-0.0497123	-0.393211	-0.168367	-0.389439	-0.2612
33.6	0.0928522	-0.485704	-0.300861	0.140454	0.107676	-0.157924	-0.282852	-0.121858	0.115609	-0.0514312	-0.388212	-0.172533	-0.386762	-0.268642
33.7	0.0960938	-0.463117	-0.286583	0.159816	0.116481	-0.15547	-0.297672	-0.161152	0.131168	-0.0508238	-0.384178	-0.186363	-0.381709	-0.29069
33.8	0.0901798	-0.4363	-0.292342	0.173926	0.109812	-0.161346	-0.270658	-0.164912	0.12714	-0.0484726	-0.387705	-0.183543	-0.377209	-0.271609
33.9	0.0906719	-0.381105	-0.25539	0.195108	0.109225	-0.178403	-0.262844	-0.192338	0.149795	-0.0461363	-0.39126	-0.119903	-0.376376	-0.301617
34	0.0888647	-0.44609	-0.270109	0.224272	0.110169	-0.166751	-0.310048	-0.149161	0.162315	-0.0445857	-0.38441	-0.0562042	-0.378742	-0.284598
34.1	0.0557175	-0.381204	-0.279788	0.203996	0.124777	-0.166391	-0.232531	-0.162587	0.128476	-0.0431746	-0.373189	-0.0589139	-0.380407	-0.290413
34.2	0.0858224	-0.443821	-0.235698	0.193519	0.15577	-0.148866	-0.265509	-0.143099	0.130879	-0.0415411	-0.368889	-0.0783154	-0.378683	-0.274841
34.3	0.0681586	-0.422448	-0.253436	0.164314	0.149383	-0.184264	-0.268857	-0.120502	0.069274	-0.0405557	-0.369779	-0.0547832	-0.37546	-0.267317
34.4	0.0758991	-0.444745	-0.238365	0.115217	0.159983	-0.16008	-0.250834	-0.175613	0.14909	-0.0410008	-0.370972	-0.0857357	-0.37573	-0.291426
34.5	0.0732652	-0.451022	-0.274966	0.100603	0.153487	-0.157387	-0.265527	-0.169994	0.128326	-0.0420469	-0.373362	-0.100149	-0.381507	-0.31362
34.6	0.0931453	-0.46836	-0.266115	0.0778322	0.172446	-0.156969	-0.218686	-0.187396	0.107718	-0.0418564	-0.372537	-0.126234	-0.388132	-0.308151
34.7	0.0996721	-0.442819	-0.30532	0.060021	0.175329	-0.193636	-0.243771	-0.1717	0.112114	-0.0397203	-0.363207	-0.157985	-0.389948	-0.267523
34.8	0.113931	-0.50098	-0.248294	0.0393372	0.162164	-0.156948	-0.20284	-0.208745	0.140717	-0.0369851	-0.353083	-0.17334	-0.387763	-0.280016
34.9	0.0914263	-0.445286	-0.263868	0.0110831	0.161992	-0.153971	-0.16307	-0.182233	0.13335	-0.0355816	-0.350041	-0.190984	-0.386426	-0.350997
35	0.108554	-0.532941	-0.201339	0.00873549	0.161196	-0.162872	-0.159205	-0.264389	0.128344	-0.0360185	-0.348468	-0.248286	-0.386927	-0.35834
35.1	0.0705544	-0.463586	-0.211416	-0.00276434	0.164679	-0.168972	-0.165187	-0.265612	0.124436	-0.0368932	-0.341762	-0.315145	-0.386537	-0.371723
35.2	0.106498	-0.480906	-0.253941	0.00122072	0.153452	-0.171245	-0.149018	-0.268271	0.129583	-0.0362404	-0.332213	-0.353861	-0.38505	-0.373269
35.3	0.0687056	-0.460293	-0.197091	0.0181022	0.19467	-0.166512	-0.199528	-0.28123	0.126129	-0.0337407	-0.323721	-0.283469	-0.384018	-0.383778
35.4	0.0422737	-0.458869	-0.196598	-0.0096822	0.21096	-0.177183	-0.214558	-0.274483	0.163796	-0.0313977	-0.316893	-0.316317	-0.382188	-0.331413
35.5	0.0413118	-0.522891	-0.205021	-0.00205405	0.223567	-0.170698	-0.210011	-0.256721	0.119452	-0.0310268	-0.312858	-0.331976	-0.377728	-0.372161
35.6	0.0632122	-0.413296	-0.211286	-0.00925358	0.225513	-0.151287	-0.214024	-0.25585	0.120399	-0.0313988	-0.314005	-0.343594	-0.372429	-0.367053
35.7	0.0428485	-0.441122	-0.219861	-0.0236072	0.213989	-0.170589	-0.195336	-0.25616	0.149707	-0.0294618	-0.319323	-0.391753	-0.369954	-0.326396
35.8	0.0256024	-0.480078	-0.225534	-0.00666526	0.194498	-0.184556	-0.176826	-0.238292	0.106122	-0.0244287	-0.32459	-0.365284	-0.37168	-0.24926
35.9	0.0599014	-0.443346	-0.199545	-0.0155912	0.164593	-0.165782	-0.178829	-0.261463	0.0956966	-0.0188835	-0.325767	-0.32114	-0.375984	-0.38429
36	0.0569004	-0.451034	-0.211418	-0.0315964	0.191913	-0.16531	-0.167265	-0.227474	0.128111	-0.0153535	-0.320456	-0.307341	-0.379795	-0.381425
36.1	0.111309	-0.440263	-0.221132	-0.0272694	0.127113	-0.153859	-0.169603	-0.263251	0.117127	-0.0136545	-0.313003	-0.320937	-0.381214	-0.374891
36.2	0.0982074	-0.471166	-0.196891	-0.0210548	0.115317	-0.147956	-0.169418	-0.280976	0.0921199	-0.0125724	-0.314114	-0.329428	-0.381648	-0.362643
36.3	0.145138	-0.461915	-0.193377	-0.0130919	0.13396	-0.160783	-0.166913	-0.260722	0.10482	-0.0123407	-0.32681	-0.337908	-0.382287	-0.380583
36.4	0.136401	-0.476126	-0.206287	-0.0435756	0.118226	-0.155476	-0.139524	-0.278149	0.114966	-0.0139387	-0.341261	-0.342541	-0.380938	-0.399451
36.5	0.166262	-0.43014	-0.196117	-0.0279196	0.139077	-0.17526	-0.182999	-0.294409	0.106914	-0.0167281	-0.349685	-0.347404	-0.376376	-0.392206
36.6	0.171899	-0.4962	-0.169196	-0.0297136	0.176885	-0.171039	-0.217661	-0.308537	0.0782444	-0.0179833	-0.355574	-0.390175	-0.371079	-0.389396
36.7	0.153605	-0.441123	-0.188636	-0.0385623	0.175721	-0.172721	-0.204331	-0.303824	0.0612153	-0.015235	-0.362098	-0.424382	-0.36828	-0.372452
36.8	0.11892	-0.459136	-0.194388	-0.028134	0.172799	-0.177661	-0.245123	-0.331663	0.130275	-0.00878705	-0.363395	-0.348452	-0.369813	-0.39901
36.9	0.124156	-0.527833	-0.213203	-0.0357379	0.151059	-0.177684	-0.262057	-0.313185	0.101362	-0.00101459	-0.356078	-0.280675	-0.375507	-0.387686
37	0.0978124	-0.526686	-0.18269	-0.0227764	0.156475	-0.15813	-0.24702	-0.316524	0.127429	0.00638662	-0.347835	-0.242907	-0.38278	-0.377301
37.1	0.0635768	-0.505699	-0.177906	-0.0293283	0.141322	-0.164639	-0.237932	-0.325583	0.072115	0.0129326	-0.346585	-0.279797	-0.38825	-0.388698
37.2	0.0700099	-0.463436	-0.179249	-0.0399591	0.186346	-0.173001	-0.2207	-0.30337	0.0698752	0.0179566	-0.351293	-0.311096	-0.391068	-0.383656
37.3	0.0376449	-0.505159	-0.194534	-0.0406887	0.168645	-0.174456	-0.222671	-0.308181	0.147423	0.0207573	-0.356964	-0.324501	-0.39248	-0.382978
37.4	0.0304328	-0.521101	-0.188946	-0.0506186	0.200717	-0.184783	-0.203143	-0.300702	0.112753	0.0216065	-0.360496	-0.332515	-0.391575	-0.365856
37.5	0.0327951	-0.468315	-0.166518	-0.0407776	0.211046	-0.164456	-0.165279	-0.314319	0.0838889	0.0212759	-0.361487	-0.337208	-0.386807	-0.365116
37.6	0.0506194	-0.585344	-0.196378	-0.0419455	0.196342	-0.183987	-0.181032	-0.341062	0.0886396	0.0203746	-0.362574	-0.299907	-0.381092	-0.372157
37.7	0.03345	-0.473055	-0.177921	-0.0347579	0.195344	-0.164132	-0.175164	-0.308492	0.107525	0.0196086	-0.367243	-0.272807	-0.378765	-0.373357
37.8	0.0264506	-0.523957	-0.167437	-0.0228728	0.206033	-0.174191	-0.218518	-0.357052	0.102591	0.0193154	-0.374468	-0.300576	-0.379417	-0.382885
37.9	0.0256077	-0.480926	-0.168868	-0.0333083	0.197596	-0.170712	-0.22161	-0.33404	0.0720018	0.0186883	-0.379679	-0.252176	-0.380047	-0.391839
38	0.0557284	-0.520284	-0.169947	-0.0277364	0.220556	-0.178845	-0.217778	-0.358038	0.100065	0.0169589	-0.379918	-0.244544	-0.380645	-0.362603
38.1	0.0108095	-0.515324	-0.19373	-0.0312135	0.176843	-0.170212	-0.251454	-0.369625	0.0733858	0.0150607	-0.372985	-0.191804	-0.383341	-0.397586
38.2	0.0665803	-0.516034	-0.200211	-0.0390415	0.249158	-0.172704	-0.237505	-0.381143	0.107186	0.014681	-0.358831	-0.18426	-0.387233	-0.380795
38.3	0.0425914	-0.510012	-0.172138	-0.0190103	0.229685	-0.162256	-0.253211	-0.331176	0.0791448	0.0160426	-0.344173	-0.218126	-0.387373	-0.376581
38.4	0.0324414	-0.499147	-0.17067	-0.0166626	0.209858	-0.175083	-0.266861	-0.316974	0.119996	0.0177442	-0.33668	-0.219172	-0.380632	-0.370245
38.5	0.0252814	-0.482164	-0.187347	-0.00871184	0.221155	-0.162607	-0.278756	-0.339331	0.13106	0.0183851	-0.336884	-0.241384	-0.37082	-0.362682
38.6	0.0635077	-0.479912	-0.188736	-0.0135902	0.236527	-0.176409	-0.266398	-0.326115	0.0829962	0.0176244	-0.339053	-0.238606	-0.365177	-0.228825
38.7	0.0761033	-0.499012	-0.205568	-0.00792689	0.230849	-0.18508	-0.255336	-0.316172	0.0568544	0.0160941	-0.33664	-0.228825	-0.367241	-0.210538
38.8	0.0932779	-0.520229	-0.166878	-0.00364818	0.18793	-0.165084	-0.283827	-0.328067	0.12797	0.014849	-0.328694	-0.210538	-0.374248	-0.267372
38.9	0.116913	-0.48362	-0.173764	-0.024156	0.195834	-0.178568	-0.276429	-0.364008	0.120785	0.0146448	-0.319268	-0.267372	-0.380066	-0.256035
39	0.0838822	-0.528278	-0.18503	-0.0135229	0.181656	-0.147729	-0.305803	-0.338079	0.0927646	0.0152192	-0.310762	-0.256035	-0.3806	-0.271563
39.1	0.0638089	-0.537601	-0.179189	-0.0120517	0.182861	-0.160948	-0.301067	-0.3349	0.10939	0.0150927	-0.304946	-0.271563	-0.37666	-0.197764
39.2	0.0660195	-0.494479	-0.198674	-0.0491497	0.156635	-0.178954	-0.287289	-0.320968	0.125784	0.0124008	-0.305307	-0.197764	-0.372827	-0.188025
39.3	0.0915229	-0.493746	-0.196873	-0.030113	0.173048	-0.179378	-0.297348	-0.34616	0.122062	0.00674982	-0.312145	-0.188025	-0.3736	-0.206032
39.4	0.0621727	-0.510214	-0.19347	-0.0349242	0.186665	-0.172898	-0.254087	-0.340825	0.116052	0.000816855	-0.320953	-0.206032	-0.378731	-0.230482
39.5	0.0829843	-0.543358	-0.196946	-0.0374571	0.207127	-0.188894	-0.270974	-0.333574	0.137024	-0.000794463	-0.327618	-0.230482	-0.383672	-0.264299
39.6	0.0560522	-0.473732	-0.19035	-0.0409776	0.187975	-0.179799	-0.258136	-0.370337	0.0509681	0.00438771	-0.333711	-0.264299	-0.385229	-0.305203
39.7	0.0522907	-0.535137	-0.182662	-0.0402817	0.183966	-0.186123	-0.261662	-0.326925	0.0505399	0.0144203	-0.344231	-0.305203	-0.384463	-0.272412
39.8	0.00647954	-0.487346	-0.188043	-0.028353	0.224826	-0.176529	-0.270843	-0.335816	0.117482	0.0250929	-0.358942	-0.272412	-0.384439	-0.275521
39.9	0.0453495	-0.468773	-0.21391	-0.0339851	0.225541	-0.176653	-0.28146	-0.271234	0.0716894	0.0316097	-0.37278	-0.275521	-0.386712	-0.262112
40	0.0536257	-0.471358	-0.197729	-0.0263255	0.186012	-0.169098	-0.264612	-0.231742	0.0923265	0.0285785	-0.384004	-0.262112	-0.390938	-0.255541
40.1	0.058144	-0.515033	-0.211371	-0.037226	0.176324	-0.178688	-0.258748	-0.250076	0.118461	0.0156815	-0.393912	-0.255541	-0.396712	-0.240981
40.2	0.083277	-0.563368	-0.200248	-0.0395112	0.175216	-0.189604	-0.229745	-0.290186	0.128566	0.00465031	-0.402028	-0.240981	-0.402062	-0.240118
40.3	0.121255	-0.531068	-0.219525	-0.0378834	0.15266	-0.169864	-0.249838	-0.307993	0.135765	0.0105896	-0.405028	-0.240118	-0.403289	-0.210034
40.4	0.106597	-0.55837	-0.21289	-0.038028	0.139396	-0.17344	-0.21918	-0.310538	0.101525	0.0330618	-0.398563	-0.210034	-0.40181	-0.276307
40.5	0.142138	-0.523749	-0.241811	-0.0559691	0.124279	-0.185009	-0.203228	-0.288959	0.0766867	0.0538834	-0.383775	-0.199271	-0.403572	-0.280925
40.6	0.140474	-0.542581	-0.230529	-0.0265809	0.0996255	-0.197233	-0.180374	-0.296553	0.142596	0.0556922	-0.37125	-0.216279	-0.407007	-0.279574
40.7	0.141436	-0.516236	-0.295447	-0.0404575	0.111791	-0.178895	-0.157366	-0.312437	0.0707782	0.0384254	-0.370923	-0.210846	-0.404215	-0.286911
40.8	0.149795	-0.56162	-0.258624	-0.0333156	0.110445	-0.150106	-0.144759	-0.271721	0.102646	0.0182891	-0.379995	-0.246881	-0.396179	-0.272158
40.9	0.156659	-0.60377	-0.220109	-0.0443629	0.14799	-0.172123	-0.133753	-0.298595	0.0859953	0.0118469	-0.387232	-0.275552	-0.392151	-0.262105
41	0.137006	-0.53077	-0.211766	-0.0278112	0.188437	-0.179746	-0.101512	-0.250268	0.100049	0.0205583	-0.386302	-0.323034	-0.395668	-0.253483
41.1	0.0976357	-0.560971	-0.235302	-0.0316686	0.200387	-0.158077	-0.13925	-0.293513	0.0807779	0.0329401	-0.382015	-0.274691	-0.40233	-0.238295
41.2	0.0982907	-0.52016	-0.219276	-0.0426221	0.265397	-0.182473	-0.126779	-0.295685	0.139382	0.0399473	-0.383533	-0.253202	-0.407121	-0.20251
41.3	0.0984868	-0.528934	-0.232405	-0.0445605	0.332141	-0.173955	-0.138795	-0.289233	0.112882	0.041869	-0.390836	-0.242911	-0.407914	-0.212168
41.4	0.0776538	-0.519778	-0.259239	-0.020188	0.56815	-0.159423	-0.182427	-0.304405	0.103643	0.0419993	-0.394847	-0.196215	-0.404617	-0.211965
41.5	0.0444871	-0.512395	-0.251514	-0.0233711	0.660036	-0.168863	-0.155359	-0.324294	0.0629965	0.0414121	-0.391832	-0.186679	-0.398443	-0.323034
41.6	0.0319748	-0.483746	-0.249097	-0.0258585	0.626562	-0.188868	-0.165194	-0.353844	0.114895	0.0403747	-0.386582	-0.16062	-0.392209	-0.274691
41.7	0.0291585	-0.476906	-0.276387	-0.0284374	0.574481	-0.174329	-0.1742	-0.314957	0.105089	0.0396968	-0.382647	-0.150587	-0.388071	-0.253202
41.8	0.0265472	-0.447907	-0.279788	-0.0358368	0.562536	-0.178367	-0.210939	-0.303955	0.0708921	0.0395644	-0.379203	-0.198175	-0.384855	-0.242911
41.9	0.0298774	-0.509452	-0.267444	-0.0454128	0.594239	-0.194164	-0.218013	-0.314847	0.136045	0.0391765	-0.375954	-0.234335	-0.380882	-0.196215
42	0.0378855	-0.459198	-0.314131	-0.0134603	0.599201	-0.188641	-0.23294	-0.293415	0.0595341	0.0379107	-0.374718	-0.243728	-0.37698	-0.186679
42.1	0.0328315	-0.484033	-0.318067	-0.0338647	0.633377	-0.175007	-0.267295	-0.310346	0.100612	0.0361388	-0.37698	-0.286745	-0.374249	-0.16062
42.2	0.00750725	-0.503499	-0.324575	-0.0247485	0.584268	-0.171048	-0.257922	-0.31348	0.0889348	0.0349357	-0.382537	-0.347087	-0.37302	-0.150587
42.3	0.010522	-0.476275	-0.309492	-0.0295617	0.554418	-0.154413	-0.281823	-0.253529	0.105756	0.035069	-0.389498	-0.313296	-0.374232	-0.198175
42.4	-0.013599	-0.489252	-0.265463	-0.00671819	0.565325	-0.151674	-0.297704	-0.246508	0.124031	0.0361627	-0.396039	-0.298645	-0.378072	-0.234335
42.5	-0.0025931	-0.523958	-0.317343	-0.0167325	0.565986	-0.162468	-0.298416	-0.276557	0.0843343	0.036966	-0.402433	-0.287449	-0.382875	-0.243728
42.6	0.0126033	-0.46393	-0.311626	-0.0146788	0.543975	-0.177348	-0.317032	-0.284626	0.0632653	0.0364781	-0.409883	-0.298996	-0.38716	-0.199721
42.7	-0.0121404	-0.492733	-0.285347	-0.0160535	0.51052	-0.163529	-0.325804	-0.292285	0.122372	0.0347221	-0.418158	-0.276307	-0.391	-0.229544
42.8	-0.031017	-0.467162	-0.250373	-0.02745	0.509531	-0.161655	-0.282375	-0.287355	0.112199	0.0323946	-0.425071	-0.280925	-0.394677	-0.201506
42.9	0.016795	-0.488799	-0.184322	-0.0136096	0.455734	-0.186503	-0.295174	-0.310935	0.10814	0.0297071	-0.428553	-0.279574	-0.396508	-0.188808
43	0.0152449	-0.4485	-0.159327	-0.0176402	0.547652	-0.154339	-0.29447	-0.305084	0.132186	0.0257397	-0.429409	-0.286911	-0.392928	-0.196047
43.1	0.0572651	-0.444664	-0.141335	-0.0407176	0.584156	-0.167216	-0.298597	-0.313055	0.0815034	0.0194649	-0.429438	-0.272158	-0.381604	-0.209708
43.2	0.0518791	-0.442209	-0.136972	-0.0280329	0.495766	-0.183996	-0.292157	-0.325509	0.0620627	0.0116249	-0.428493	-0.262105	-0.364331	-0.27955
43.3	0.0370122	-0.409746	-0.159454	-0.0419263	0.420632	-0.1726	-0.316987	-0.32821	0.0885706	0.00489648	-0.426875	-0.253483	-0.345878	-0.314415
43.4	0.023477	-0.523585	-0.180596	-0.0307344	0.199961	-0.184302	-0.289321	-0.321066	0.0592151	0.00143317	-0.425879	-0.238295	-0.328669	-0.329331
43.5	-0.0328517	-0.430294	-0.228962	-0.0496218	0.281544	-0.170857	-0.299487	-0.326688	0.132428	0.000688024	-0.424267	-0.20251	-0.309837	-0.353099
43.6	-0.00857293	-0.415147	-0.212534	-0.0470671	0.20818	-0.169802	-0.305795	-0.318284	0.0974251	0.000333686	-0.419407	-0.212168	-0.287469	-0.130543
43.7	0.0051559	-0.404024	-0.23297	-0.0402985	0.140706	-0.150165	-0.30181	-0.325518	0.103584	-0.00137829	-0.412028	-0.211965	-0.268792	-0.172875
43.8	-0.0324292	-0.392087	-0.225486	-0.0290369	0.273242	-0.17896	-0.293758	-0.314581	0.0616931	-0.00473581	-0.406644	-0.199721	-0.264179	-0.152087
43.9	-0.0183082	-0.499685	-0.202135	-0.0187022	0.238186	-0.1786	-0.29469	-0.289589	0.112301	-0.00902982	-0.405788	-0.229544	-0.271066	-0.167766
44	0.00227373	-0.478941	-0.2304	-0.0406237	0.216947	-0.180624	-0.306941	-0.308038	0.057594	-0.0130324	-0.406809	-0.201506	-0.273439	-0.138287
44.1	0.0301369	-0.514602	-0.226639	-0.0367709	0.171057	-0.172748	-0.291203	-0.297244	0.105928	-0.0153068	-0.406217	-0.188808	-0.261441	-0.103299
44.2	0.072381	-0.516412	-0.253556	-0.0196533	0.170383	-0.165234	-0.290128	-0.28461	0.0823008	-0.015032	-0.402479	-0.196047	-0.243388	-0.149679
44.3	0.0644473	-0.505879	-0.24679	-0.0384179	0.191232	-0.161664	-0.277891	-0.274278	0.099269	-0.0133198	-0.394962	-0.209708	-0.233933	-0.101529
44.4	0.097586	-0.505714	-0.211914	-0.0508811	0.148135	-0.137924	-0.265174	-0.275845	0.114327	-0.0127494	-0.384352	-0.27955	-0.235693	-0.10476
44.5	0.0829924	-0.491604	-0.238625	-0.0224513	0.138103	-0.163803	-0.214697	-0.283398	0.0782487	-0.0145128	-0.37276	-0.314415	-0.238755	-0.141747
44.6	0.0519705	-0.470399	-0.225787	-0.0397759	0.129996	-0.166442	-0.248561	-0.295923	0.116268	-0.017474	-0.360489	-0.329331	-0.23682	-0.142163
44.7	0.0406682	-0.499625	-0.243433	-0.0349073	0.112885	-0.173004	-0.253144	-0.31454	0.0978355	-0.0206555	-0.342479	-0.353099	-0.235193	-0.16187
44.8	0.0702116	-0.474271	-0.21527	-0.0303998	0.100051	-0.181069	-0.283695	-0.269659	0.076936	-0.0243168	-0.311138	-0.375341	-0.241293	-0.0705963
44.9	0.0420889	-0.486889	-0.202816	-0.0524415	0.12436	-0.161155	-0.287624	-0.27666	0.0530065	-0.0280242	-0.266053	-0.367122	-0.255968	-0.0069427
45	0.048997	-0.482423	-0.20728	-0.0292849	0.120681	-0.172974	-0.285453	-0.249135	0.0709611	-0.0298347	-0.219889	-0.360436	-0.275024	-0.0284893
45.1	0.0287692	-0.527046	-0.22448	-0.0129474	0.0887567	-0.192287	-0.303362	-0.267703	0.11713	-0.0281381	-0.188282	-0.376102	-0.292689	-0.0682662
45.2	0.0218825	-0.494513	-0.174501	-0.017845	0.113256	-0.168088	-0.280386	-0.220076	0.0743614	-0.023444	-0.174519	-0.384934	-0.303835	-0.0793968
45.3	0.00504229	-0.483903	-0.190069	-0.0249025	0.136873	-0.168924	-0.294911	-0.20497	0.135813	-0.0180318	-0.172271	-0.336237	-0.306829	-0.0186657
45.4	0.0248949	-0.462089	-0.200902	-0.0324127	0.126158	-0.163555	-0.295815	-0.238591	0.121925	-0.0141658	-0.176214	-0.325319	-0.305386	-0.126903
45.5	0.0554223	-0.477572	-0.223484	-0.0241535	0.156802	-0.162783	-0.330551	-0.250035	0.16243	-0.0129071	-0.182417	-0.30036	-0.306785	-0.241799
45.6	0.0340638	-0.548114	-0.188994	-0.0321599	0.146749	-0.162542	-0.337453	-0.263128	0.0803914	-0.0141599	-0.188713	-0.294446	-0.315328	-0.210031
45.7	0.037051	-0.504184	-0.189016	-0.041488	0.164212	-0.145152	-0.287364	-0.310939	0.105738	-0.0170033	-0.197795	-0.267664	-0.32605	-0.250158
45.8	0.00600693	-0.452928	-0.18007	-0.0155311	0.142459	-0.151909	-0.334913	-0.315555	0.116804	-0.0201314	-0.214784	-0.274958	-0.330151	-0.175102
45.9	-0.0148321	-0.464612	-0.204532	-0.0376042	0.167361	-0.169985	-0.273152	-0.299065	0.096357	-0.0226944	-0.239621	-0.229849	-0.327499	-0.154188
46	-0.000954115	-0.507429	-0.176525	-0.0421526	0.159529	-0.144286	-0.277924	-0.323144	0.114018	-0.0248165	-0.261428	-0.231969	-0.325521	-0.114198
46.1	-0.0348388	-0.449012	-0.199263	-0.0112379	0.177778	-0.0986472	-0.300985	-0.355489	0.102791	-0.0272855	-0.268137	-0.226557	-0.327468	-0.0405142
46.2	0.0175995	-0.46284	-0.20809	-0.0222248	0.192508	-0.0551997	-0.3209	-0.336778	0.131212	-0.0306313	-0.263482	-0.205017	-0.329851	-0.0438635
46.3	0.0204206	-0.45476	-0.211028	-0.0208477	0.157538	-0.0513561	-0.31288	-0.342379	0.0552058	-0.0338362	-0.263138	-0.219297	-0.329058	-0.0718696
46.4	-0.00861983	-0.411122	-0.224212	-0.0279076	0.137376	-0.0467464	-0.305725	-0.359568	0.0992297	-0.0341963	-0.272356	-0.213212	-0.324417	-0.0289936
46.5	-0.00349911	-0.476666	-0.194461	-0.029841	0.130634	-0.0266532	-0.329237	-0.368067	0.0756328	-0.0298072	-0.279509	-0.218717	-0.315498	-0.0674492
46.6	-0.0231552	-0.456794	-0.183583	-0.029499	0.130355	-0.0264527	-0.288844	-0.373545	0.119547	-0.0220103	-0.273821	-0.177484	-0.303296	-0.0359352
46.7	-0.0594195	-0.475051	-0.186731	-0.0203011	0.133531	-0.00811771	-0.260815	-0.381708	0.109189	-0.0141153	-0.255182	-0.195701	-0.293276	0.0366624
46.8	-0.0363645	-0.541168	-0.194986	-0.0188177	0.151781	0.0101701	-0.30186	-0.384003	0.097164	-0.00832908	-0.228034	-0.228227	-0.289131	0.0483742
46.9	-0.0471967	-0.505576	-0.215035	-0.0157526	0.173088	0.00876252	-0.289182	-0.362277	0.087039	-0.00498018	-0.199738	-0.230367	-0.28859	0.0211851
47	-0.0229919	-0.539078	-0.222151	-0.023554	0.232591	0.0141198	-0.286709	-0.356851	0.109516	-0.00338669	-0.178472	-0.261503	-0.291379	0.00377205
47.1	-0.0710946	-0.563322	-0.21346	0.00465167	0.228191	0.0126885	-0.303127	-0.367972	0.0973526	-0.00220536	-0.166382	-0.308689	-0.300463	-0.0293174
47.2	-0.0718021	-0.562903	-0.183311	0.0188221	0.191234	0.0297188	-0.235142	-0.342232	0.0612912	-0.000341679	-0.16154	-0.331361	-0.313997	0.000831056
47.3	-0.0719068	-0.495656	-0.197604	0.0273365	0.166177	0.0169092	-0.249838	-0.371111	0.0825082	0.00156033	-0.16451	-0.345604	-0.327728	-0.0435027
47.4	-0.073308	-0.490202	-0.186862	0.0232405	0.159886	0.00426752	-0.244206	-0.355248	0.128715	0.00217629	-0.1787	-0.315918	-0.340523	-0.0832171
47.5	-0.0516459	-0.507945	-0.211754	0.0199346	0.163371	0.0128209	-0.257788	-0.329376	0.0706764	0.00241164	-0.205551	-0.334218	-0.351202	-0.0620387
47.6	-0.0681267	-0.509903	-0.197568	0.0123209	0.166404	0.00264772	-0.244974	-0.298762	0.0423331	0.00500422	-0.241714	-0.34913	-0.358807	-0.0344079
47.7	-0.0616435	-0.525213	-0.185268	0.00489738	0.155452	0.00198796	-0.256859	-0.301009	0.0693563	0.0105753	-0.283148	-0.303462	-0.365707	-0.0507832
47.8	-0.0707687	-0.503157	-0.188218	0.0136427	0.164039	0.00316906	-0.264047	-0.267731	0.0480155	0.0158084	-0.326903	-0.285035	-0.373224	-0.0497305
47.9	-0.0580126	-0.57273	-0.208368	0.0185983	0.193433	0.00313647	-0.281407	-0.266974	0.0808471	0.0161916	-0.367525	-0.300719	-0.378616	-0.0520311
48	-0.0814464	-0.493848	-0.210357	0.0202211	0.199184	-0.00101652	-0.242455	-0.266872	0.10672	0.00965573	-0.399661	-0.34291	-0.38037	-0.140868
48.1	-0.0551636	-0.540951	-0.209356	0.022605	0.226581	0.0076578	-0.215479	-0.288996	0.0576055	-0.00280511	-0.422097	-0.333768	-0.380971	-0.105342
48.2	-0.0673225	-0.49226	-0.220549	0.0398887	0.230682	0.00959562	-0.19666	-0.336442	0.0610212	-0.0188884	-0.433687	-0.299867	-0.381505	-0.100616
48.3	-0.0342614	-0.533175	-0.218324	0.0160194	0.245725	0.00569313	-0.183608	-0.291672	0.109986	-0.0358532	-0.431602	-0.236733	-0.379371	-0.137673
48.4	-0.0564791	-0.477926	-0.2055	-0.00833379	0.249265	0.00826151	-0.194318	-0.288288	0.0597268	-0.0503481	-0.417392	-0.242827	-0.374074	-0.151001
48.5	-0.0314702	-0.475937	-0.223092	-0.017568	0.250151	0.0335567	-0.217664	-0.291655	0.103937	-0.0597684	-0.399381	-0.260546	-0.369795	-0.23266
48.6	-0.0444249	-0.608342	-0.21523	-0.0205972	0.176211	0.00114261	-0.237918	-0.277441	0.112301	-0.0643729	-0.386182	-0.251795	-0.370271	-0.250552
48.7	-0.0393377	-0.540367	-0.222861	0.00101596	0.229961	0.00345163	-0.255734	-0.249826	0.0843342	-0.0667936	-0.379618	-0.230438	-0.374074	-0.258638
48.8	-0.045058	-0.501805	-0.188556	-0.0115701	0.234623	0.00814968	-0.253076	-0.222384	0.100696	-0.0693335	-0.375784	-0.281673	-0.376209	-0.282909
48.9	-0.0522592	-0.531161	-0.203734	-0.0176307	0.196286	0.0055813	-0.222304	-0.247384	0.0804657	-0.0725047	-0.371693	-0.233075	-0.373691	-0.108393
49	-0.019361	-0.521912	-0.199773	-0.0232172	0.185124	-0.00278074	-0.215817	-0.244205	0.0817099	-0.0755609	-0.368182	-0.217698	-0.367836	-0.0758927
49.1	-0.0266317	-0.516228	-0.2097	-0.0268434	0.175552	0.0174011	-0.199585	-0.269123	0.108128	-0.0772833	-0.366997	-0.207534	-0.361348	-0.0460314
49.2	-0.0187392	-0.557656	-0.226952	-0.00725506	0.151971	0.0355211	-0.217621	-0.230825	0.0825751	-0.0768737	-0.366612	-0.202625	-0.355531	-0.0974025
49.3	-0.0237022	-0.559974	-0.208628	-0.0146088	0.177722	0.0038554	-0.203282	-0.248382	0.0410307	-0.0752944	-0.363248	-0.188837	-0.350911	0.00489432
49.4	-0.0202593	-0.549271	-0.21582	-0.00497487	0.192303	0.0245349	-0.223447	-0.229605	0.0349251	-0.0750213	-0.358255	-0.214851	-0.348657	-0.0101593
49.5	-0.0123033	-0.554753	-0.253787	-0.00202522	0.197502	0.0504075	-0.236925	-0.237817	0.129374	-0.077296	-0.358501	-0.193069	-0.349925	-0.0210947
49.6	0.0295648	-0.613919	-0.236226	-0.0126851	0.202592	0.0688277	-0.268355	-0.24249	0.0871812	-0.0803206	-0.364874	-0.190202	-0.354901	-0.0924739
49.7	0.0325246	-0.543085	-0.278887	-0.00826413	0.217206	0.0376508	-0.239149	-0.232969	0.0903634	-0.0812079	-0.369754	-0.219258	-0.361853	0.0263638
49.8	0.0330409	-0.57436	-0.283661	-8.44e-05	0.235273	0.0593701	-0.207587	-0.260865	0.16618	-0.0793101	-0.370492	-0.253886	-0.366147	-0.00883083
49.9	-0.0120741	-0.532018	-0.322349	2.15e-05	0.266354	0.0820349	-0.204623	-0.279712	0.0484322	-0.0768952	-0.375467	-0.291734	-0.365253	-0.0622485
50	0.013371	-0.521755	-0.342111	0.00359716	0.283276	0.0697672	-0.218408	-0.272179	0.0846618	-0.0764957	-0.392994	-0.30022	-0.36523	-0.0828898
50.1	0.0251819	-0.571409	-0.241956	0.00207783	0.273524	0.0672903	-0.243487	-0.314814	0.0769455	-0.0780118	-0.419655	-0.297654	-0.374789	-0.119958
50.2	0.0250162	-0.615225	-0.175911	-0.00667474	0.262533	0.0424281	-0.262061	-0.29073	0.0966182	-0.0789688	-0.442209	-0.315103	-0.394214	-0.125979
50.3	0.0218579	-0.522256	-0.214336	-0.00352309	0.300352	0.0529816	-0.251493	-0.331721	0.0958951	-0.0775094	-0.450595	-0.303301	-0.416069	-0.164023
50.4	0.0274371	-0.566218	-0.175006	-0.00393222	0.329872	0.0717613	-0.230602	-0.33598	0.0901606	-0.0744045	-0.445284	-0.283131	-0.434256	-0.0803868
50.5	0.0391841	-0.551128	-0.174332	-0.0196029	0.293021	0.0650431	-0.196443	-0.326176	0.0922848	-0.0720479	-0.431765	-0.270784	-0.448493	-0.0435838
50.6	0.0670946	-0.555685	-0.179893	-0.0120517	0.296388	0.0622596	-0.229944	-0.312367	0.0776285	-0.0719066	-0.416599	-0.254156	-0.459687	-0.0521819
50.7	0.0460566	-0.550119	-0.150068	-0.00356391	0.291457	0.0640562	-0.191315	-0.275902	0.0915367	-0.0730363	-0.406704	-0.240912	-0.465547	-0.0374002
50.8	0.0251298	-0.543864	-0.178437	-0.0164077	0.263918	0.0760705	-0.149449	-0.195399	0.0966009	-0.0732296	-0.402027	-0.225637	-0.464729	-0.0264098
50.9	0.0409088	-0.540102	-0.174322	-0.00395382	0.240367	0.0736553	-0.137948	-0.249033	0.103291	-0.071626	-0.396664	-0.223615	-0.459558	-0.0255522
51	0.00929258	-0.535851	-0.199033	-0.0222514	0.235832	0.113068	-0.133095	-0.232711	0.091124	-0.0694651	-0.391378	-0.229855	-0.453058	-0.0451738
51.1	0.0538027	-0.542098	-0.183668	-0.0255839	0.200201	0.119035	-0.0768064	-0.201868	0.0759398	-0.0680189	-0.390686	-0.25241	-0.448175	-0.0786533
51.2	0.032016	-0.596646	-0.25533	-0.018712	0.199452	0.0852484	-0.0936583	-0.194986	0.0930474	-0.0668824	-0.392595	-0.255016	-0.445885	-0.0825917
51.3	0.043907	-0.526666	-0.227843	-0.0190826	0.249055	0.100294	-0.0890754	-0.172834	0.109381	-0.0651091	-0.394121	-0.262703	-0.442567	-0.14065
51.4	0.0680256	-0.607462	-0.283823	-0.0109103	0.265025	0.103521	-0.0557665	-0.192028	0.0892682	-0.0630347	-0.396428	-0.288802	-0.434869	-0.193678
51.5	0.0744841	-0.541394	-0.276807	-0.000578044	0.278599	0.13922	-0.0878371	-0.228566	0.0323247	-0.0616664	-0.399968	-0.240985	-0.42485	-0.226708
51.6	0.0919349	-0.626397	-0.299993	-0.0239875	0.255235	0.142781	-0.102864	-0.240109	0.0539269	-0.0608381	-0.401734	-0.241477	-0.416376	-0.225486
51.7	0.0670751	-0.603329	-0.282633	-0.0064871	0.273422	0.123138	-0.112681	-0.252228	0.112336	-0.0593995	-0.394682	-0.220414	-0.410502	-0.253011
51.8	0.0545875	-0.672443	-0.304365	-0.00795349	0.258261	0.111574	-0.117894	-0.30087	0.142759	-0.0570195	-0.372717	-0.223185	-0.40744	-0.29087
51.9	0.0784547	-0.614325	-0.371743	-0.0300216	0.223315	0.168494	-0.13001	-0.334577	0.0854864	-0.0545999	-0.340197	-0.175911	-0.409214	-0.277848
52	0.0723256	-0.593203	-0.331389	-0.0117845	0.18717	0.139388	-0.145204	-0.351356	0.0754258	-0.0530251	-0.308199	-0.164192	-0.416876	-0.305335
52.1	0.0957594	-0.585101	-0.332319	-0.027467	0.178499	0.120466	-0.163383	-0.340955	0.109258	-0.0524696	-0.28296	-0.175955	-0.42666	-0.357774
52.2	0.0768856	-0.613979	-0.343495	-0.0113102	0.154608	0.112614	-0.189109	-0.318009	0.0993895	-0.0526983	-0.264898	-0.164166	-0.432354	-0.373254
52.3	0.135851	-0.640046	-0.316255	-0.0102915	0.162435	0.147196	-0.154402	-0.347923	0.0548926	-0.0530482	-0.253094	-0.195028	-0.432141	-0.426922
52.4	0.140689	-0.635446	-0.325438	-0.0203132	0.190014	0.135014	-0.160931	-0.313947	0.0894929	-0.0524199	-0.246283	-0.242794	-0.429647	-0.356552
52.5	0.157272	-0.603155	-0.290535	-0.0294292	0.131282	0.109168	-0.156892	-0.316373	0.0861055	-0.0505246	-0.242156	-0.281521	-0.428675	-0.343732
52.6	0.0712151	-0.610834	-0.313498	0.00117002	0.110982	0.120213	-0.126224	-0.385636	0.105816	-0.0489376	-0.237844	-0.258114	-0.4305	-0.321957
52.7	0.0591111	-0.591686	-0.223652	-0.0343198	0.0913765	0.114814	-0.124776	-0.392044	0.092402	-0.0494812	-0.232016	-0.230083	-0.434363	-0.312825
52.8	0.0389189	-0.578503	-0.204995	-0.0278667	0.0657709	0.13241	-0.110365	-0.3426	0.0927486	-0.0516243	-0.225948	-0.276006	-0.438618	-0.338667
52.9	0.0355588	-0.570549	-0.177523	-0.0293211	0.0573034	0.0798583	-0.0967648	-0.385603	0.0802862	-0.0529537	-0.222134	-0.281955	-0.442536	-0.337953
53	0.0399749	-0.621462	-0.156129	-0.0248688	0.0413189	0.0687099	-0.0809057	-0.403422	0.0996003	-0.0522706	-0.222891	-0.260837	-0.447222	-0.312619
53.1	0.0381786	-0.624648	-0.17685	-0.0268745	0.0847046	0.0609133	-0.0802472	-0.39632	0.102219	-0.0509289	-0.229542	-0.273549	-0.454216	-0.327566
53.2	0.020736	-0.560955	-0.159479	-0.0344282	0.0883499	0.022753	-0.108994	-0.420849	0.0762996	-0.0509381	-0.239476	-0.252814	-0.462162	-0.346949
53.3	0.0208742	-0.562921	-0.198335	-0.0200651	0.0913379	0.0305994	-0.0982914	-0.431974	0.0528129	-0.0526648	-0.245277	-0.222931	-0.466649	-0.317912
53.4	0.0155906	-0.571296	-0.179505	-0.0182062	0.0872754	0.0418155	-0.0707288	-0.407997	0.0619777	-0.0547706	-0.24326	-0.250718	-0.466073	-0.306027
53.5	0.0212688	-0.564894	-0.176114	-0.0330508	0.090362	0.0397773	0.00488418	-0.407555	0.095742	-0.0559844	-0.239895	-0.244352	-0.464504	-0.306303
53.6	0.0107408	-0.564968	-0.171673	-0.0176668	0.105058	0.0436063	0.0583297	-0.367477	0.124024	-0.0565416	-0.242606	-0.284016	-0.46575	-0.337287
53.7	0.0139819	-0.554579	-0.172579	-0.0129354	0.154749	0.0308204	0.048434	-0.369032	0.103391	-0.0578769	-0.24996	-0.193777	-0.46864	-0.317989
53.8	0.0191192	-0.587401	-0.193304	-0.0268795	0.198687	0.0313358	0.0655386	-0.404957	0.0577003	-0.0608459	-0.25518	-0.25437	-0.470652	-0.342363
53.9	0.0139379	-0.557617	-0.203576	-0.0197929	0.241463	0.0380454	0.019918	-0.397674	0.111866	-0.0642712	-0.254936	-0.216791	-0.471569	-0.312339
54	-0.00107297	-0.553556	-0.200009	-0.0257066	0.221845	0.0655524	-0.0326269	-0.39814	0.091407	-0.0657701	-0.25272	-0.25931	-0.471819	-0.31097
54.1	-0.0166915	-0.544708	-0.193344	-0.027344	0.291245	0.0486784	-0.0785465	-0.383946	0.10338	-0.0641098	-0.251738	-0.308671	-0.471467	-0.302611
54.2	-0.034521	-0.574708	-0.18503	-0.0205298	0.335521	0.0470847	-0.119417	-0.358005	0.0622685	-0.0601798	-0.248502	-0.290128	-0.47091	-0.255609
54.3	-0.0515298	-0.580245	-0.190337	-0.0295328	0.347773	0.0310178	-0.15127	-0.407342	0.104798	-0.0559917	-0.239598	-0.284332	-0.470358	-0.184789
54.4	-0.0389233	-0.605576	-0.208416	-0.0327307	0.386041	0.0374918	-0.199912	-0.405881	0.0876396	-0.0534794	-0.228154	-0.299212	-0.470944	-0.191606
54.5	-0.0277479	-0.577493	-0.206526	-0.0452997	0.40167	-0.00414744	-0.185206	-0.370751	0.0704177	-0.0536795	-0.218426	-0.237011	-0.475268	-0.168237
54.6	-0.0809738	-0.554524	-0.217859	-0.0299591	0.388089	0.0354181	-0.200232	-0.349474	0.136038	-0.056254	-0.208816	-0.239831	-0.482689	-0.271859
54.7	-0.0667258	-0.562296	-0.189804	-0.0271033	0.350367	0.0328821	-0.227275	-0.342474	0.082039	-0.05998	-0.194282	-0.239798	-0.487031	-0.340357
54.8	-0.0813194	-0.598727	-0.19704	-0.0370551	0.311822	0.0562392	-0.222546	-0.330788	0.0854394	-0.0635393	-0.174871	-0.234321	-0.483729	-0.303756
54.9	-0.0671956	-0.635917	-0.191676	-0.0317311	0.304511	0.0409673	-0.253592	-0.386606	0.135251	-0.0656514	-0.157898	-0.207248	-0.475193	-0.256702
55	-0.0626304	-0.606598	-0.190275	-0.0317097	0.283704	0.068015	-0.289381	-0.394687	0.112964	-0.0656363	-0.150661	-0.188413	-0.465094	-0.227465
55.1	-0.0830049	-0.596939	-0.205191	-0.028784	0.240519	0.0513558	-0.260833	-0.355076	0.136686	-0.0643956	-0.153832	-0.148562	-0.452679	-0.259966
55.2	-0.101603	-0.585629	-0.241884	-0.014498	0.231928	0.0310058	-0.263281	-0.38596	0.115638	-0.0637171	-0.162226	-0.199472	-0.435993	-0.301001
55.3	-0.086675	-0.642433	-0.203281	-0.025141	0.23604	-0.0125301	-0.283375	-0.371565	0.053177	-0.0646258	-0.166624	-0.23179	-0.416921	-0.358021
55.4	-0.098817	-0.597962	-0.213276	-0.0281747	0.276512	0.0140346	-0.277952	-0.384781	0.0839711	-0.0671893	-0.154304	-0.260581	-0.400448	-0.389488
55.5	-0.100644	-0.576634	-0.218412	-0.0187505	0.318548	-0.0260404	-0.282816	-0.380112	0.0775926	-0.0708526	-0.121503	-0.232302	-0.389018	-0.282531
55.6	-0.115118	-0.608014	-0.233236	-0.0375729	0.338372	-0.00594111	-0.316196	-0.4233	0.0977129	-0.0740314	-0.0880399	-0.256029	-0.379869	-0.282578
55.7	-0.139922	-0.603216	-0.23347	-0.0264001	0.311073	-0.0388943	-0.285776	-0.405055	0.0897157	-0.0748077	-0.0799678	-0.223346	-0.369335	-0.295108
55.8	-0.0878628	-0.626818	-0.214461	-0.028507	0.303582	-0.0123679	-0.261573	-0.432232	0.161859	-0.0730805	-0.0986827	-0.198166	-0.358267	-0.218524
55.9	-0.103653	-0.587353	-0.241594	-0.0296797	0.27452	-0.00850637	-0.284652	-0.448369	0.159335	-0.0709953	-0.12598	-0.188526	-0.352255	-0.134589
56	-0.0969104	-0.570586	-0.219493	-0.0256177	0.226168	-0.0179729	-0.293093	-0.451331	0.10111	-0.0706961	-0.149737	-0.196202	-0.355856	-0.226437
56.1	-0.080109	-0.625655	-0.241934	-0.0152806	0.18187	-0.0234574	-0.280461	-0.416598	0.13173	-0.0724931	-0.168305	-0.227991	-0.368331	-0.210552
56.2	-0.0770663	-0.61739	-0.212184	-0.0219842	0.191012	-0.0271508	-0.302714	-0.419793	0.141028	-0.0751309	-0.182178	-0.263209	-0.386416	-0.245347
56.3	-0.0763867	-0.613561	-0.181054	-0.0291091	0.16518	-0.033722	-0.320135	-0.424675	0.150507	-0.0769602	-0.195804	-0.334629	-0.406468	-0.132745
56.4	-0.0896453	-0.614028	-0.199675	-0.0214135	0.179325	-0.0339488	-0.290837	-0.446229	0.0866853	-0.0771981	-0.217788	-0.304514	-0.42362	0.0918146
56.5	-0.0968219	-0.647506	-0.189298	-0.0249289	0.175473	-0.0147095	-0.297213	-0.466708	0.100164	-0.0765544	-0.24684	-0.316639	-0.434307	0.0256561
56.6	-0.0964487	-0.599937	-0.195447	-0.0298988	0.174741	0.00652675	-0.318488	-0.431156	0.125892	-0.0762576	-0.26861	-0.368968	-0.439161	0.0300925
56.7	-0.0826317	-0.62641	-0.203248	-0.0341272	0.203707	-0.01458	-0.298085	-0.448541	0.163334	-0.0767699	-0.276949	-0.327221	-0.441982	0.0120864
56.8	-0.0938512	-0.613836	-0.217541	-0.0129788	0.183816	0.0106975	-0.298184	-0.477518	0.0742244	-0.0780464	-0.282405	-0.351782	-0.446408	0.0289552
56.9	-0.105184	-0.628596	-0.192496	-0.0276307	0.203495	-0.0264379	-0.313414	-0.436328	0.0909437	-0.0803364	-0.291238	-0.345204	-0.4517	0.0903267
57	-0.0937877	-0.600044	-0.221848	-0.0122707	0.201926	-0.00305158	-0.307254	-0.424703	0.107321	-0.0838398	-0.295872	-0.351879	-0.453329	0.0719638
57.1	-0.0873793	-0.586459	-0.218277	-0.0105732	0.196675	-0.00944921	-0.284271	-0.432567	0.125995	-0.087907	-0.292527	-0.360376	-0.450239	0.072678
57.2	-0.0780031	-0.588138	-0.210435	-0.0145196	0.174606	-0.0379045	-0.303408	-0.466254	0.109976	-0.0912155	-0.28929	-0.349955	-0.446433	0.0668734
57.3	-0.0912896	-0.591756	-0.227315	-0.0193451	0.16814	-0.0306618	-0.285043	-0.454044	0.119471	-0.092687	-0.292465	-0.32077	-0.443587	0.062935
57.4	-0.110738	-0.589906	-0.228241	-0.00793177	0.153634	-0.0520513	-0.306052	-0.444408	0.0903808	-0.0920985	-0.29867	-0.304104	-0.438932	0.0843639
57.5	-0.0915576	-0.604367	-0.256244	-0.0222322	0.158576	-0.0450119	-0.274767	-0.42965	0.117851	-0.0901861	-0.302118	-0.270777	-0.43076	0.0599831
57.6	-0.11015	-0.593328	-0.219003	-0.0224056	0.141825	-0.0403845	-0.281058	-0.435648	0.0668789	-0.0882781	-0.299945	-0.202232	-0.420829	0.100342
57.7	-0.113435	-0.577732	-0.254595	-0.0358007	0.125524	-0.0555386	-0.290584	-0.464703	0.106249	-0.087391	-0.291844	-0.197345	-0.412144	0.149284
57.8	-0.0985518	-0.569605	-0.241426	-0.0390369	0.111374	-0.0616474	-0.27792	-0.44535	0.123955	-0.0877352	-0.281766	-0.113394	-0.405912	0.148949
57.9	-0.0930968	-0.591376	-0.246608	-0.0326125	0.0831251	-0.0477422	-0.281695	-0.450255	0.0870784	-0.0893186	-0.275925	-0.0909474	-0.399793	0.142953
58	-0.097018	-0.60072	-0.22123	-0.0337876	0.0615157	-0.0626046	-0.290171	-0.448549	0.160562	-0.0922425	-0.276405	-0.0782271	-0.390146	0.164517
58.1	-0.0950175	-0.617636	-0.241488	-0.0221262	0.0818365	-0.0557596	-0.265577	-0.469764	0.117032	-0.0959717	-0.28016	-0.123215	-0.3763	0.0837015
58.2	-0.102177	-0.602445	-0.230648	-0.0292896	0.0636945	-0.0765215	-0.301718	-0.446757	0.101704	-0.0994688	-0.283828	-0.0979444	-0.361839	0.0602333
58.3	-0.104029	-0.614841	-0.229852	-0.0293786	0.0529178	-0.0616297	-0.308592	-0.439768	0.0965239	-0.102556	-0.287747	-0.124142	-0.351246	0.0561517
58.4	-0.100102	-0.599682	-0.246357	-0.0392414	0.054887	-0.0785068	-0.290819	-0.465894	0.122107	-0.10593	-0.293735	-0.138703	-0.345161	0.00779128
58.5	-0.1212	-0.63658	-0.225959	-0.0231376	0.0336562	-0.0887303	-0.325181	-0.45954	0.138462	-0.109541	-0.301465	-0.143718	-0.341673	-0.0921391
58.6	-0.0910769	-0.65104	-0.214581	-0.0111823	0.0252682	-0.088595	-0.319936	-0.454253	0.145989	-0.112285	-0.309183	-0.162732	-0.341701	-0.0775122
58.7	-0.088935	-0.67745	-0.220444	-0.0181941	0.0575988	-0.102079	-0.319694	-0.461462	0.0970483	-0.113536	-0.31403	-0.183371	-0.347497	-0.11928
58.8	-0.0834136	-0.603418	-0.222394	-0.0211005	0.0544354	-0.0796144	-0.322939	-0.45616	0.0996766	-0.113974	-0.313354	-0.266825	-0.357078	-0.111157
58.9	-0.083505	-0.592982	-0.205163	-0.0110934	0.0516548	-0.0911428	-0.344467	-0.476057	0.100549	-0.114801	-0.308043	-0.261121	-0.365056	-0.133341
59	-0.0903581	-0.598308	-0.20743	-0.016658	0.0626353	-0.0809396	-0.342225	-0.466761	0.10076	-0.116623	-0.301161	-0.267167	-0.367274	-0.196034
59.1	-0.095421	-0.591241	-0.205421	-0.03196	0.0461475	-0.109413	-0.345549	-0.448873	0.103676	-0.118529	-0.295514	-0.339825	-0.363117	-0.249551
59.2	-0.0890179	-0.598616	-0.194565	-0.00161595	0.0438939	-0.1151	-0.34726	-0.473369	0.116	-0.117727	-0.294509	-0.373545	-0.355813	-0.26664
59.3	-0.0942106	-0.589691	-0.218828	-0.0105226	0.0463338	-0.0873518	-0.350925	-0.440546	0.0656986	-0.111331	-0.299463	-0.377576	-0.35026	-0.302983
59.4	-0.0870725	-0.615228	-0.206244	-0.015837	0.0434293	-0.123919	-0.347947	-0.447927	0.13317	-0.0998858	-0.306746	-0.411955	-0.348838	-0.31214
59.5	-0.115646	-0.622785	-0.204907	-0.0161789	0.0530269	-0.116874	-0.334319	-0.439359	0.142449	-0.0881792	-0.314024	-0.363236	-0.350082	-0.329495
59.6	-0.111288	-0.649165	-0.246288	-0.0222131	0.0384015	-0.113578	-0.308724	-0.466282	0.148527	-0.0808654	-0.322526	-0.394592	-0.35114	-0.28953
59.7	-0.128764	-0.614097	-0.197148	-0.0315169	0.039568	-0.107766	-0.332685	-0.487743	0.063474	-0.0777341	-0.32781	-0.381153	-0.350753	-0.346647
59.8	-0.103086	-0.676493	-0.197253	-0.0140623	0.0476395	-0.118482	-0.320972	-0.466188	0.0959147	-0.074917	-0.322331	-0.4154	-0.351572	-0.339856
59.9	-0.0913365	-0.607363	-0.210177	-0.0324149	0.050161	-0.139889	-0.34277	-0.454588	0.0983389	-0.0703818	-0.308831	-0.385191	-0.357884	-0.318751
60	-0.103708	-0.628997	-0.20266	-0.0283361	0.0843602	-0.111174	-0.365407	-0.474282	0.134922	-0.0660067	-0.296284	-0.35016	-0.368838	-0.302954
Fig. 4 H
Herm excretome	Male excretome
-0.01087	0.402837
-0.03974	0.773201
0.020586	0.562627
-0.01585	0.536787
-0.00756	0.358786
0.011999	0.802947
-0.02553
0.007339
Fig. 4 I
	tax-2 (Herm-cond)	tax-2 (Male-cond)	tax-2 AWB resc (Herm-cond)	tax-2 AWB resc (Male-cond)	tax-2 ASJ resc (Herm-cond)	tax-2 ASJ resc (Male-cond)
Paralyzed % (80 min)	31.82	41.67	66.67	90.48	10	19.05
	36	37.93	56.52	80	33.33	27.27
	36	50	62.5	73.08	44.44	35.71
Fig. 4 J
	odr-3 (Herm-cond)	odr-3 (Male-cond)	odr-3 AWB resc (Herm-cond)	odr-3 AWB resc (Male-cond)
Paralyzed % (80 min)	52	20.83	21.74	46.15
	73.08	33.33	28	43.48
	45.83	26.09	22.73	37.5
[truncated: 24 more columns]
