# Supplementary material for: Male pheromones modulate synaptic transmission at the C. elegans neuromuscular junction in a sexually dimorphic manner
Source: eLife. 2021 Mar 31;10:e67170. doi: 10.7554/eLife.67170 (PMC8051947; doi:10.7554/eLife.67170)
Supplement: Figure 5—source data 1. [file elife-67170-fig5-data1.xlsx]

## Sheet: Fig 5
Fig. 5 A
Punc-129::RAB-3 Puncta F
Herm-cond	1.28655	1.148	1.09878	0.878135	0.593531	1.32205	0.593422	1.77468	1.60184	0.842103	0.987581	1.34131	0.607006	1.66035	0.632404	0.908181	0.989463	0.26899	0.933278	1.31673	0.85629	0.954665	0.536773	1.08962	0.96107	0.913866	0.598085	0.760693	1.54455
Male-cond	2.01329	1.85746	1.62667	0.868513	2.24903	0.853198	0.840403	0.948766	1.23991	0.670137	1.91608	1.25477	1.35272	1.03614	1.14616	0.613738	1.18632	0.654406	1.07191	0.563348	0.810979	0.975353	1.11817	1.16704	0.549125	1.92491	1.17789	1.4288	1.02187	0.989783	0.775509	0.597455	0.757043	0.952865
Punc-129::RAB-3 Density
Herm-cond	1.00063	0.88181	0.913106	0.930423	1.19136	1.04655	0.884227	1.28292	0.917793	0.932923	1.02512	0.953649	0.775057	0.776573	1.04042	1.02782	1.11682	0.811382	0.888753	0.996896	0.945739	1.08035	0.934004	1.11716	1.27499	1.00701	1.02462	1.10543	1.11648
Male-cond	0.969212	1.13266	0.899781	1.2052	0.976998	0.905017	1.07292	1.0827	0.846683	1.25282	0.833423	0.862159	1.09684	0.904045	1.12696	0.93038	1.20239	1.10345	1.16189	1.05981	0.813108	1.24363	1.09684	0.978288	1.05123	0.928654	1.05283	0.956696	0.981058	1.07572	1.07039	1.29862	1.15608	0.924344	0.943846
Fig. 5 B
Punc-25::RAB-3 Puncta F
Herm-cond	0.428926	0.479179	0.27912	1.58973	0.279179	0.73145	0.832738	0.65525	0.811109	1.73605	0.729096	2.69333	1.42979	1.44049	1.92559	1.98193	0.514983	1.15406	0.613032	0.405866	0.243751	0.298845	0.491563	1.20824	0.760053	0.937928	2.06014	1.28858
Male-cond	0.407733	0.676321	1.01822	1.12029	1.23473	0.691727	0.484031	0.576412	0.222392	0.570527	1.04952	0.293158	0.418607	1.00656	0.801739	0.786701	2.24433	0.619489	1.21243	1.70689	1.09527	0.969051	0.651739	1.44101	1.00026	0.82615	0.317028	1.00563	2.12224	1.13833	1.02318	0.19806
Punc-25::RAB-3 Density
Herm-cond	0.813786	0.948136	0.731212	0.863444	1.01386	1.02167	1.14221	0.929883	1.1555	1.16618	1.00935	0.969805	1.09682	0.915181	0.817222	1.32978	1.01406	0.7821	0.841568	1.08953	0.805256	0.81531	1.2412	1.08784	1.0528	0.984457	1.10815	1.25367
Male-cond	0.879807	0.747562	1.07536	0.773008	0.882746	0.935405	0.883252	0.934424	0.901261	1.0408	1.00416	1.07824	0.901576	1.17764	1.14969	1.16124	1.22229	1.06511	0.849279	0.913991	1.03474	0.891438	1.07431	0.916228	0.961931	0.856875	1.20992	0.953198	0.988392	1.07723	1.01681	0.877689
Fig. 5 C
Pmyo-3::acr-16 Puncta F
Herm-cond	0.495801	1.33086	1.08444	0.770994	0.907702	0.756087	1.03545	1.03223	0.992875	0.931137	0.891351	0.601883	0.977168	0.635634	1.39471	0.703658	0.92933	1.06407	1.03663	1.16997	1.12466	0.945843	1.09221	0.807611	0.819729	1.71246	1.35566	1.29697	1.07842	0.995571	0.934301	0.966888	1.1277
Male-cond	0.681043	1.51516	1.5608	1.03989	0.801554	0.994086	1.25042	1.16411	0.810417	1.39364	1.03257	0.877957	1.14047	1.20478	1.8031	0.940801	0.726955	0.881272	0.967182	0.953637	0.956184	1.2524	1.7494	1.54441	1.61582	1.47729	1.26149	1.74448	1.0256	1.21299	2.02521	1.08921	1.12601	0.790303	1.28037	1.03452	1.16372	1.07136	1.45742	1.49554
Pmyo-3::acr-16 density
Herm-cond	0.791195	1.21995	1.0346	0.706309	1.08026	1.14305	1.09224	0.892364	1.16562	0.891122	0.904119	0.72953	0.544543	0.595479	1.25684	0.60596	0.89316	1.06639	0.726008	1.118	1.31212	0.819135	1.04546	1.34326	1.48154	1.38155	1.38644	0.931087	1.18664	0.852822	0.747692	1.1181	0.937401
Male-cond	0.832326	1.14404	1.47743	1.08842	0.781456	1.41567	0.527504	1.23884	0.683057	1.1345	1.16379	1.04317	1.37503	1.39712	1.292	1.6927	0.749238	0.775651	1.58836	0.861691	1.32707	1.70344	0.755486	0.971604	1.0528	1.11934	0.752985	1.33692	1.28526	1.07536	1.15625	1.01177	1.0513	1.15916	1.39996	1.36014	1.19762	0.868521	1.14077	0.824455	0.823931
Fig. 5 D
Punc-29::unc-29 Puncta F
Herm-cond	0.786675	0.613482	1.11715	0.53769	1.46889	0.670317	0.670317	1.46121	0.868223	1.19159	0.559061	1.11571	1.12365	0.89946	0.581829	0.718109	1.11712	1.23848	0.554263	1.42883	1.23361	0.926839	0.942307	1.05256	1.04856	1.01604	1.32681	1.34279	0.794003	1.46767	0.963703	1.01751	1.05043	1.09512
Male-cond	1.78452	1.07064	1.52634	1.64935	0.839175	1.32635	1.24356	1.03103	1.07082	0.862607	0.692194	1.08589	1.1363	1.38661	1.04672	0.852283	1.3881	1.3403	2.00602	0.882448	1.72308	0.862324	1.09973	0.793367	1.44034	2.1852	1.46386	1.3098	1.53658	2.26861	1.27514	1.19636	1.24281	1.46247	0.846842
Punc-29::unc-29 Density
Herm-cond	0.959655	0.951725	1.08226	0.998172	0.90727	1.01217	0.959603	0.959603	0.920003	1.03262	0.892922	0.88737	0.886384	1.28608	1.00048	0.904912	0.953588	1.06258	1.07611	1.0085	1.18724	1.10814	0.715649	1.18194	0.933129	0.988868	0.990883	0.93958	1.05931	1.05038	1.20659	0.928961	1.12757	0.942231	0.897516
Male-cond	0.943853	1.04665	1.10661	0.983013	1.02305	0.922946	1.07068	0.847917	1.18487	0.887705	0.721434	1.03195	1.09862	1.04616	1.04106	1.018	1.12195	0.938626	0.908677	0.978955	1.05128	1.14236	1.03311	1.14123	1.02623	0.888705	0.919215	0.834532	1.0465	1.17875	0.95492	1.042	1.01592	0.98249	1.07551
Fig. 5 E
Punc-49::unc-49 Puncta F
Herm-cond	0.83318	1.00912	0.698804	1.32243	1.02322	0.810146	1.09772	0.87258	0.45047	0.909247	1.18116	1.06689	0.921398	1.3251	1.32074	0.898375	0.663743	0.704026	0.935872	1.15412	1.14008	0.69433	0.93203	1.44889	0.87686	0.730905	1.72022	0.977879	0.92391	1.13834	0.767654	1.08306	1.25319	1.11431
Male-cond	0.604408	1.09177	0.826445	0.872264	0.59211	1.30119	1.30124	1.35173	0.766679	0.744197	1.22446	0.897594	0.881088	1.31016	0.882519	1.03201	1.13624	1.32244	0.570625	1.14543	1.14015	1.51343	1.34909	1.05174	1.51656	0.945049	0.610935	1.17899	1.02173	1.04521	0.993904	0.93824	1.37772	0.88966	1.04289
Punc-49::unc-49 Density
Herm-cond	0.992827	0.837491	1.03077	0.926864	0.93806	1.05686	1.08467	0.998392	1.03901	1.09722	0.851667	1.05032	1.13092	1.21952	1.01874	0.987977	0.931078	0.925126	1.04495	0.884015	1.04047	1.0012	1.01775	0.782854	0.946597	1.08231	0.896069	0.8865	0.936997	1.07706	1.01521	1.15745	1.08764	1.02543
Male-cond	1.07553	0.84657	0.856065	0.926037	0.930477	0.993645	0.885983	0.97926	1.01785	1.12184	1.0765	0.962038	0.989719	1.087	1.01395	1.17712	0.77151	1.03803	1.05676	1.13983	1.0308	0.778293	1.09485	1.0394	0.834256	1.05758	0.998314	0.963981	0.957089	1.03408	1.03187	0.987438	0.938859	0.960231	1.1084
