# Supplementary material for: Male pheromones modulate synaptic transmission at the C. elegans neuromuscular junction in a sexually dimorphic manner
Source: eLife. 2021 Mar 31;10:e67170. doi: 10.7554/eLife.67170 (PMC8051947; doi:10.7554/eLife.67170)
Supplement: Figure 6—figure supplement 1—source data 1. [file elife-67170-fig6-figsupp1-data1.xlsx]

## Sheet: Figure 6-figure supplement 1
Figure 6-figure supplement 1A
Punc-129::UNC-57::mCherry Puncta F
Herm-cond	0.841217	0.838178	0.466299	1.56007	1.14298	1.30549	0.844767	1.05928	1.18515	2.00404	0.959958	0.72886	0.71684	0.876677	1.05926	0.677619	1.02352	1.81132	0.806779	1.83592	1.44182	0.917718	0.748206	1.06529	1.11503	1.31173	0.859473	0.889917	0.740652	0.86855	0.97565	0.873734	0.956009	0.703085	0.547896	1.08168	0.576201	0.583139
Male-cond	0.697598	1.32807	0.747625	1.49395	1.07127	1.15971	1.00923	1.04263	0.583383	0.965935	1.82874	1.10936	0.996978	1.5008	0.787995	0.773683	1.17304	0.712444	1.22988	0.549982	0.610828	1.1036	1.23705	1.09274	1.35238	1.00705	0.943024	1.19978	0.684463	1.33462	0.861934	0.848731	0.957205	1.30025	0.649228
Punc-129::UNC-57::mCherry Density
Herm-cond	1.06581	0.96683	0.899246	0.950322	1.13439	1.11101	1.00361	1.04292	0.926506	1.01607	1.12127	0.863741	0.975114	0.9809	0.863108	0.804683	0.851082	1.12176	0.942987	1.04909	0.956515	0.96032	1.09339	0.944079	0.845931	1.06212	1.31269	0.989157	1.2049	1.02019	1.00767	0.74252	1.09872	1.13829	1.04895	0.832078	1.08772	0.964307
Male-cond	1.11717	1.00802	0.893411	0.923777	0.847931	0.973345	1.00532	0.986502	0.82457	0.995487	1.01964	0.976036	1.0599	1.03661	0.961781	1.24357	0.793087	1.00948	0.938285	1.07389	1.02773	0.992001	1.12584	0.882238	0.883745	0.970351	1.12608	1.04093	1.00557	1.0386	0.974236	1.12138	1.06459	1.02214	1.10247
Figure 6-figure supplement 1B
Punc-47::UNC-57::mCherry Puncta F
Herm-cond	1.23672	0.848818	0.626454	1.4531	1.09413	0.862097	0.926562	0.882267	0.765599	1.01583	0.804037	0.785662	0.385548	0.794183	1.13243	0.956715	0.5088	1.27564	1.10993	1.70928	1.02798	0.82329	1.0254	0.888394	0.861067	0.677562	1.0174	1.89163	0.828009	1.03688	0.877757	1.24503	1.51776	1.11969	0.984407	1.00395
Male-cond	1.02511	1.6419	1.39273	0.566256	0.655909	1.04913	1.39956	1.02171	1.29586	1.67474	1.46066	1.02509	0.642478	1.07234	1.01517	0.576798	0.828935	1.06566	0.709653	1.13904	1.14147	0.703342	1.06947	0.532024	0.526784	0.892046	1.54857	1.0946	1.00987	0.498581	1.22225	0.902341	1.10577	1.31318	1.78842	0.992612	1.08132
Punc-47::UNC-57::mCherry Density
Herm-cond	0.899742	1.03892	0.928451	0.783163	1.14611	0.823114	0.928753	1.0703	1.04017	0.990693	1.14095	0.952899	1.15663	0.904468	0.911999	0.977837	1.22938	0.913537	0.914362	1.05791	0.936645	1.13857	1.0491	0.964529	0.902372	0.799765	1.18628	0.956593	1.00087	0.969949	1.18819	0.90999	0.855307	1.06425	1.18819	1.08002
Male-cond	0.916314	1.24249	1.25987	0.864663	1.15836	0.979149	0.993056	1.04983	0.773428	1.13735	0.893949	1.08372	0.846731	0.863033	1.04064	0.936186	1.00323	0.905792	1.11625	0.835502	0.994082	1.21368	0.735796	0.836187	1.12625	1.00006	0.8858	1.13505	1.14564	1.30847	1.01653	1.01315	1.03051	1.23112	0.773043	1.03676	1.16136
