# Supplementary material for: Male pheromones modulate synaptic transmission at the C. elegans neuromuscular junction in a sexually dimorphic manner
Source: eLife. 2021 Mar 31;10:e67170. doi: 10.7554/eLife.67170 (PMC8051947; doi:10.7554/eLife.67170)
Supplement: Figure 6—source data 1. [file elife-67170-fig6-data1.xlsx]

## Sheet: Fig 6
Fig. 6 D
UNC-2::GFP11 + Punc-129::GFP1-10 Puncta F
Herm-cond	0.978378	0.932585	1.41747	1.53367	1.02947	0.939339	1.09325	1.16257	0.921593	0.773444	0.818906	0.880106	0.949546	0.91772	0.943561	0.791744	0.904691	0.933149	0.914779	1.39191	1.09376	1.05758	0.925589	1.22379	0.81165	0.936575	1.07352	0.863277	1.07075	0.96002	0.755595
Male-cond	1.45857	1.04013	1.21097	1.3754	1.1091	1.3295	1.12569	1.18897	1.52373	0.844033	1.148	1.78125	1.31477	0.9681	1.23204	0.906186	0.913142	0.759637	1.00608	1.12064	1.26267	1.29634	0.887635	0.694511	1.04923	1.17943	1.19961	1.20931	0.946941	0.904758	1.2022	1.42603	1.47512	1.82301	1.27989	1.24788	1.24662	1.2379	1.27033	1.00749
UNC-2::GFP11 + Punc-129::GFP1-10 Density
Herm-cond	1.01312	0.644146	1.15714	1.13748	0.936587	1.03038	0.910055	1.38712	1.03907	1.00734	0.693692	0.722161	0.91551	0.893946	1.16233	0.995798	1.07798	0.871313	1.03358	1.25887	1.11228	0.983719	1.15289	0.852762	0.928073	1.13794	0.894027	0.967198	1.16986	0.899772	1.01384
Male-cond	1.21978	1.01305	1.10925	1.22467	1.31915	1.15431	1.27174	1.11953	0.908028	1.01425	1.04949	1.01191	1.01398	1.10449	1.01375	0.745162	0.622982	0.969026	1.31197	0.868599	1.22294	0.719179	1.10648	1.20468	1.16131	0.850283	1.03933	1.39312	1.18765	0.756144	1.20914	1.07726	1.10724	1.42231	1.27361	1.23162	1.35455	0.951832	1.08377	1.20172
Fig. 6 E
UNC-2::GFP11 + Punc-47::GFP1-10 Puncta F
Herm-cond	1.10085	1.53492	0.793403	0.918024	1.09151	1.42863	1.33569	1.02967	0.76583	1.03967	0.699535	0.967473	0.721708	1.26583	0.838379	0.771119	1.0257	0.950084	0.643508	1.1952	0.704197	0.891614	0.94666	1.1001	1.1001	0.733872	1.13004	1.08892	1.11447	0.840169	1.19061	1.04251
Male-cond	0.724182	0.99991	1.12044	1.27551	0.620639	1.08437	1.11548	0.716627	0.911537	0.945235	0.977448	1.11229	0.91034	0.86159	1.19998	1.00963	0.872815	1.26863	1.21732	1.10544	0.847237	1.07088	1.41036	1.57838	0.85166	1.17396	0.610144	0.935435	1.15547	0.790933	1.17423	0.927907
UNC-2::GFP11 + Punc-47::GFP1-10 Density
Herm-cond	1.07962	0.835205	0.889849	0.745394	0.829444	0.990503	1.00916	1.05606	1.04436	1.13056	0.97764	0.872434	0.727047	0.998362	1.45793	1.2348	0.919375	0.853311	0.79839	1.08546	0.964362	1.21915	1.16298	0.536378	0.536378	1.06361	1.17977	1.50059	1.2502	1.00403	0.974074	1.07357
Male-cond	0.589051	1.3687	0.672366	0.977231	0.508324	1.22594	1.63044	0.715579	0.640585	1.10786	1.19197	1.44923	1.38541	1.25906	1.15353	1.25113	1.42521	0.926736	1.2667	0.884335	0.890174	1.04714	1.2348	1.1383	0.794698	0.971482	0.812035	0.917962	1.10479	1.02198	1.28447	1.24648
