# Supplementary material for: Male pheromones modulate synaptic transmission at the C. elegans neuromuscular junction in a sexually dimorphic manner
Source: eLife. 2021 Mar 31;10:e67170. doi: 10.7554/eLife.67170 (PMC8051947; doi:10.7554/eLife.67170)
Supplement: Figure 7—source data 1. [file elife-67170-fig7-data1.xlsx]

## Sheet: Fig 7
Fig. 7 B
mEPSC rate (Hz)
N2 (Herm-cond)	49.3	33.2	62.7	34	63.3	35.6	51.7	46.5	67.5	50.7	43.2	43.5	52.3
N2 (Male-cond)	96.4	59.1	66.4	85	58.7	62.9	30.1	107.1	54.7	39.1	58	62.3
unc-2 (Herm-cond)	15.3	12.2	16.7	29	33.9	24.2	18.2	14.4	11.9	20.4	28.6	19.6	20.8
unc-2 (Male-cond)	26.3	22.9	17.1	18	17.9
Fig. 7 C
mEPSC amp (pA)
N2 (Herm-cond)	27.2	21.8	31.2	27.2	22.4	19.1	24.8	17	23.8	27	23.4	24.6	32.8
N2 (Male-cond)	23.2	22.6	28.7	28.1	23.3	45.2	24.3	21.9	26.1	23.3	24.7	23.2	22.8
unc-2 (Herm-cond)	22.3	21.5	20.2	25.4	28.4	23.1	22.9	21.5	21.1	21.2	22.4	28.1	23
unc-2 (Male-cond)	22.2	19.4	20.6	22.3	40.7	20.3
Fig. 7 D	Peristaltic Speed (um/s)
N2 (Herm-cond)	243.91	287.91	327.36	219.84	303.86	222.39	268.53	285.72	224.9	187.58	295.15	298.31	213.71	346.81	242.48	278.99	258.39	256.05	312.06	226.34	242.49	603.09	246.96	265.82	271.1	277.53	292.7	228.36	258.15	301.09	228.66	268.98
N2 (Male-cond)	269.03	279.1	236.61	157.16	170.81	273.34	226.11	211.25	213.24	146.79	249.3	237.2	275.09	275.9	266.57	210.34	173.86	236.22	216.41	205	190.94	304.58	268.13	538.89	259.05	288.46	265.25	244.46	254.27	274.74	320.18	257.41	176.85	293.66	297.02	289.19	246.23	258.27	267.4	260	275.31	195.51	272	112.9	228.61	188.69	223.98	235.38	227.44
unc-2 (Herm-cond)	63.07	99.69	34.91	54.84	62.01	116.98	33.33	98.33	119.63	95.54	52.97	71.94	65.9	80.83	57.02	76.46	44.65	51.57	63.32	79.23	79.77	107.56	158.07	61.17	85.3	90.27	59.72	73.48	153.03	99.52	49.68	92.28	63.27	83.98	75.1	107.27	63.55	54.53	80.98	107.29	93.98	67.28	84.01	57.21	68.11	109.25	65.43	60.93	91.9
unc-2(Male-cond)	83.97	77.85	137.35	131.48	87.61	60.75	94.74	101.29	91.07	74.46	82.35	80.8	79.64	65.55	80.13	72.41	87.99	58.45	114.4	64.19	122.02	53.66	80.12	70.71	108.15	95.29	66.36	65.94	82.02	60.03	68.28	92.5	55.43	77.61	103.2	78.44	73.13	51.59	63.17	64.51	55.15	93.22	104.11	83.72	44.42	59	81.24	97.81	74.8
[truncated: 7 more columns]
