# Supplementary figures and images for: Male pheromones modulate synaptic transmission at the C. elegans neuromuscular junction in a sexually dimorphic manner
Source: eLife journal article supplement (doi:10.7554/elife.67170), 2021-03-31

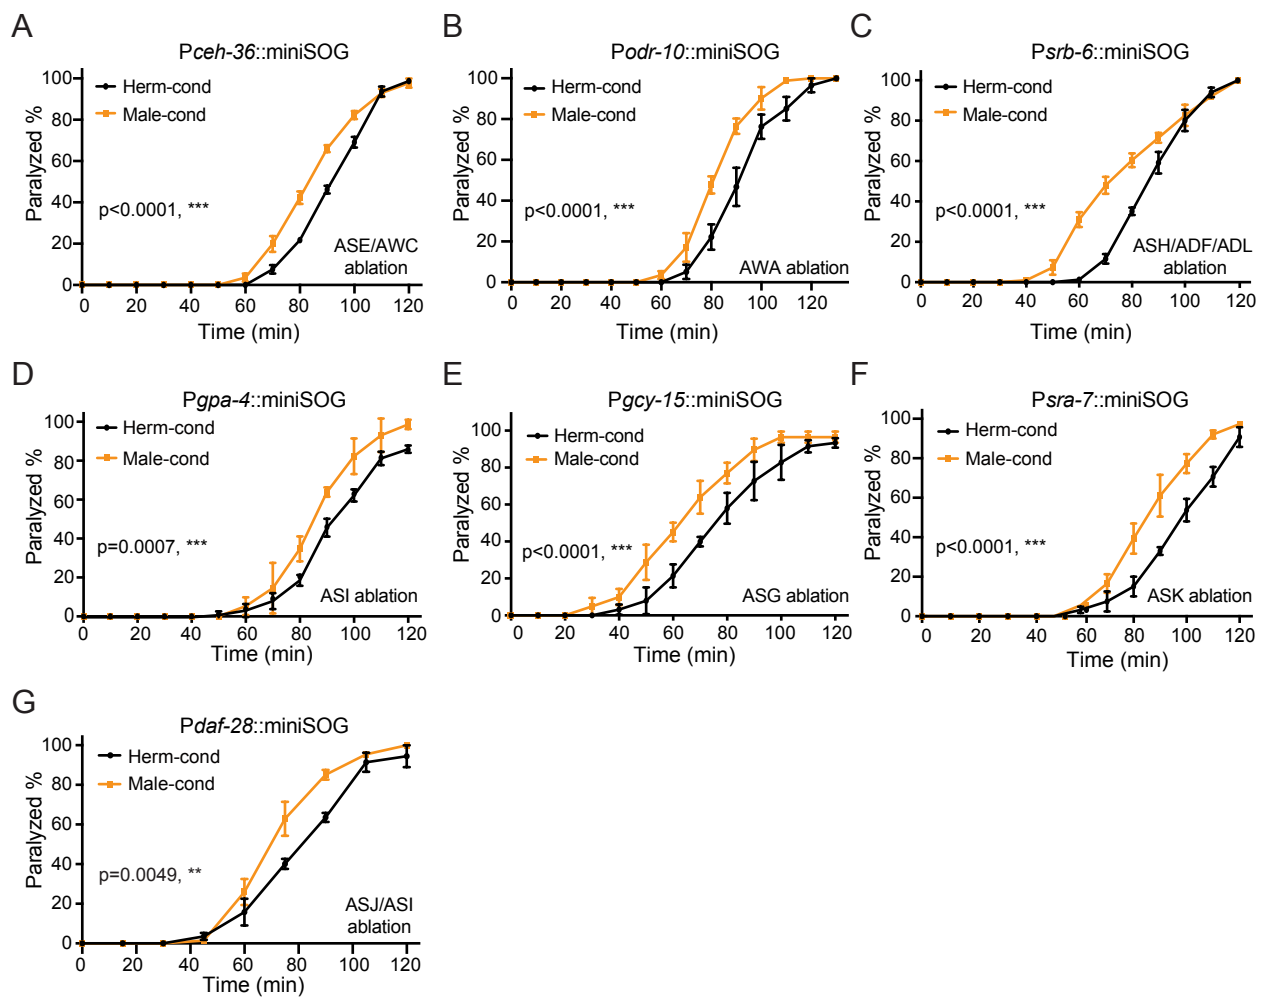

Qian *et al.* Figure 4—figure supplement 2

Supplement: supp [file elife-67170-supp-v1.zip]

A

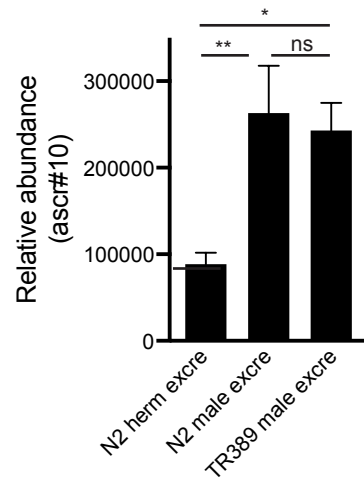

B

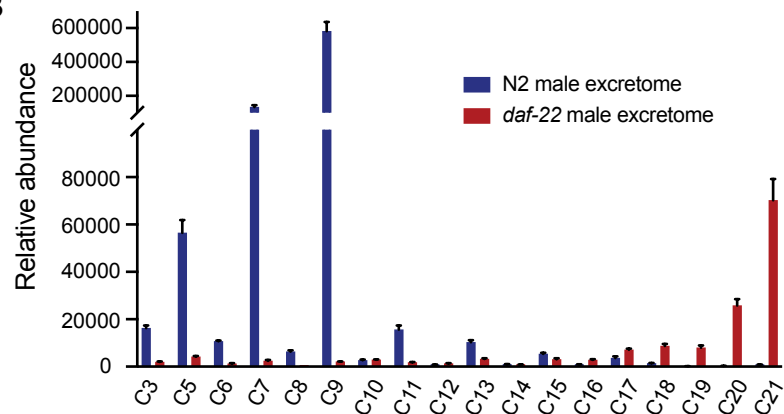

C

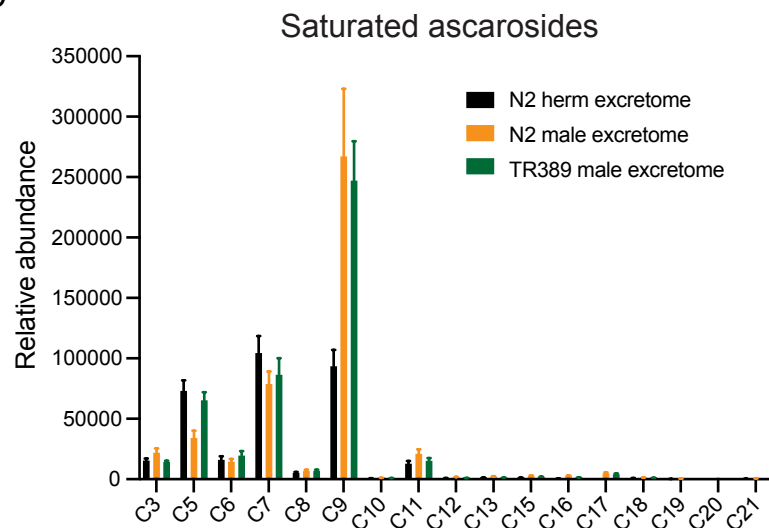

Supplement: supp [file elife-67170-supp-v1.zip]

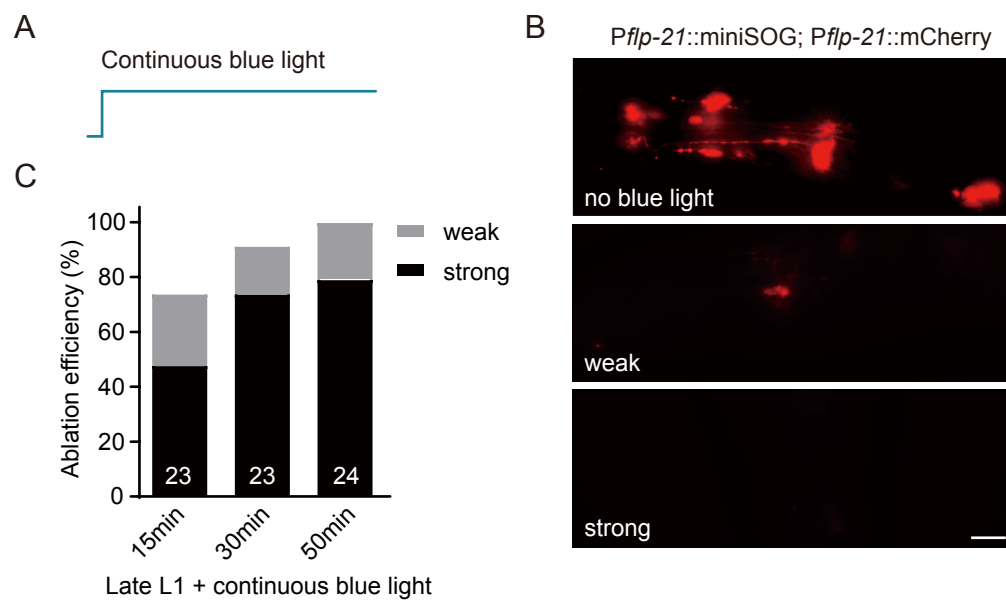

Qian *et al.* Figure 4—figure supplement 1

Supplement: supp [file elife-67170-supp-v1.zip]

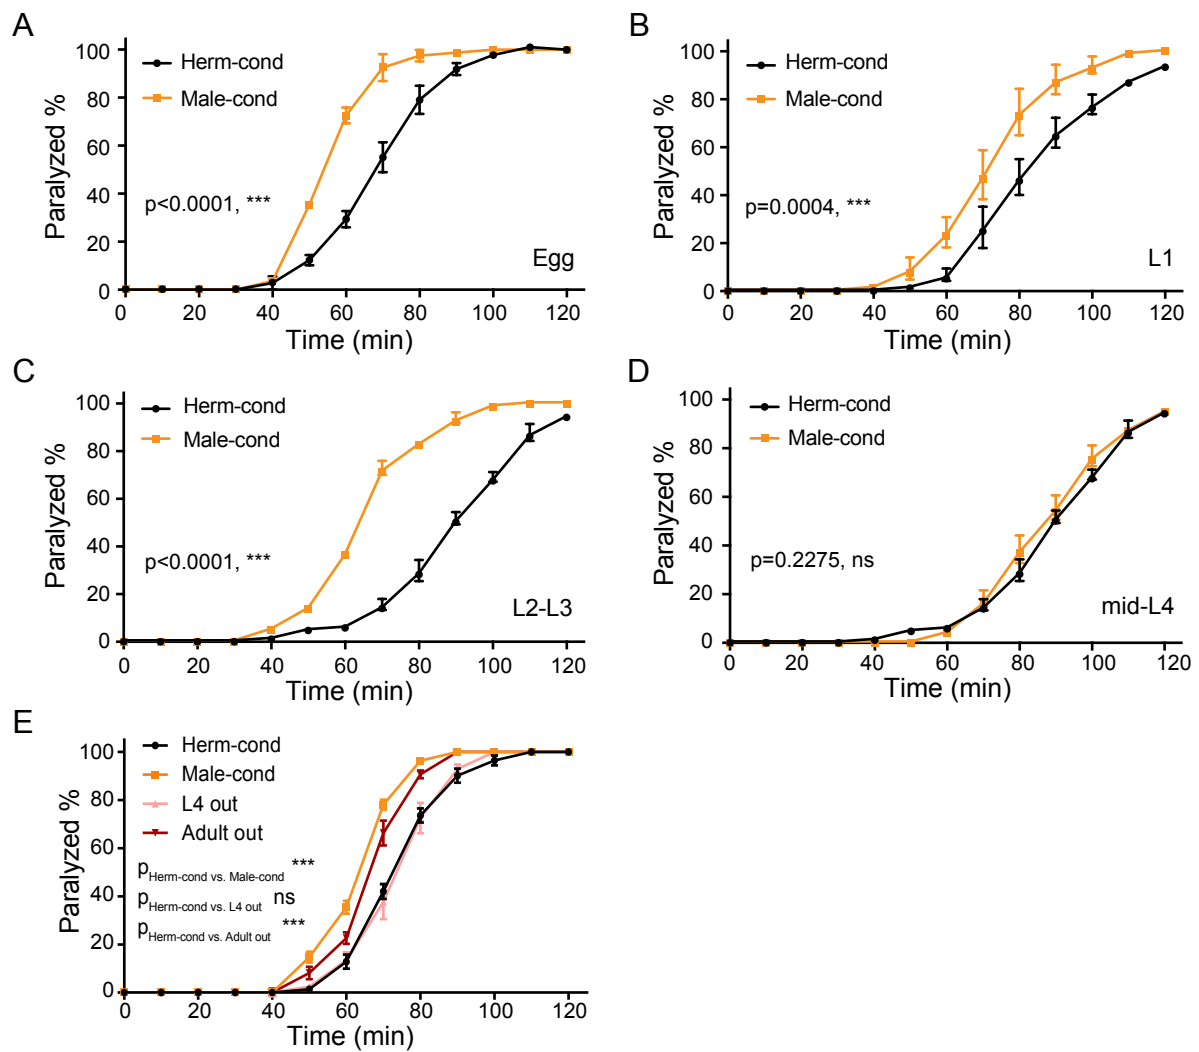

Qian *et al.* Figure 2—figure supplement 1

Supplement: supp [file elife-67170-supp-v1.zip]

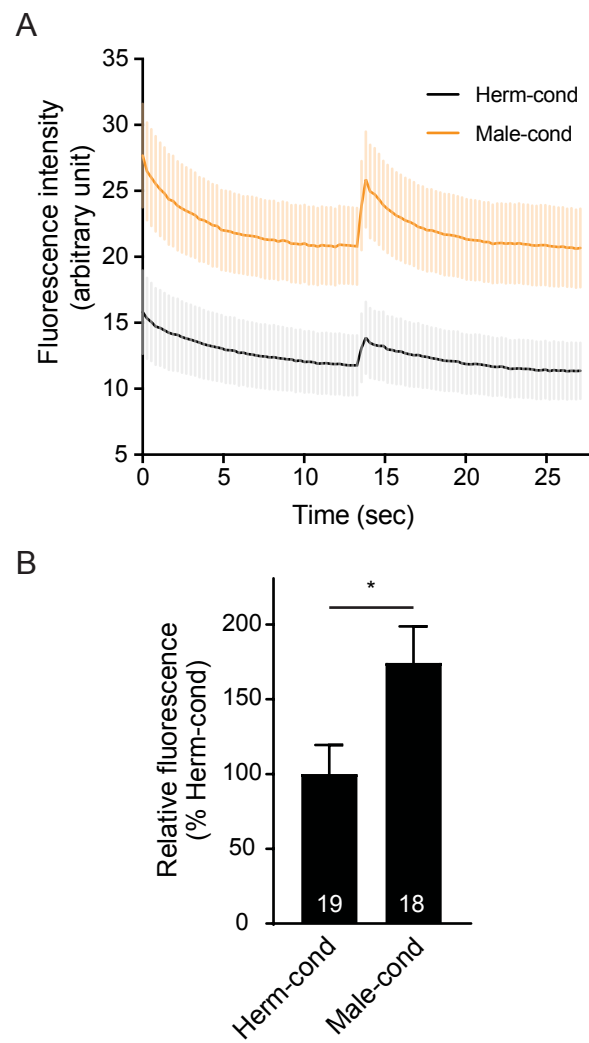

Qian *et al.* Figure 1—figure supplement 1

Supplement: supp [file elife-67170-supp-v1.zip]

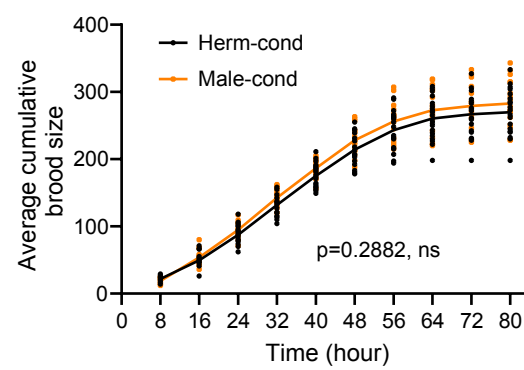

Qian *et al.* Figure 2—figure supplement 4

Supplement: supp [file elife-67170-supp-v1.zip]

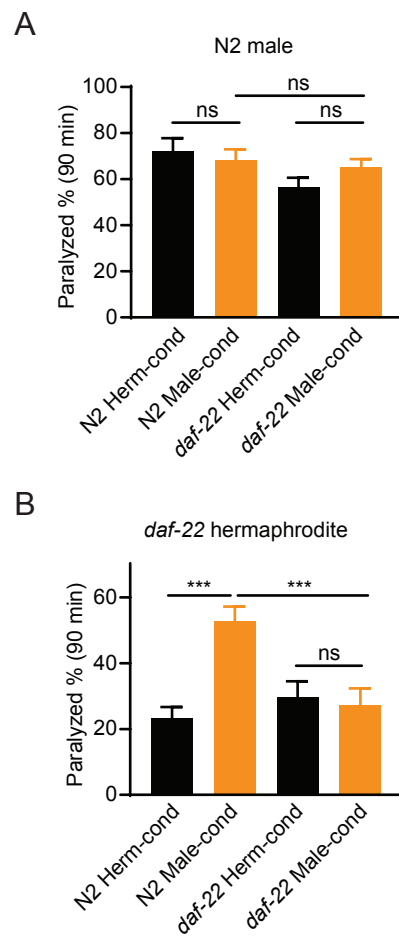

Qian *et al.* Figure 3—figure supplement 1

Supplement: supp [file elife-67170-supp-v1.zip]

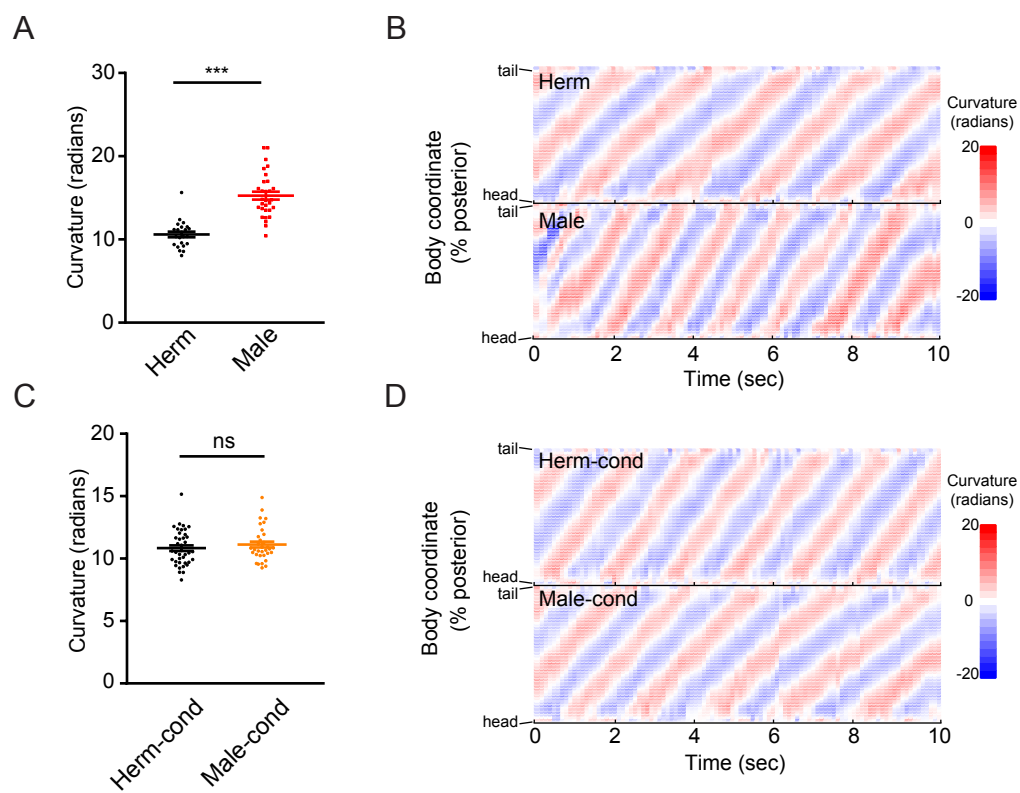

Qian *et al.* Figure 2—figure supplement 3

Supplement: supp [file elife-67170-supp-v1.zip]

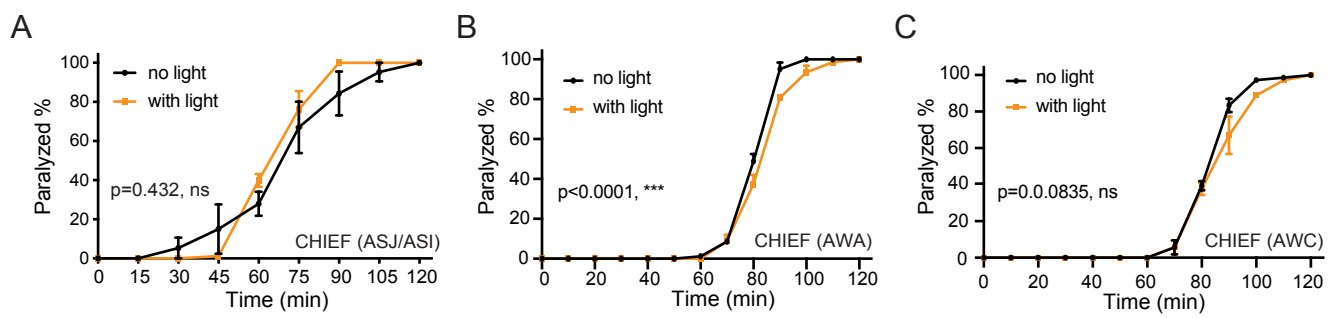

Qian *et al.* Figure 4—figure supplement 3

Supplement: supp [file elife-67170-supp-v1.zip]

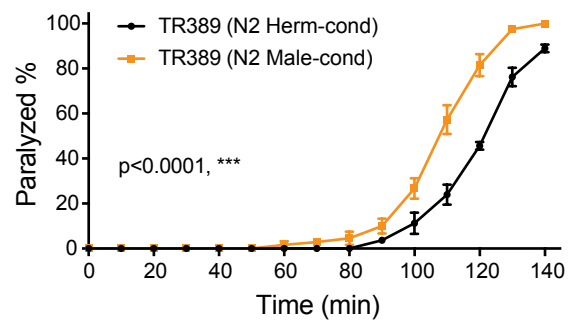

Qian *et al.* Figure 2—figure supplement 2

Supplement: supp [file elife-67170-supp-v1.zip]

A

*Punc-129::UNC-57::mCherry*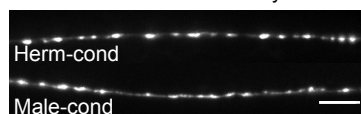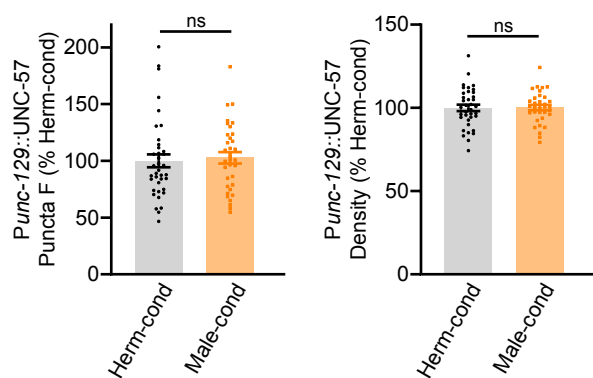

B

*Punc-47::UNC-57::mCherry*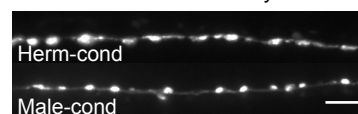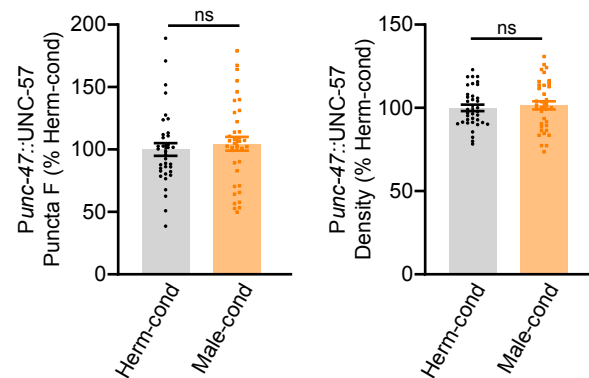

Supplement: supp [file elife-67170-supp-v1.zip]
